1 **Two voltage-dependent currents can explain the functional**  
2 **diversity of embryonic Renshaw cells.**

3  
4 Juliette Boeri<sup>1¶</sup>, Claude Meunier<sup>2¶</sup>, Hervé Le Corrond<sup>1,3¶</sup>, Pascal Branchereau<sup>4</sup>, Yulia

5 Timofeeva<sup>2,5,6</sup>, François Xavier Lejeune<sup>7</sup>, Christine Mouffle<sup>1</sup>, Hervé Arulkandarajah<sup>1</sup>, Jean

6 Marie Mangin<sup>1</sup>, Pascal Legendre<sup>1&\*</sup>, Antony Czarnecki<sup>1&\*</sup>

7  
8 <sup>1</sup> INSERM, UMR\_S 1130, CNRS, UMR 8246, Neuroscience Paris Seine, Institute of Biology  
9 Paris Seine, Sorbonne Univ, Paris, France.

10  
11 <sup>2</sup> Centre de Neurosciences Intégratives et Cognition, CNRS UMR 8002, Institut  
12 Neurosciences et Cognition, Université de Paris, Paris, France.

13  
14 <sup>3</sup> Univ Angers, Angers, France.

15  
16 <sup>4</sup> Univ Bordeaux, INCIA, UMR 5287, Bordeaux, France.

17  
18 <sup>5</sup> Department of Computer Science and Centre for Complexity Science, University of  
19 Warwick, Coventry, UK.

20  
21 <sup>6</sup> Department of Clinical and Experimental Epilepsy, UCL Queen Square Institute of  
22 Neurology, University College London, London, UK.

23  
24 <sup>7</sup> Institut du Cerveau et de la Moelle Epinière, Centre de Recherche CHU Pitié-Salpêtrière,  
25 INSERM, U975, CNRS, UMR 7225, Sorbonne Univ, Paris, France.

26  
27 \* Corresponding authors  
28 Email: [pascal.legendre@inserm.fr](mailto:pascal.legendre@inserm.fr) (PL)  
29 Email: [antony.czarnecki@sorbonne-universite.fr](mailto:antony.czarnecki@sorbonne-universite.fr) (AC)

30  
31  
32 ¶These authors contributed equally to this work.

33  
34 &These authors also contributed equally to this work.

35 **Abstract**

36 Spontaneous neuronal activity occurs at the onset of the synaptogenesis in the central Nervous  
37 System and plays a major role in shaping developing neural networks. How intrinsic  
38 properties of neurons evolve during this critical developmental period remains largely  
39 unknown. We studied the Renshaw cells because they participate to the early-synchronized  
40 neuronal activity in the embryonic spinal cord. We found that these interneurons are  
41 subdivided into several functional clusters at the onset of the synaptogenesis and then display  
42 a transitory involution process during which they lose their ability to sustain tonic firing. This  
43 complex developmental trajectory results from the synergy between a persistent sodium  
44 inward current and a delayed rectifier potassium outward current, which are present in most  
45 neurons during development and in the adult. Taken together, our results reveal a core  
46 mechanism producing functional heterogeneity in embryonic neurons and likely shaping the  
47 ongoing of early spontaneous neuronal activity.

48

49 Keywords: development, spinal cord, embryo, Renshaw cell, firing pattern, functional  
50 involution, electrophysiology, biophysical modeling.

51

## 52 **Introduction**

53 The development of the central nervous system (CNS) follows complex steps, which  
54 depend on genetic and environmental factors and involve interactions between multiple  
55 elements of the neural tissue. Remarkably, emergent neurons begin to synchronize soon after  
56 the onset of synapse formation, generating long episodes of low frequency (<0.01 Hz)  
57 correlated spontaneous network activity (SNA) (Blankenship & Feller 2010, Hanson &  
58 Landmesser 2003, Khazipov & Luhmann 2006, Milner & Landmesser 1999, Momose-Sato &  
59 Sato 2013, Myers et al 2005, O'Donovan 1999, Saint-Amant 2010). In the mouse embryonic  
60 spinal cord (SC), SNA is driven by an excitatory cholinergic-GABAergic loop between  
61 motoneurons (MNs) and interneurons (INs), GABA being depolarizing before embryonic day  
62 16.5 (E16.5) (Allain et al 2011). SNA emerges around E12.5 (Branchereau et al 2002,  
63 Czarnecki et al 2014, Hanson & Landmesser 2003, Myers et al 2005, Yvert et al 2004), at a  
64 time when functional neuromuscular junctions are not yet established (Pun et al 2002) and  
65 sensory and supraspinal inputs have not yet reached the spinal motor networks (Angelim et al  
66 2018, Ballion et al 2002, Marmigere & Ernfors 2007, Ozaki & Snider 1997).

67 Several studies pointed out that SNA is an essential component in neuronal networks  
68 formation. (Hanson et al 2008, Katz & Shatz 1996, Moody & Bosma 2005, Spitzer 2006). In  
69 the SC, pharmacologically-induced disturbances of SNA between E12.5 and E14.5 induce  
70 defects in the formation of motor pools, in motor axon guidance to their target muscles and in  
71 the development of motor networks (Hanson & Landmesser 2004, Hanson & Landmesser  
72 2006, Hanson et al 2008, Myers et al 2005). During SNA episodes, long lasting giant  
73 depolarization potentials (GDPs) are evoked in the SC, mainly by the massive release of  
74 GABA onto MNs (Czarnecki et al 2014). Renshaw cells ( $V1^R$ ) are likely the first GABAergic  
75 partners of MNs in the mouse embryo (Benito-Gonzalez & Alvarez 2012, Boeri et al 2018),

76 and the massive release of GABA during SNA probably requires that many of them display  
77 repetitive action potential firing or plateau potential activity (Boeri et al 2018).

78 However, little is known about the maturation of the intrinsic properties and the firing  
79 pattern of embryonic  $V1^R$ . We recently found that  $V1^R$  exhibit heterogeneous excitability  
80 properties when SNA emerges in the SC (Boeri et al 2018) in contrast to adult Renshaw cells  
81 that constitute a functionally homogeneous population (Bikoff et al 2016, Perry et al 2015).  
82 Whether this early functional diversity really reflects distinct functional classes of embryonic  
83  $V1^R$ , how this diversity evolves during development, and what are the underlying biophysical  
84 mechanisms remain open questions. The impact of the functional diversity of  $V1^R$  on MN  
85 activity during SNA episodes is also unknown. The present study addresses these issues using  
86 multiple approaches, including patch-clamp recordings, cluster analysis, biophysical  
87 modeling and dynamical systems theory. The firing patterns of  $V1^R$  and the mechanisms  
88 underlying their functional diversity are analyzed during a developmental period covering the  
89 initial phase of development of SC activity in the mouse embryo (E11.5-E14.5), when SNA is  
90 present, and during the critical period (E14.5-E16.5), when GABAergic neurotransmission  
91 gradually shifts from excitation to inhibition and locomotor-like activity emerges  
92 (Branchereau et al 2002, Myers et al 2005, Yvert et al 2004).

93 We discover that the balance between the slowly inactivating subthreshold persistent  
94 sodium inward current ( $I_{Nap}$ ) (Crill 1996) and the delayed rectifier potassium outward current  
95 ( $I_{Kdr}$ ), accounts for the heterogeneity of embryonic  $V1^R$  and the changes in firing pattern  
96 during development. The heterogeneity of  $V1^R$  at E12.5 arises from the existence of distinct  
97 functional groups. Surprisingly, and in opposition to the classically accepted development  
98 scheme (Gao & Ziskind-Conhaim 1998, Gao & Lu 2008, Liu et al 2016, McKay & Turner  
99 2005, Pineda & Ribera 2010, Sillar et al 1992), we show that the embryonic  $V1^R$  population  
100 loses its ability to support tonic firing from E13.5 to E15.5, exhibiting a transient functional

101 involution during its development. Our experimental and theoretical results provide a global  
102 view of the developmental trajectories of embryonic V1<sup>R</sup>. They demonstrate how a simple  
103 mechanism, based on the synergy of two major opposing voltage-dependent currents that are  
104 ubiquitous in neurons, can produce functional diversity.  
105

## 106 **Results**

### 107 *The delayed potassium rectifier current $I_{Kdr}$ is a key partner of the persistent sodium* 108 *current $I_{Nap}$ in controlling embryonic $V1^R$ firing patterns during development*

109 We previously highlighted that  $V1^R$  are spontaneously active at E12.5. Their response to a  
110 2 s suprathreshold depolarizing current steps revealed four main patterns, depending of the  
111 recorded interneuron (Boeri et al 2018):  $V1^R$  firing only 1-3 APs at the onset depolarizing  
112 pulse, which were named single spiking (SS)  $V1^R$ , repetitive spiking (RS)  $V1^R$  (Figure 1A),  
113 long-lasting sodium-dependent plateau potentials (PP)  $V1^R$  and mixed events (ME)  $V1^R$  that  
114 shows an alternation of action potentials (APs) and plateau potentials (Boeri et al 2018).

115 We also uncovered a relationship between  $I_{Nap}$  and the ability of embryonic  $V1^R$  to sustain  
116 repetitive firing (Boeri et al 2018). However, the heterogeneous firing patterns of  $V1^R$   
117 observed at E12.5 could not be fully explained by variations in  $I_{Nap}$  (Boeri et al 2018)  
118 suggesting the involvement of other voltage-gated channels, in particular potassium channels,  
119 known to control firing and AP repolarization, play a role in controlling the firing pattern of  
120  $V1^R$ . Our voltage clamp protocol did not reveal any inward rectifying current  
121 (hyperpolarizing voltage steps to -100 mV from  $V_H = -20$  mV, data not shown), but we found  
122 two voltage-dependent outward potassium currents, a delayed rectifier current ( $I_{Kdr}$ ) and a  
123 transient potassium current ( $I_A$ ) in embryonic  $V1^R$ , whatever the firing pattern (Figures 1 B1,  
124 B2 and B3). These two currents are known to control AP duration and/or firing pattern  
125 (Coetzee et al 1999). The activation threshold of  $I_{Kdr}$  lied between -30 mV and -20 mV and  
126 the threshold of  $I_A$  between -60 mV and -50 mV, (n = 27) (Figures 1 C1, C2 and C3).

127 It was unlikely that the heterogeneity of  $V1^R$  firing patterns resulted from variations in the  
128 intensity of  $I_A$ . Indeed its voltage-dependent inactivation (time constant:  $23.3 \pm 2.6$  ms, n = 8),  
129 which occurs during the depolarizing phase of an AP, makes it ineffective to control AP or  
130 plateau potential durations. This was confirmed by our theoretical analysis (see Figure 10-

131 figure supplemental 1). We thus focused on  $I_{Kdr}$ . At E12.5, PP V1<sup>R</sup> had a significantly lower  
132  $G_{Kdr}$  ( $2.12 \pm 0.44$  nS, n = 6) than SS V1<sup>R</sup> ( $5.57 \pm 0.56$  nS, n = 9) and RS V1<sup>R</sup> ( $6.39 \pm 0.83$  nS,  
133 n = 7) (Figure 2A). In the same manner, PP V1<sup>R</sup> at E12.5 had a significantly lower  $G_{Kdr}$  than  
134 SS V1<sup>R</sup> at E14.5 ( $11.11 \pm 1.12$  nS, n = 10). However, there was no significant difference  
135 in  $G_{Kdr}$  between SS V1<sup>R</sup> and RS V1<sup>R</sup> at E12.5 (Figure 2A), which indicated that variations in  
136  $G_{Kdr}$  alone could not explain all the firing patterns observed at E12.5. Similarly, there was no  
137 significant difference in  $G_{Nap}$  between RS V1<sup>R</sup> ( $0.91 \pm 0.08$  nS, n = 8) and PP V1<sup>R</sup> ( $1.24 \pm$   
138  $0.19$  nS, n = 6) at E12.5 (Figure 2B), indicating that variations in  $G_{Nap}$  alone could not  
139 explain all the firing patterns of V1<sup>R</sup> at E12.5 (Boeri et al 2018). In contrast  $G_{Nap}$  measured in  
140 SS V1<sup>R</sup> at E12.5 ( $0.21 \pm 0.06$  nS, n = 9) were significantly lower compared to  $G_{Nap}$  measured  
141 in RS V1<sup>R</sup> and in PP V1<sup>R</sup> at E12.5 (Figure 2B).

142 Because the firing pattern of a neuron depends on the balance between outward currents  
143 and inward voltage-dependent currents (Coetzee et al 1999), we then hypothesized that the  
144 different firing patterns of V1<sup>R</sup> observed at E12.5 were related to the  $G_{Nap} / G_{Kdr}$  ratio. We  
145 found that this ratio was significantly lower for SS V1<sup>R</sup> recorded at E12.5 ( $G_{Nap} / G_{Kdr} =$   
146  $0.043 \pm 0.015$ , n = 9) or at E14.5 ( $0.012 \pm 0.004$ , n = 10) compared to RS V1<sup>R</sup> ( $0.154 \pm 0.022$ ,  
147 n = 8) and PP V1<sup>R</sup> ( $0.66 \pm 0.132$ , n = 6) recorded at the same age (Figure 2C). We also found  
148 that the  $G_{Nap} / G_{Kdr}$  ratio was significantly lower for RS V1<sup>R</sup> compared to PP V1<sup>R</sup> (Figure  
149 2C).

150 Altogether, these results strongly suggest that, although the presence of  $I_{Nap}$  is required  
151 for embryonic V1<sup>R</sup> to fire repetitively or to generate plateau potentials (Boeri et al 2018), the  
152 heterogeneity of the firing pattern observed between E12.5 is not determined by  $I_{Nap}$  *per se*  
153 but likely by a synergy between  $I_{Nap}$  and  $I_{Kdr}$ .

154

155 ***Manipulating the balance between  $G_{Nap}$  and  $G_{Kdr}$  changes embryonic V1<sup>R</sup> firing patterns.***

156 We previously showed that blocking  $I_{Nap}$  with riluzole converted PP  $V1^R$  or RS  $V1^R$  into  
157 SS  $V1^R$  (Boeri et al 2018). To confirm further that the balance between  $G_{Nap}$  and  $G_{Kdr}$  was  
158 the key factor in the heterogeneity of  $V1^R$  firing patterns, we assessed to what extent a given  
159 SS  $V1^R$  cell could change its firing pattern when  $I_{Kdr}$  was gradually blocked by 4-  
160 aminopiridine (4-AP). We found that  $I_{Kdr}$  could be blocked by  $\mu\text{M}$  concentrations of 4-AP  
161 (Figure 3) without affecting  $I_A$  (Figure 3-Figure supplement 1). 4-AP, applied at  
162 concentrations ranging from 0.3  $\mu\text{M}$  to 300  $\mu\text{M}$ , specifically inhibited  $I_{Kdr}$  (Figures 3 A1 and  
163 A2) with an  $\text{IC}_{50}$  of 2.9  $\mu\text{M}$  (Figure 3B). These results favor the presence of the potassium  
164 channel subunit  $\text{K}_{V3.1}$  (Gutman et al 2005, Liu & Kaczmarek 1998), which is known to be  
165 also present at postnatal stages in  $V1^R$  (Song et al 2006).

166 We then determined to what extent increasing the concentration of 4-AP modified the  
167 firing pattern of  $V1^R$  at E12.5. Applying 4-AP at concentrations ranging from 3  $\mu\text{M}$  to 300  
168  $\mu\text{M}$  changed the firing pattern of SS  $V1^R$  recorded at E12.5 ( $n = 10$ ) in a concentration-  
169 dependent manner (Figures 4 A1, A2 and A3). In 50% of the recorded  $V1^R$ , increasing 4-AP  
170 concentrations successfully transformed SS  $V1^R$  into PP  $V1^R$  with the following sequence: SS  
171  $\rightarrow$  RS  $\rightarrow$  ME  $\rightarrow$  PP (Figure 4A1). In a second group of embryonic  $V1^R$  (25%), 4-AP  
172 application only evoked mixed activity, with the same sequence as aforementioned (SS  $\rightarrow$  RS  
173  $\rightarrow$  ME). In the remaining SS  $V1^R$  (25%), increasing 4-AP concentration only led to sustained  
174 AP firing (Figure 4A2). Application of 300  $\mu\text{M}$  4-AP on RS  $V1^R$  at E12.5 evoked mixed  
175 events or plateau potentials (Figure 4-figure supplement 1). Plateau potentials and repetitive  
176 spiking evoked in the presence of 300  $\mu\text{M}$  4-AP were fully blocked by 0.5-1  $\mu\text{M}$  TTX,  
177 indicating that they were generated by voltage-gated  $\text{Na}^+$  channels (Figures 4 B and C and  
178 Figure 4-figure supplement 1). It should be noted that the application of 300  $\mu\text{M}$  of 4-AP  
179 induced a significant  $30.5 \pm 12.4$  % increase ( $P = 0.0137$ ; Wilcoxon test) of the input  
180 resistance ( $1.11 \pm 0.08$   $\text{G}\Omega$  versus  $1.41 \pm 0.12$   $\text{G}\Omega$ ;  $n = 11$ ).



181

182 These results show that, in addition to  $I_{Nap}$ , the delayed rectifier potassium current is also a  
183 major determinant of the firing pattern of embryonic  $V1^R$ . They suggest that the firing pattern  
184 depends on a synergy between  $I_{Nap}$  and  $I_{Kdr}$  and that the different patterns can be ordered  
185 along the following sequence SS  $\rightarrow$  RS  $\rightarrow$  ME  $\rightarrow$  PP when the ratio  $G_{Nap}/G_{Kdr}$  is increased.

186

### 187 ***The heterogeneity of the $V1^R$ firing patterns decreases during embryonic development***

188 It was unclear whether these different firing patterns corresponded to well separated  
189 classes within the E12.5  $V1^R$  population. To address this issue, we performed a hierarchical  
190 cluster analysis on 163 embryonic  $V1^R$ , based on three quantitative parameters describing the  
191 firing pattern evoked by the depolarizing pulse: the mean duration of evoked APs or plateau  
192 potentials measured at half-amplitude (mean  $\frac{1}{2}Ad$ ), the variability of the event duration  
193 during repetitive firing (coefficient of variation of  $\frac{1}{2}Ad$ : CV  $\frac{1}{2}Ad$ ) and the total duration of all  
194 events, expressed in percentage of the pulse duration (depolarizing duration ratio: ddr) (Figure  
195 5A inserts). In view of the large dispersion of mean  $\frac{1}{2}Ad$  and ddr values, cluster analysis was  
196 performed using the (decimal) logarithm of these two quantities (Sigworth & Sine 1987). The  
197 analysis of the distribution of log mean  $\frac{1}{2}Ad$ , CV  $\frac{1}{2}Ad$  and log ddr revealed multimodal  
198 histograms that could be fitted with several Gaussians (Figure 5-Figure supplement 1 A1, B1  
199 and C1). Cluster analysis based on these three parameters showed that the most likely number  
200 of clusters was 5 (Figures 5 A and B), as determined by the silhouette width measurement  
201 (Figure 5B). Two clearly separated embryonic  $V1^R$  groups with CV  $\frac{1}{2}Ad = 0$  stood out, as  
202 shown in the 3D plot in figure 5C. The cluster with the largest  $\frac{1}{2}Ad$  (mean  $\frac{1}{2}Ad = 833.5 \pm$   
203  $89.99$  ms) and the largest ddr ( $0.441 \pm 0.044$ ) contained all PP  $V1^R$  ( $n = 35$ ) (Figures 5C and  
204 D and Figure 5-Figure supplement 1 A2, B2 and C2). Similarly, the cluster with the shortest

205  $\frac{1}{2}$ Ad ( $9.73 \pm 0.66$  ms) and the lowest ddr ( $0.0051 \pm 0.0004$ ) contained all SS  $V1^R$  ( $n = 46$ )  
206 (Figures 5 C and D and Figure 5-figure supplement 1 A2, B2 and C2).

207 The three other clusters corresponded to  $V1^R$  with nonzero values of CV  $\frac{1}{2}$ Ad (Figure 5C).  
208 A first cluster regrouping all RS  $V1^R$  ( $n = 69$ ) was characterized by smaller values of  $\frac{1}{2}$ Ad  
209 ( $23.91 \pm 1.43$  ms), CV  $\frac{1}{2}$ Ad ( $27.36 \pm 1.64\%$ ) and ddr ( $0.11 \pm 0.01$ ) (Figures 5C and D and  
210 figure 5-figure supplement 1 A2, B2 and C2). The last two clusters corresponded to ME  $V1^R$   
211 (Figures 1C and 1D). The smaller cluster, characterized by a larger CV  $\frac{1}{2}$ Ad ( $170.9 \pm 8.9\%$ ;  
212  $n = 4$ ), displayed a mix of APs and short plateau potentials, while the second cluster, with  
213 smaller CV  $\frac{1}{2}$ Ad ( $87.61 \pm 7.37\%$ ;  $n = 9$ ), displayed a mix of APs and long-lasting plateau  
214 potentials (Figure 5D and figure 5-figure supplement 1 B2). Their  $\frac{1}{2}$ Ad and ddr values were  
215 not significantly different (Figure 5-figure supplement 1 A2 and C2).

216 It must be noted that three embryonic  $V1^R$  (1.8%) were apparently misclassified since they  
217 were aggregated within the RS cluster although having zero CV  $\frac{1}{2}$ Ad (Figure 5C; arrows).  
218 Examination of their firing pattern revealed that this was because they generated only two  
219 APs, although their ddr (0.16 to 0.2) and  $\frac{1}{2}$  Ad values (31.6 to 40.3 ms) were well in the range  
220 corresponding of the RS cluster.

221 These different firing patterns of  $V1^R$  might reflect different states of neuronal  
222 development (Belleau & Warren 2000, Gao & Ziskind-Conhaim 1998, Picken Bahrey &  
223 Moody 2003, Ramoa & McCormick 1994). Single spiking and/or plateau potentials are  
224 generally believed to be the most immature forms of firing pattern, repetitive spiking  
225 constituting the most mature form (Spitzer 2006, Tong & McDearmid 2012). If it were so, the  
226 firing patterns of embryonic  $V1^R$  would evolve during embryonic development from single  
227 spiking or plateau potential to repetitive spiking, this latter firing pattern becoming the only  
228 one in neonates (Perry et al 2015) and at early postnatal stages (Bikoff et al 2016). However,  
229 RS neurons already represent 41% of  $V1^R$  at E12.5. We therefore analyzed the development

230 of firing patterns from E11.5, when  $V1^R$  terminate their migration and reach their final  
231 position (Alvarez et al 2013), to E16.5. This developmental period covers a first phase of  
232 development (E11.5-E14.5), where lumbar spinal networks exhibit SNA, and a second phase  
233 (E14.5-E16.5), where locomotor-like activity emerges (Allain et al 2010, Branchereau et al  
234 2000, Myers et al 2005, Yvert et al 2004). We first analyzed changes in the intrinsic  
235 properties (input capacitance  $C_{in}$ , input resistance  $R_{in} = 1/G_{in}$  and spike voltage threshold)  
236 of  $V1^R$ .  $C_{in}$  did not change significantly from E11.5 to E13.5 (Figure 6A), remaining of the  
237 order of 12 pF, in agreement with our previous work (Boeri et al 2018). However, it increased  
238 significantly at the transition between the two developmental periods (E13.5-E15.5) to reach  
239 about 23.5 pF at E15.5 (Figure 6A). A similar developmental pattern was observed for  $R_{in}$ ,  
240 which remained stable during the first phase from E11.5 to E14.5 ( $R_{in} \approx 1-1.2 \text{ G}\Omega$ ) but  
241 decreased significantly after E14.5 to reach about 0.7  $\text{G}\Omega$  at E15.5 (Figure 2B). Spike  
242 threshold also decreased significantly between the first and the second developmental phases,  
243 dropping from about -34 mV at E12.5 to about -41 mV at E16.5 (Figure 2C). Interestingly,  
244 this developmental transition around E14.5 correspond to the critical stage at which SNA  
245 gives way to a locomotor-like activity (Allain et al 2010, Branchereau et al 2000, Yvert et al  
246 2004) and rhythmic activity becomes dominated by glutamate release rather than  
247 acetylcholine release (Myers et al 2005).

248 This led us to hypothesize that this developmental transition could be also critical for the  
249 maturation of  $V1^R$  firing patterns. The distinct firing patterns observed at E12.5 were already  
250 present at E11.5 (Figures 7 A and F), but the percentage of RS  $V1^R$  strongly increased from  
251 E11.5 to E12.5, while the percentage of ME  $V1^R$  decreased significantly (Figure 7F). The  
252 heterogeneity of  $V1^R$  firing patterns then substantially diminished. Plateau potentials were no  
253 longer observed at E13.5, and ME  $V1^R$  disappeared at E14.5 (Figures 7 C and F).  
254 Interestingly, the proportion of SS  $V1^R$  remained high from E13.5 to E15.5 and even slightly

255 increased (91.23% at E14.5 and 93.33% at E15.5; Figure 7F). This trend was partially  
256 reversed at E16.5, as the percentage of RS V1<sup>R</sup> increased at the expense of SS V1<sup>R</sup> (67.86 %  
257 SS V1<sup>R</sup> and 32.34% RS V1<sup>R</sup>; Figures 7 E and F). This decrease in repetitive firing capability  
258 after E13.5 was surprising in view of what is classically admitted on the developmental  
259 pattern of neuronal excitability (Moody & Bosma 2005, Spitzer et al 2000). Therefore, we  
260 verified that it did not reflect the death of some V1<sup>R</sup> after E13.5. Our data did not reveal any  
261 activated caspase3 (aCaspase3) staining in V1<sup>R</sup> (FoxD3 staining) at E14.5 (n = 10 SCs)  
262 (Figure 8), in agreement with previous reports showing that developmental cell death of V1<sup>R</sup>  
263 does not occur before birth (Prasad et al 2008).

264 To determine to what extent the balance between  $G_{Nap}$  and  $G_{Kdr}$  was the key factor that  
265 also determined the V1<sup>R</sup> firing patterns at E14.5 (Figures 7 C and F), we tested the effect of 4-  
266 AP on single spiking V1<sup>R</sup> at this embryonic age.  $G_{Kdr}$  in SS V1<sup>R</sup> at E14.5 ( $11.11 \pm 1.12$  nS, n  
267 = 10) was significantly high when compared to  $G_{Kdr}$  measured at E12.5 in SS V1<sup>R</sup> (Figure  
268 2A).  $I_{Nap}$  can still be observed in V1<sup>R</sup> at E14.5 (Figure 9-Figure supplement 1).  $G_{Nap}$   
269 measured in SS V1<sup>R</sup> at E14.5 ( $0.13 \pm 0.05$  nS, n = 10) was similar to the  $G_{Nap}$  measured at  
270 E12.5 in SS V1<sup>R</sup> (Figure 2B). At E14.5, 300  $\mu$ M 4-AP inhibited only 59.2% of  $I_{Kdr}$ .  
271 Increasing 4-AP concentration to 600  $\mu$ M did not inhibit  $I_{Kdr}$  significantly more (60.2%)  
272 (Figure 9-Figure supplement 2), indicating that inhibition of  $I_{Kdr}$  by 4-AP reached a plateau  
273 at around 300  $\mu$ M. 600  $\mu$ M 4-AP application had no significant effect on  $I_A$  (Figure 9-Figure  
274 supplement 2). The application of the maximal concentration of 4-AP tested (600  $\mu$ M)  
275 converted SS V1<sup>R</sup> (n = 13) to PP V1<sup>R</sup> (23.1%; Figures 9 A1 and B), RS V1<sup>R</sup> (38.5%; Figure 9  
276 A2 and B) or ME V1<sup>R</sup> (38.4%; Figure 9B), as was observed at E12.5, thus indicating that the  
277 firing pattern of V1<sup>R</sup> depends on the balance between  $I_{Nap}$  and  $I_{Kdr}$  also at E14.5. Plateau  
278 potential and repetitive spiking recorded in the presence of 4-AP at E14.5 were fully blocked

279 by 0.5-1  $\mu\text{M}$  TTX indicating that they were generated by voltage-gated  $\text{Na}^+$  channels (Figures  
280 9 A1 and A2), as observed at E12.5.

281

### 282 *Theoretical analysis: basic model*

283 As shown in Figure 10A for 26 cells, in which both  $G_{Nap}$  and  $G_{Kdr}$  were measured, the  
284 three largest clusters revealed by the hierarchical clustering analysis (SS, RS and PP, which  
285 account together for the discharge of more than 95% of cells, see Figure 5) correspond to well  
286 defined regions of the  $G_{Nap}$ - $G_{Kdr}$  plane. Single spiking is observed only when  $G_{Nap}$  is  
287 smaller than 0.6 nS. For larger values of  $G_{Nap}$ , repetitive spiking occurs when  $G_{Kdr}$  is larger  
288 than 3.5 nS, and  $V1^R$  display plateau potentials when  $G_{Kdr}$  is smaller than 3.5 nS. Mixed  
289 events (ME, 4.5% of the 163 cells used in the cluster analysis), where plateaus and spiking  
290 episodes alternate, are observed at the boundary of RS and PP clusters. This suggested to us  
291 that a conductance-based model incorporating only the leak current,  $I_{Nat}$ ,  $I_{Nap}$  and  $I_{Kdr}$  (see  
292 Materials and Methods) could account for the experimental observations, the observed  
293 zonation being explained in terms of bifurcations between the different stable states of the  
294 model.

295 A one-parameter bifurcation diagram of the model is shown in Figure 10B for two values  
296 of  $G_{Kdr}$  (2.5 nS and 10 nS) and a constant injected current  $I = 20$  pA. The slow inactivation of  
297  $I_{Nap}$  was not taken into account at this stage of our analysis. For  $G_{Kdr} = 10$  nS, the steady-  
298 state membrane voltage progressively increases (in gray) with  $G_{Nap}$ , but repetitive spiking (in  
299 red, see voltage trace for  $G_{Nap} = 1.5$  nS) is not achieved until  $G_{Nap}$  reaches point  $\text{SN}_1$ , where a  
300 saddle node (SN) bifurcation of limit cycles occurs. This fits with the experimental data,  
301 where a minimal value of  $G_{Nap}$  is required for repetitive spiking (see also (Boeri et al 2018)),  
302 and is in agreement with the known role of  $I_{Nap}$  in promoting repetitive discharge (Kuo et al

2006, Taddese & Bean 2002). Below  $SN_1$ , the model responds to the onset of a current pulse  
by firing only one spike before returning to quiescence (see voltage trace for  $G_{Nap} = 0.1$  nS),  
or a few spikes when close to  $SN_1$  (not shown) before returning to quiescence. The quiescent  
state becomes unstable through a subcritical Hopf bifurcation (HB) at point  $HB_1$ , bistability  
between quiescence and spiking occurring between  $SN_1$  to  $HB_1$ . Repetitive firing persists  
when  $G_{Nap}$  is increased further and eventually disappears at point  $SN_2$ . The firing rate does  
not change much throughout the RS range (Figure 10-Figure supplement 1 B), remaining  
between 11.9 Hz (at  $SN_1$ ) and 17.1 Hz (at  $SN_2$ ). A stable plateau appears at point  $HB_2$  through  
a subcritical HB. The model is bistable between  $HB_2$  and  $SN_2$ , plateau and large amplitude  
APs coexisting in this range.

The model behaves very differently when  $G_{Kdr}$  is reduced to 2.5 nS (gray-blue curve in  
Figure 10B). It exhibits a unique stable fixed point whatever the value of  $G_{Nap}$  is, and the  
transition from quiescence to plateau is gradual as  $G_{Nap}$  is increased. No repetitive spiking is  
ever observed. This indicates that the activity pattern is controlled not only by  $G_{Nap}$  but also  
by  $G_{Kdr}$ . This is demonstrated further in Figure 10C, where  $G_{Nap}$  was fixed at 1.5 nS while  
 $G_{Kdr}$  was increased from 0 to 25 nS. The model exhibits a plateau potential until  $G_{Kdr}$  is  
increased past point  $HB_2$ . Repetitive spiking then sets in, *via* a supercritical HB (in contrast to  
the subcritical bifurcation in Figure 10B for  $G_{Kdr} = 10$  nS, see legend of Figure 10). The  
amplitude of AP decays to zero at  $HB_2$ , and no bistability occurs. When  $G_{Kdr}$  is further  
increased, repetitive firing eventually disappears through a SN bifurcation of limit cycles at  
point  $SN_1$ , the quiescent state becomes stable through a subcritical HB at point  $HB_1$ , and  
bistability occurs between these two points. This behavior is in agreement with Figure 10A.

Since both  $G_{Nap}$  and  $G_{Kdr}$  control the firing pattern of embryonic V1<sup>R</sup> cells, we computed a  
two-parameters bifurcation diagram (Figure 10D), where the different possible activity states  
and the transitions between them are plotted in the  $G_{Nap} - G_{Kdr}$  plane. The black lines

328 correspond to the bifurcations  $HB_1$  and  $HB_2$  and delimit a region where only repetitive firing  
329 occurs. The red lines correspond to the SN bifurcations of periodic orbits associated with the  
330 transition from quiescence to firing ( $SN_1$ ) and the transition from plateau to firing ( $SN_2$ ). They  
331 encompass a region (shaded area) where repetitive firing can be achieved but may coexist  
332 with quiescence (between the  $HB_1$  and  $SN_1$  lines) or plateau potential (in the narrow region  
333 between the  $HB_2$  and  $SN_2$  lines). We note that the  $SN_1$  and  $SN_2$  lines merge with the  $HB_1$  and  
334  $HB_2$  lines at points  $B_1$  and  $B_2$ , respectively. There, codimension-two Bautin bifurcations occur,  
335 and the bifurcations  $HB_1$  and  $HB_2$  switch from subcritical to supercritical case.

336 Some important features of the diagram must be emphasized: 1) minimal values of both  
337  $G_{Nap}$  (to ensure sufficient excitability) and  $G_{Kdr}$  (to ensure proper spike repolarization) are  
338 required for repetitive spiking, 2) quiescence and plateau can be clearly distinguished only  
339 when they are separated by a region of repetitive spiking (see also Figure 10B for  $G_{Kdr}=10$   
340 nS), otherwise the transition is gradual (Figure 9B for  $G_{Kdr}=2.5$  nS), 3) only oblique lines  
341 with an intermediate slope cross the bifurcation curve and enter the RS region (see, for  
342 example, the red line in Figure 10D). This means that repetitive spiking requires an  
343 appropriate balance between  $I_{Nap}$  and  $I_{Kdr}$ . If the ratio  $G_{Nap}/G_{Kdr}$  is too large (blue line) or  
344 too small (gray line), only plateau potentials or quiescence will be observed at steady state.  
345 This is exactly what is observed in experiments, as shown by the cumulative distribution  
346 function of the ratio  $G_{Nap}/G_{Kdr}$  for the different clusters of embryonic  $V1^R$  in Figure 10E  
347 (same cells as in Figure 9A). The ratio increases according to the sequence  $SS \rightarrow RS \rightarrow ME$   
348  $\rightarrow PP$ , with an overlap of the distributions for  $SS V1^R$  and  $RS V1^R$ . Note also that the ratio for  
349 ME cells (around 0.25) matches the transition between repetitive spiking and plateau  
350 potentials in Figure 10D (more on this below).

351 Embryonic  $V1^R$  cells display voltage fluctuations of up to 5 mV, presumably due to  
352 channel noise. The relatively low number of sodium and potassium channels (of the order of a

353 few thousands) led to voltage fluctuations in the stochastic version of our model comparable  
354 to those seen experimentally when the cell was quiescent (top voltage trace in Figure 10D) or  
355 when a voltage plateau occurred (bottom trace). Channel noise caused some jitter during  
356 repetitive spiking (middle trace), with some occasionally missing spikes (not shown), and  
357 induced clearly visible variations in the amplitude of APs. However, repetitive firing proved  
358 to be very robust and was not disrupted by voltage fluctuations. Altogether, channel noise  
359 little alters the dynamics (compare the deterministic voltage traces in Figure 10B and the  
360 noisy traces in Figure 10D). This is likely because channel noise has a broad power spectrum  
361 and displays no resonance with the deterministic solutions of the model.

362 The one-parameter bifurcation diagram of our model was not substantially modified when  
363 we took  $I_A$  into account, as shown in Figure 10-Figure supplement 1. It just elicited a slight  
364 membrane hyperpolarization, a rightward shift of the firing threshold and a decrease of the  
365 firing frequency. The transition from repetitive firing to plateau was not affected because  $I_A$  is  
366 inactivated by depolarization.

367 The bifurcation diagram of Figure 10D accounts qualitatively for the physiological data on  
368  $V1^R$  at E12.5 presented in Figure 10A, as shown in Figure 10E where the conductance data of  
369 Figure 10A were superimposed on it. Its exact position in the  $G_{Nap} - G_{Kdr}$  plane actually  
370 depends on the values of the passive parameters and it was computed in Figure 10D and F for  
371  $G_{in} = 1$  nS and  $C_{in} = 13$  pF, the median values of the input capacitance and conductance at  
372 E12.5. Between E12.5 and E14.5,  $C_{in}$ , which provides an estimate of the cell size, increases  
373 by 38% in average, whereas  $G_{in}$  is not significantly modified (see Figure 6). As illustrated in  
374 Figure 9G the two-parameters bifurcation diagram is then shifted upward and rightward  
375 compared to Figure 10F, because larger conductances are required to obtain the same firing  
376 pattern. The observed regression of excitability from E12.5 to E14.5-E15.5 (see Figure 3) thus  
377 comes from a decrease in  $G_{Nap}$  density (see presumable developmental trajectories indicated



378 by arrow in Figure 10F) together with a shift of the RS region as cell size increases. As a  
379 result, all 9 cells shown in Figure 10G are deeply inside the SS region at E14.5.

380 It is a bit trickier to explain the experiments where 4-AP changed the firing pattern of SS  
381  $V1^R$  (Figure 4). This is because 4-AP decreases not only  $G_{Kdr}$  but also  $G_{in}$  and therefore the  
382 rheobase current. If we take these modifications of the input conductance and rheobase into  
383 account (Figure 10-Figure supplement 2), the bifurcation diagram remains qualitatively the  
384 same, but it is shifted toward the origin in the  $G_{Nap}$ - $G_{Kdr}$  plane. The bifurcation lines  
385 between SS and RS (SN1) and between RS and PP (SN2) are then successively crossed when  
386  $G_{Kdr}$  is reduced, in accordance with experimental results.

387

### 388 ***Theoretical analysis: extended model with slow inactivation of $I_{Nap}$***

389 Our basic model accounts for the firing pattern of 73% of the 163 cells used in the cluster  
390 analysis. However, bursting, under the form of recurring plateaus separated by brief  
391 repolarization episodes (see a typical trace in Figure 11A left), was experimentally observed  
392 in half of PP  $V1^R$  (24 out of 46) and plateaus intertwined with spiking episodes were recorded  
393 in the 13 cells of the ME cluster (8% of the total sample, see Figure 11A right for an example).  
394 Recurrent plateaus indicate membrane bistability. This requires that the  $I - V$  curve be S-  
395 shaped, which occurs when anomalous rectification is large (large  $G_{Nap}$  and small  $G_{Kdr}$ ,  
396 Figures 11B1 and 11B2). However, our basic model lacks a mechanism for switching  
397 between quiescent state and plateau. Channel noise might induce such transitions, but our  
398 numerical simulations showed that this is too infrequent to account for bursting (see voltage  
399 trace in Figure 11B1 where the plateau state is maintained despite channel noise).

400 To explain recurrent plateaus, we incorporated a slow dynamical process, namely the  
401 experimentally observed slow inactivation of  $I_{Nap}$ , in our model. The one-parameter  
402 bifurcation diagram of the basic model for  $G_{Kdr} = 2.5$  nS is shown in Figure 11C. The

403 injected current was reduced from the value of 20 pA used in the previous section to 8 pA, so  
404 as to allow for bistability (Figure 10B2). The  $G_{Nap} - V$  curve is then S-shaped, as shown in  
405 Figure 11B1, with a bistability region for  $G_{Nap}$  between 1.48 and 1.87 nS. This is in contrast  
406 with Figure 10B where the  $G_{Nap} - V$  curve was monotonic. Adding the slow (de)inactivation  
407 of  $I_{Nap}$  caused periodic transitions between up (plateau) and down (quiescent) states, and the  
408 model then displayed a stable limit cycle (shown in black in Figure 11C), as illustrated by the  
409 top voltage trace on the right. This mechanism is known as pseudo-plateau or plateau-like  
410 bursting (a.k.a. fold-subcritical HB bursting) (Teka et al 2011). It is akin to square wave  
411 bursting (Bertram et al 1995, Borisjuk & Rinzel 2005, Izhikevich 2000a, Rinzel 1985), but  
412 the up-state is a stable fixed point rather than a limit cycle (Osinga et al 2012, Osinga &  
413 Tsaneva-Atanasova 2010, Stern et al 2008), which is why recurrent plateaus are obtained  
414 rather than bursts of APs. The duration of the plateaus and repolarization episodes depends on  
415 the values of  $G_{Nap}$ ,  $G_{Kdr}$  and  $I$ , but it is also largely controlled by the inactivation kinetics. A  
416 voltage-independent time constant  $\tau_s$  leads to up and down states of comparable durations  
417 (see top voltage trace in Figure 11C), the duration of which increases with  $\tau_s$ . Making  
418  $\tau_s$  voltage-dependent changes the relative durations of plateaus and repolarization episodes. If  
419  $\tau_s$  decreases with membrane voltage, for instance, repolarization episodes are shortened  
420 (bottom voltage trace). Adding channel noise preserves bursting but introduces substantial  
421 randomness in the duration of plateaus and repolarization episodes (middle voltage trace). We  
422 also noted that adding the  $I_A$  current lengthened the repolarizing phase (Figure 10-Figure  
423 supplement 1).

424 Slow inactivation of  $I_{Nap}$  also provides an explanation for mixed patterns, where plateaus  
425 alternate with spiking episodes (Figure 11A, right). They take place in our model near the  
426 transition between repetitive spiking and plateau, as in experiments (Figure 10A). Slow

427 inactivation ( $V_s = -30$  mV,  $k_s = -5$  mV) can lead to elliptic bursting (Izhikevich 2000b, Su et  
428 al 2004) when the bifurcation  $HB_2$  is subcritical and located near the Bautin bifurcation  $B_2$ ,  
429 which is the case here (Figure 10D). The model then displays a stable limit cycle with  
430 alternating plateaus and spiking episodes, arising from crossing the bifurcation points  $HB_2$   
431 and  $SN_2$  back and forth (see bifurcation diagram in Figure 11D and top voltage trace). We  
432 note that sufficient deinactivation of  $I_{Nap}$  for triggering a new plateau is difficult to be  
433 achieved during spiking episodes, because voltage oscillates over a large range and variations  
434 of the inactivation level are largely averaged out. Therefore, we had to choose a shallower  
435 inactivation curve than for pseudo-plateau bursting together with a more depolarized half-  
436 inactivation voltage to achieve elliptic bursting. Otherwise, the model keeps on spiking  
437 repetitively without returning to the plateau state. This is probably why it is difficult in many  
438 recorded cells to elicit plateaus by increasing the injected current, an experimental  
439 observation that was not explained by our basic model.

440 When  $\tau_s$  is voltage-dependent and small enough in the subthreshold voltage range, there is  
441 not enough time for APs to be fired between plateaus (see bottom voltage trace in Figure  
442 11D). One then observes successive plateaus with superimposed voltage oscillations that  
443 decay at plateau onset and grow at offset. Both types of plateaus, with voltage oscillations  
444 (elliptic bursting) and without (pseudo-plateau bursting) were observed in the embryonic  $V1^R$   
445 we recorded. Finally, we note that bistability between plateau and repetitive spiking is not  
446 necessary for elliptic bursting, which may also be due to the slow passage through  $HB_2$  when  
447 this Hopf bifurcation is supercritical (Baer et al 1989, Holden & Erneux 1993). Slow  
448 inactivation of  $I_{Nap}$  then leads to a delayed destabilization of the plateau after  $HB_2$  is crossed,  
449 while deinactivation during repetitive spiking leads to the crossing of  $HB_2$  in the opposite  
450 direction and a delayed restabilization of the plateau (not shown).

451 Altogether, our study shows that a model incorporating the slow inactivation of  
452  $I_{Nap}$  accounts for all the firing patterns displayed by cells of the PP and ME clusters.

453

#### 454 ***4-AP increased GABAergic inputs on MNs at E12.5***

455 During SNA, MNs receive massive inputs from GABAergic INs and, to a lesser extent,  
456 from glutamatergic INs. This leads to the occurrence of Giant Depolarizing Potential (GDPs)  
457 (Czarnecki et al 2014).  $V1^R$  are likely the first INs to release GABA at E12.5 (Boeri et al  
458 2018). However, it is unclear how the heterogeneity of the activity patterns observed in  $V1^R$   
459 shapes GABA-evoked current in MNs, even though  $I_{Nap}$  appears essential for the occurrence  
460 of GDPs and SNA in the SC at E12.5 (Boeri et al 2018). To address this issue, we took  
461 advantage of the ability of 4-AP to change the activity pattern of  $V1^R$ . We focused our  
462 analysis on the evoked GABAergic Giant Inward Currents (GICs) (voltage clamp recordings;  
463  $E_{Cl} = -30$  mV) and GABAergic GDPs (current clamp recordings). GICs and GDPs were  
464 induced by a 1 ms stimulation applied at the cervical level of the SC while recording lumbar  
465 MNs (Figure 12A) in the presence of the broad-spectrum glutamate receptor antagonist  
466 kynurenic acid (4 mM). At E12.5, 4-AP increased the amplitude of GABAergic GICs ( $155 \pm$   
467  $86$  pA vs  $191 \pm 112$  at  $30$   $\mu$ M, and  $206 \pm 115$  pA at  $300$   $\mu$ M,  $n = 6$ ) and the GICs half-width  
468 ( $0.57 \pm 0.28$  s vs  $1.01 \pm 0.34$  s at  $30$   $\mu$ M, and  $1.32 \pm 0.34$  s at  $300$   $\mu$ M,  $n = 6$ ) (Figures 12 B1  
469 and B2). When analyzing GDPs, we observed a strong increase of their half-width in the  
470 presence of 4-AP ( $1.9 \pm 0.4$  s vs  $3.8 \pm 1.3$  s at  $30$   $\mu$ M, and  $3.6 \pm 1.1$  s at  $300$   $\mu$ M,  $n = 8$ ) but no  
471 significant change in their amplitude ( $30.5 \pm 7.2$  mV vs  $32.6 \pm 6.4$  mV at  $30$   $\mu$ M and  $33.4 \pm$   
472  $7.2$  mV at  $300$   $\mu$ M,  $n = 8$ ), nor in the firing rate of MNs (Figures 12 C1 and C2). Increasing  
473 the proportion of GABAergic INs that sustain repetitive firing or plateau potential activity  
474 likely enhances the release of GABA on MNs as exemplified by the increased evoked  
475 GABAergic current on MNs. However, the lack of effects on GDP amplitude and on MN

476 firing indicates that the biophysical properties of MNs buffer variations in the intensity of  
477 their GABAergic inputs. This is likely due to a combination of the depolarized equilibrium  
478 potential of chloride at this embryonic age ( $E_{Cl} = -30$  mV; (Allain et al 2011)) and the  
479 relatively high input resistance of E12.5 MNs (0.3-1 G $\Omega$ ) (Czarnecki et al 2014)), allowing  
480 relatively small changes in GABAergic conductance to evoke a voltage response with  
481 maximum amplitude. Such a process probably contributes to the robustness of MN activity  
482 during episodes of SNA.

## 483 **Discussion**

484  $V1^R$  constitute a homogeneous population in terms of their transcription factor program  
485 during development (Benito-Gonzalez & Alvarez 2012, Stam et al 2012), their physiological  
486 function (Eccles et al 1956) and their firing pattern at postnatal stages (Bikoff et al 2016).  
487 Surprisingly, our electrophysiological recordings and our cluster analysis clearly indicate that  
488 distinct functional classes of  $V1^R$  are transiently present during development at the onset of  
489 the SNA (E11.5-E12.5). Five different groups of embryonic  $V1^R$  were defined using cluster  
490 analysis, according to their firing properties.

491

### 492 *Development of the firing pattern of embryonic $V1^R$ during SNA*

493 It is generally assumed that, during early development, newborn neurons cannot sustain  
494 repetitive firing (Pineda & Ribera 2010, Spitzer et al 2000). Later on, neurons progressively  
495 acquire the ability to fire repetitively, APs become sharper, and neurons eventually reach their  
496 mature firing pattern, due to the progressive appearance of a panoply of voltage-gated  
497 channels with different kinetics (Moody & Bosma 2005, Pineda & Ribera 2010, Spitzer et al  
498 2000). Our results challenge the general view that single spiking is a more immature form of  
499 excitability (Pineda & Ribera 2010). Indeed, we show that repetitive firing and plateau  
500 potentials dominated at early stages (E11.5-E12.5), single spiking prevailing only later  
501 (E13.5- E16.5).

502 The different  $V1^R$  firing patterns observed at E11.5-E12.5 might reflect variability in the  
503 maturation level between  $V1^R$  at a given developmental stage, as suggested for developing  
504 MNs (Durand et al 2015, Vinay et al 2000). However, this is unlikely since  $V1^R$  transiently  
505 lose their ability to sustain tonic firing or plateau potential after E13.5. The heterogeneous  
506 discharge patterns of  $V1^R$  observed before E13.5 contrasts with the unique firing pattern of  
507  $V1^R$  at postnatal age (Bikoff et al 2016). Accordingly, the transient functional heterogeneity

508 of  $V1^R$  rather reflects an early initial developmental stage (E11.5-E13.5) of intrinsic  
509 excitability-

510 The physiological meaning of the transient functional involution of  $V1^R$  that follows, after  
511 E12.5, is puzzling. To our knowledge, such a phenomenon was never described in vertebrates  
512 during CNS development. So far, a functional involution was described only for inner hair  
513 cells between E16 and P12 (Marcotti et al 2003a, Marcotti et al 2003b) and cultured  
514 oligodendrocytes (Sontheimer et al 1989), and it was irreversible. Because most  $V1^R$  cannot  
515 sustain tonic firing after E12.5, it is likely that their participation to SNA is limited to the  
516 developmental period before other GABAergic interneuron subtypes mature and start to  
517 produce GABA and glycine (Allain et al 2004). Interestingly, embryonic  $V1^R$  begin to  
518 recover their capability to sustain tonic firing when locomotor-like activity emerges (Myers et  
519 al 2005, Yvert et al 2004), a few days before they form their recurrent synaptic loop with  
520 MNs (around E18.5 in the mouse embryos, (Sapir et al 2004)). One possible function of the  
521 transient involution between E12.5 and E15.5 could be to regulate the growth of  $V1^R$  axons  
522 toward their targets. It is indeed known that low calcium fluctuations within growth cones are  
523 required for axon growth while high calcium fluctuations stop axon growth and promote  
524 growth cone differentiation (Henley & Poo 2004).

525

### 526 ***Ion channels mechanisms underlying the functional heterogeneity of embryonic $V1^R$***

527 Blockade of  $I_{Nap}$  leads to single spiking (Boeri et al 2018), which emphasizes the  
528 importance of this current for the occurrence of repetitive firing and plateau potentials in  $V1^R$   
529 at early development stages. But these neurons can also switch from one firing pattern to  
530 another, when  $G_{Kdr}$  is decreased by 4-AP, which emphasizes the importance of  $I_{Kdr}$ . We  
531 found that the main determinant of embryonic  $V1^R$  firing pattern is the balance between  
532  $G_{Nap}$  and  $G_{Kdr}$ .

533 A Hodgkin-Huxley-like model incorporating a persistent sodium current  $I_{Nap}$  provided a  
534 parsimonious explanation of all the firing patterns recorded in the  $V1^R$  population at E12.5,  
535 even in details. It provided a mathematical interpretation for the clustering of embryonic  $V1^R$   
536 shown by the hierarchical analysis and accounted for the effect of 4-AP and riluzole (Boeri et  
537 al 2018) on the discharge. Remarkably, it highlights how a simple mechanism involving only  
538 the two opposing currents  $I_{Nap}$  and  $I_{Kdr}$  can produce functional diversity in a population of  
539 developing neurons. The model explains why minimal  $G_{Nap}$  and  $G_{Kdr}$  are required for firing,  
540 how a synergy between  $G_{Nap}$  and  $G_{Kdr}$  controls the firing pattern, and it accounts for the  
541 zonation of the  $G_{Nap} - G_{Kdr}$  plane that is observed experimentally.

542 Adding the slow inactivation of  $I_{Nap}$  to the model allowed us to account for the bursting  
543 patterns displayed by cells of the PP and ME clusters. We showed, in particular, that mixed  
544 events arose from elliptic bursting at the repetitive spiking-plateau transition and that smooth  
545 repetitive plateaus could be explained by a pseudo-plateau bursting mechanism (Osinga &  
546 Tsaneva-Atanasova 2010, Teka et al 2011). Such bursting scenario has been previously  
547 studied in models of endocrine cells (Stern et al 2008, Tagliavini et al 2016, Tsaneva-  
548 Atanasova et al 2010) and adult neurons (Oster et al 2015), but rarely observed in experiments.

549 Heterogeneity of the discharge pattern of pacemaker neurons has also been observed in the  
550 embryonic pre-Bötzing network (Chevalier et al 2016). However, it is related there to the  
551 gradual change of balance between two inward currents,  $I_{Nap}$  and the calcium-activated  
552 nonselective cationic current  $I_{CAN}$ , during neuronal maturation, which leads to the progressive  
553 replacement of pseudo-plateau bursting by elliptic bursting. Such a scenario cannot account  
554 for the variety of discharge patterns observed in embryonic  $V1^R$  at the E11.5-12.5 stage of  
555 development (Boeri et al 2018). Our theoretical analysis and our experimental data clearly  
556 indicate that competition and synergy between two opposing currents are necessary to explain  
557 all the firing patterns of  $V1^R$ . We also note that our model is not restricted to embryonic  $V1^R$ ,



558 but may also apply to any electrically compact cell, the firing activity of which is dominated  
559 by sodium and delayed rectifier potassium currents. This is the case of many classes of  
560 embryonic cells in mammals at an early stage of their development.

561 Altogether our experimental and theoretical results provide a global view of the  
562 developmental trajectories of embryonic  $V1^R$  (see Figures 9F and 9G). At E12.5,  
563 conductances of embryonic  $V1^R$  are widely spread in the  $G_{Nap} - G_{Kdr}$  plane, which explains  
564 the heterogeneity of their firing patterns. This likely results from the random and uncorrelated  
565 expression of sodium and potassium channels from cell to cell at this early stage. Between  
566 E12.5 and E14.5-15.5 cell size increases, and  $G_{Kdr}$  with it, while the density of sodium  
567 channels decreases (see Figures 6 and 9). The functional involution displayed by  $V1^R$  between  
568 E12.5 and E15.5 thus mainly results from a decrease of  $G_{Nap}$  coordinated with an increase of  
569  $G_{Kdr}$ . How these synergistic processes are controlled during this developmental period  
570 remains an open issue.

571

### 572 ***Physiological implications of the $G_{Nap} - G_{Kdr}$ synergy in $V1^R$ at the onset of the SNA***

573 The increase in GABA-ergic GIC amplitude and duration in the presence of 4-AP suggests  
574 that 4-AP, by changing the  $G_{Nap} / G_{Kdr}$  ratio and the input conductance increases embryonic  
575  $V1^R$  excitability, which in turn augments GABA release onto MNs. This fits with the view  
576 according to which repetitive firing is more efficient than single spiking at evoking calcium  
577 entry and promoting vesicular release at presynaptic terminals, plateau potentials being even  
578 more efficient (Hallermann & Silver 2013, Tibbs et al 1989, Wang & Kaczmarek 1998). It  
579 must however be noted that although 4-AP increased GDP duration, this potassium blocker  
580 had little effect on GDP amplitude and on MN firing, indicating that MN activity is poorly  
581 affected by variations in GABA release. This can be explained by the depolarized equilibrium  
582 potential of chloride ions at this developmental age (-30 mV) (Delpy et al 2008) and by the

583 high input resistance of MNs, which limits the number of activated GABA<sub>A</sub> receptors needed  
584 for generating a GDP of maximal amplitude. In addition, most MNs are not able to sustain  
585 tonic firing during a GDP at E12.5 (Czarnecki et al 2014), which prevents increase in GDP  
586 duration from increasing MN firing rate.

587 Due to their functional involution V1<sup>R</sup> must become less efficient to generate GABAergic  
588 GICs on MNs after E12.5. However, this is unlikely to impact SNA on MNs since V1<sup>R</sup> lose  
589 their ability to sustain tonic firing at a time when other interneurons begin to produce GABA  
590 (Allain et al 2011). We cannot completely rule out that some other INs than V1<sup>R</sup> were also  
591 affected by 4-AP application already at E12.5, but it is important to note that V1<sup>R</sup> are the first  
592 INs contacting MNs and producing GABA at this age in the embryonic SC (Boeri et al 2018),  
593 which makes them the best candidates to explain the effect of 4-AP.

594 Our model is not restricted to embryonic V1<sup>R</sup>. It may also apply to any electrically  
595 compact cell or to the axon initial segment where  $G_{Nap}$  and  $G_{Kdr}$  play a major role in the  
596 occurrence of repetitive firing (Kole & Stuart 2012). It is noteworthy that, even though the  
597 nature of the firing pattern is determined only by the synergy of  $G_{Nap}$  and  $G_{Kdr}$  in our model,  
598 its quantitative features also depend on the input conductance. This implies that changes in  
599  $G_{input}$  evoked by local synaptic activity may alter the firing pattern of the postsynaptic neurons.  
600 Interestingly, the initial segment of cortical and hippocampal pyramidal neurons receive  
601 GABAergic inputs (Kole & Stuart 2012).

602

### 603 ***Conclusions***

604 In conclusion, our results indicate for the first time that a single mechanism involving two  
605 classes of ubiquitous voltage-gated channels with opposite functions that are ubiquitous in  
606 neurons is sufficient to produce functional diversity between neurons. It accounts for the

607 unusual developmental pattern of immature V1<sup>R</sup> during the important time window where  
608 SNA is expressed in the embryonic spinal cord.

609

## 610 **Materials and Methods**

### 611 *Isolated spinal cord preparation.*

612 Experiments were performed in accordance with European Community guiding principles  
613 on the care and use of animals (86/609/CEE, CE Off J no. L358, 18 December 1986), French  
614 decree no. 97/748 of October 19, 1987 (J Off République Française, 20 October 1987, pp.  
615 12245-12248). All procedures were carried out in accordance with the local ethics committee  
616 of local Universities and recommendations from the CNRS. We used GAD67eGFP knock-in  
617 mice to visualize putative GABAergic INs (Tamamaki et al 2003), as in our previous study  
618 (Boeri et al 2018). To obtain E12.5-E16.5 transgenic GAD67-eGFP embryos, 8 to 12 weeks  
619 old wild-type Swiss female mice were crossed with GAD67-eGFP Swiss male mice.

620 Isolated mouse SCs from 420 embryos were used in this work and obtained as previously  
621 described (Delpy et al 2008, Scain et al 2010). Briefly, pregnant mice were anesthetized by  
622 intramuscular injection of a mix of ketamine and xylazine and sacrificed using a lethal dose of  
623 CO<sub>2</sub> after embryos of either sex were removed. Whole SCs were isolated from eGFP-positive  
624 embryos and maintained in an artificial cerebrospinal fluid (ACSF) containing 135 mM NaCl,  
625 25 mM NaHCO<sub>3</sub>, 1 mM NaH<sub>2</sub>PO<sub>4</sub>, 3 mM KCl, 11 mM glucose, 2 mM CaCl<sub>2</sub>, and 1 mM  
626 MgCl<sub>2</sub> (307 mOsm/kg H<sub>2</sub>O), continuously bubbled with a 95% O<sub>2</sub>-5% CO<sub>2</sub> gas mixture.

627 In the lumbar SC of GAD67eGFP mouse embryos, eGFP neurons were detected using 488  
628 nm UV light. They were localized in the ventro-lateral marginal zone between the motor  
629 columns and the ventral funiculi (Stam et al 2012). Embryonic V1<sup>R</sup> identity was confirmed by  
630 the expression of the forkhead transcription factor Foxd3 (Boeri et al 2018).

631

### 632 *Whole-cell recordings and analysis*

633 The isolated SC was placed in a recording chamber and was continuously perfused (2

634 ml/min) at room temperature (22-26°C) with oxygenated ACSF. Whole-cell patch-clamp  
635 recordings of lumbar spinal embryonic V1<sup>R</sup> were carried out under direct visualization using  
636 an infrared-sensitive CCD video camera. Whole-cell patch-clamp electrodes with a resistance  
637 of 4-7 MΩ were pulled from thick-wall borosilicate glass using a P-97 horizontal puller  
638 (Sutter Instrument Co., USA). They were filled with a solution containing (in mM): 96.4 K  
639 methanesulfonate, 33.6 KCl, 4 MgCl<sub>2</sub>, 4 Na<sub>2</sub>ATP, 0.3 Na<sub>3</sub>GTP, 10 EGTA, and 10 HEPES  
640 (pH 7.2; 290 mOsm/kg-H<sub>2</sub>O). This intracellular solution led to an equilibrium potential of  
641 chloride ions,  $E_{Cl}$ , of about -30 mV, close to the physiological values measured at E12.5 in  
642 spinal MNs (Delpy et al 2008). The junction potential (6.6 mV) was systematically corrected  
643 offline.

644 Signals were recorded using Multiclamp 700B amplifiers (Molecular Devices, USA). Data  
645 were low-pass filtered (2 kHz), digitized (20 kHz) online using Digidata 1440A or 1550B  
646 interfaces and acquired using pCLAMP 10.5 software (Molecular Devices, USA). Analyses  
647 were performed off-line using pCLAMP 10.5 and Axograph 1.7.2 (Molecular devices;  
648 RRID:SCR\_014284) software packages.

649 In voltage-clamp mode, voltage-dependent K<sup>+</sup> currents ( $I_{Kv}$ ) were elicited by 500 ms  
650 depolarizing voltage steps (10 mV increments, 10 s interval) after a prepulse of 300 ms at  $V_H$   
651 = -100 mV. To isolate  $I_{Kdr}$ , voltage steps were applied after a 300 ms prepulse at  $V_H$  = -30  
652 mV that inactivated the low threshold transient potassium current  $I_A$ .  $I_A$  was then obtained by  
653 subtracting offline  $I_{Kdr}$  from the total potassium current  $I_{Kv}$ . Capacitance and leak current  
654 were subtracted using on-line P/4 protocol provided by pCLAMP 10.5.

655 In current-clamp mode, V1<sup>R</sup> discharge was elicited using 2 s depolarizing current steps  
656 (from 0 to ≈ 50 pA in 5-10 pA increments, depending on the input resistance of the cell) with  
657 an 8 s interval to ensure that the membrane potential returned to  $V_H$ . When a cell generated a

658 sustained discharge, the intensity of the depolarizing pulse was reduced to the minimal value  
659 compatible with repetitive firing.

660  $I_{Nap}$  was measured in voltage-clamp mode using a 70 mV/s depolarizing voltage ramp  
661 (Huang & Trussell 2008). This speed was slow enough to preclude substantial contamination  
662 by the inactivating transient current and fast enough to avoid substantial inactivation of  $I_{Nap}$ .  
663 Subtraction of the current evoked by the voltage ramp in the presence of 1  $\mu$ M tetrodotoxin  
664 (TTX) from the control voltage ramp-evoked current revealed  $I_{Nap}$ .

665

### 666 ***Pharmacological reagents***

667 During patch-clamp recordings, bath application of TTX (1  $\mu$ M, Alomone, Israel) or 4-AP  
668 (0.3 - 600  $\mu$ M, Sigma) was done using 0.5 mm diameter quartz tubing positioned, under direct  
669 visual control, 50  $\mu$ m away from the recording area. The quartz tubing was connected to 6  
670 solenoid valves linked with 6 reservoirs *via* a manifold. Solutions were gravity-fed into the  
671 quartz tubing. Their application was controlled using a VC-8 valve controller (Warner  
672 Instruments, USA).

673 4-aminopyridine (4-AP; Sigma Aldrich, USA) was used to block  $I_{Kdr}$ . To determine the  
674 concentration–response curve,  $I - V$  curves of  $I_{Kdr}$  for different concentrations of 4-AP (0.3  
675 to 300  $\mu$ M) were compared to the control curve obtained in the absence of 4-AP. The  
676 percentage of inhibition for a given concentration was calculated by dividing the peak  
677 intensity of  $I_{Kdr}$  by the peak value obtained in control condition. The obtained normalized  
678 concentration–response curves were fitted using the Hill equation:

$$679 \frac{100 - I_{min}}{1 + ([4-AP]/IC_{50})^{n_H}} + I_{min} ,$$

680 where [4-AP] is the 4-AP concentration,  $I_{min}$  is the residual current (in percentage of the peak  
681  $I_{Kdr}$ ),  $100 - I_{min}$  is the maximal inhibition achieved for saturating concentration of 4-AP,

682  $IC_{50}$  is the 4-AP concentration producing half of the maximal inhibition, and  $n_H$  is the Hill  
683 coefficient. Curve fitting was performed using KaleidaGraph 4.5 (Synergy Software, USA).

684

### 685 ***Immunohistochemistry and confocal microscopy***

686 E14.5 embryos were collected from pregnant females. Once dissected out of their yolk sac,  
687 SCs were dissected and immediately immersion-fixed in phosphate buffer (PB 0.1 M)  
688 containing 4% paraformaldehyde (PFA; freshly prepared in PB, pH 7.4) for 1 h at 4°C. Whole  
689 SCs were then rinsed out in 0.12 M PB at 4°C, thawed at room temperature, washed in PBS,  
690 incubated in  $NH_4Cl$  (50 mM), diluted in PBS for 20 min and then permeabilized for 30 min in  
691 a blocking solution (10% goat serum in PBS) with 0.2% Triton X-100. They were incubated  
692 for 48 h at 4°C in the presence of the following primary antibodies: guinea pig anti-FoxD3  
693 (1:5000, gift from Carmen Birchmeier and Thomas Müller of the Max Delbrück Center for  
694 Molecular Medicine in Berlin) and rabbit anti-cleaved Caspase-3 (1:1000, Cell Signaling  
695 Technology Cat# 9661, RRID:AB\_2341188). SCs were then washed in PBS and incubated  
696 for 2 h at RT with secondary fluorescent antibodies (goat anti-rabbit-conjugated 649; donkey  
697 anti-guinea pig-conjugated Alexa Fluor 405 [1:1000, ThermoFisher]) diluted in 0.2% Triton  
698 X-100 blocking solution. After washing in PBS, SCs were dried and mounted in Mowiol  
699 medium (Millipore, Molsheim, France). Preparations were then imaged using a Leica SP5  
700 confocal microscope. Immunostaining was observed using a 40X oil-immersion objective  
701 with a numerical aperture of 1.25, as well as with a 63X oil-immersion objective with a  
702 numerical aperture of 1.32. Serial optical sections were obtained with a Z-step of 1  $\mu m$  (40X)  
703 and 0.2-0.3  $\mu m$  (63X). Images (1024x1024; 12-bit color scale) were stored using Leica  
704 software LAS-AF and analyzed using ImageJ 1.5 (N.I.H., USA; <http://rsb.info.nih.gov/ij/>) and  
705 Adobe Photoshop CS6 (Adobe, USA) software.

706

707 ***Cluster analysis***

708 To classify the firing patterns of embryonic  $V1^R$ , we performed a hierarchical cluster  
709 analysis on a population of 163 cells. Each cell was characterized by three quantitative  
710 measures of its firing pattern (see legend of Fig 1). After normalizing these quantities to zero  
711 mean and unit variance, we performed a hierarchical cluster analysis using the `hclust` function  
712 in R software (version 3.3.2, <https://cran.r-project.org/>) that implements the complete linkage  
713 method. The intercluster distance was defined as the maximum Euclidean distance between  
714 the points of two clusters, and, at each step of the process, the two closest clusters were  
715 merged into a single one, thus constructing progressively a dendrogram. Clusters were then  
716 displayed in data space using the `dendromat` function in the R package ‘squash’ dedicated to  
717 color-based visualization of multivariate data. The best clustering was determined using the  
718 silhouette measure of clustering consistency (Rousseeuw 1987). The silhouette of a data point,  
719 based on the comparison of its distance to other points in the same cluster and to points in the  
720 closest cluster, ranges from -1 to 1. A value near 1 indicates that the point is well assigned to  
721 its cluster, a value near 0 indicates that it is close to the decision boundary between two  
722 neighboring clusters, and negative values may indicate incorrect assignment to the cluster.  
723 This allowed us to identify an optimal number  $k$  of clusters by maximizing the overall  
724 average silhouette over a range of possible values for  $k$  (Rousseeuw 1987), using the  
725 silhouette function in the R package ‘cluster’.

726

727 ***Biophysical modeling***

728 To understand the relationship between the voltage-dependent membrane conductances  
729 and the firing patterns of embryonic  $V1^R$ , we relied on a single compartment conductance  
730 based model that included the leak current, the transient and persistent components of the



731 sodium current,  $I_{Nat}$  and  $I_{Nap}$ , and a delayed rectifier potassium current  $I_{Kdr}$ . Voltage  
732 evolution then followed the equation

$$733 \quad C_{in} \frac{dV}{dt} = G_{in}(V_H - V) + G_{Nat}m^3h(E_{Na} - V) + G_{Nap}m_p^3(E_{Na} - V) + G_{Kdr}n^3(E_K - V) + I \quad (1),$$

734 where  $C_{in}$  was the input capacitance;  $G_{in}$  the input conductance;  $G_{Nat}$ ,  $G_{Nap}$ ,  $G_{Kdr}$  the  
735 maximal conductances of the aforementioned currents;  $m$ ,  $m_p$  and  $n$  their activation variables;  
736  $h$  the inactivation variable of  $I_{Nat}$ ;  $V_H$  the baseline potential imposed by *ad hoc* current  
737 injection in current-clamp experiments;  $E_{Na}$  and  $E_K$  the Nernst potentials of sodium and  
738 potassium ions, and  $I$  the injected current. All gating variables satisfied equations of the form:

$$739 \quad \tau_x \frac{dx}{dt} = x_\infty(V) - x,$$

740 where the (in)activation curves were sigmoid functions of the form:

$$741 \quad x_\infty = \frac{1}{1 + \exp(-(V - V_x)/k_x)}$$

742 with  $k_x$  being positive for activation and negative for inactivation. The time constant  $\tau_x$  was  
743 voltage-independent except for the inactivation variable  $h$ .

744 To take into account the inactivating potassium current  $I_A$  revealed by experiments, we  
745 also considered a model with the additional term  $G_A m_A h_A (E_K - V)$  added to the right-hand-  
746 side of equation (1). The activation variable  $m_A$  of  $I_A$  was assumed to follow any voltage  
747 change instantaneously while its inactivation variable evolved more slowly.

748 To explain the more complex activity patterns observed in 27 % of the cells, we added a  
749 slow inactivation variable  $s$  to  $I_{Nap}$ , which became  $G_{Nap} m_p^3 s (V_{Na} - V)$ . We considered that  
750 the corresponding time constant  $\tau_s$  could be voltage-dependent.

751 The effect of channel noise was investigated with a stochastic realization of the model,  
752 where channels kinetics were described by Markov-type models, assuming a unitary channel  
753 conductance of 10 pS for all channels.

754 Most model parameters were chosen on the basis of experimental measurements (see S1  
755 File). Parameters that could not be constrained from our experimental data were chosen from  
756 an experimentally realistic range of values.

757

### 758 ***Choice of model parameters***

759  $V_H$  was set to  $-60$  mV.  $C_{in}$  (average 13.15 pF, 50% between 11.9 and 15.1 pF, only 18  
760 cells out of 246 in the first quartile below 7.2 pF or in the fourth quartile above 19 pF) and  
761  $G_{in}$  (50% of cells between 0.71 and 1.18 nS, only 7 out of 242 with input conductance above  
762 2 nS) were not spread much in the cells recorded at E12.5, showing that most embryonic V1<sup>R</sup>  
763 were of comparable size. Interestingly,  $C_{in}$  and  $G_{in}$  were not correlated, which indicated that  
764 the input conductance was determined by the density of leak channels rather than by the sheer  
765 size of the cell. Moreover, no correlation was observed between the passive properties and the  
766 firing pattern (Boeri et al 2018). Therefore, we always set  $G_{in}$  and  $C_{in}$  to 1 nS and 13 pF in  
767 the model (except in Figure 10-Figure supplement 2), close to the experimental medians (0.96  
768 nS and 13.15 pF, respectively). The membrane time constant  $C_{in}/G_{in}$  was then equal to 13  
769 ms, which was also close to the experimental median (13.9 ms, N=241).

770  $E_{Na}$  was set to a standard value of 50 mV. The activation curve of  $I_{Nap}$  was obtained by  
771 fitting experimental data, leading to a mid-activation of -33 mV and a steepness of 11 mV.  
772 The experimentally measured values of  $G_{Nap}$  were in the range 0-2.2 nS. We assumed that the  
773 activation curve of  $I_{Nat}$  was shifted rightward by 6 mV in comparison to  $I_{Nap}$ . No  
774 experimental data was available for the inactivation of  $I_{Nat}$ . We chose a mid-inactivation  
775 voltage  $V_h = -45$  mV and a steepness  $k_h = -5$  mV. We also assumed that the activation time  
776 constant of both  $I_{Nat}$  and  $I_{Nap}$  was 1.5 ms, and that the inactivation time constant was  
777 voltage-dependent:  $\tau_h(V) = 16.5 - 13.5 \tanh((V + 20)/15)$ , decreasing by one order of  
778 magnitude (from 30 ms down to 3 ms) with the voltage increase. This enabled us to account

779 for the shape of the action potentials recorded in experiments, showing a slow rise time and  
780 rather long duration. The conductance  $G_{Nat}$  was not measured experimentally. When  
781 choosing a reasonable value of 25 nS for  $G_{Nat}$ , the model behaved very much as recorded  
782 embryonic V1<sup>R</sup>: similar current threshold (typically 10-20 pA) and stable plateau potential  
783 obtained for the largest values of  $G_{Nap}$ .

784 When investigating how repetitive plateaus were generated (see Fig 10C), we chose  $V_s = -$   
785 30 mV for the mid-inactivation of  $I_{Nap}$  and set the steepness  $k_s$  at -5 mV (as for the  
786 inactivation of  $I_{Nat}$ ). To account for mixed events (and oscillatory plateaus, see Fig 10D), we  
787 had to shift the inactivation curve ( $V_s = -20$  mV) and make it less steep ( $k_s = -15$  mV), so as  
788 to ensure sufficient de-inactivation of  $I_{Nap}$  during spiking episodes.

789  $E_K$  was set to a standard value of -80 mV. The activation parameters of  $I_{Kdr}$  were obtained  
790 by fitting the experimental data:  $V_n = -20$  mV,  $k_n = 20$  mV,  $\tau_n = 10$  ms and an activation  
791 exponent of 3. The activation and inactivation properties of  $I_A$  were also chosen based on  
792 experimental measurements. Accordingly,  $V_{m_A} = -30$  mV,  $k_{m_A} = -12$  mV,  $V_{h_A} = -70$  mV,  
793  $k_{h_A} = -7$  mV, and  $\tau_{h_A} = 23$  ms. We assumed that  $G_A = G_{Kdr}$ , consistently with experimental  
794 data (see S8 Fig A).

795

## 796 *Numerical simulations and dynamical systems analysis*

797 We integrated numerically the deterministic model using the freeware XPPAUT  
798 (Ermentrout 2002) and a standard fourth-order Runge-Kutta algorithm. XPPAUT was also  
799 used to compute one-parameter and two-parameters bifurcation diagrams. The stochastic  
800 version of the model was also implemented in XPPAUT and computed with a Gillespie's  
801 algorithm (Gillespie 1976).

802 To investigate the dynamics of the model with slow inactivation of  $I_{Nap}$ , we relied on  
803 numerical simulations together with fast/slow dynamics analysis (Witelski & Bowen 2015).

804 In this approach, one distinguishes slow dynamical variables (here only  $s$ ) and fast dynamical  
805 variables. Slow variables vary little at the time scale of fast variables and may therefore be  
806 considered as constant parameters of the fast dynamics in first approximation. In contrast,  
807 slow variables are essentially sensitive to the time average of the fast variables, much more  
808 than to their instantaneous values. This separation of time scales allows one to conduct a  
809 phase plane analysis of the full dynamics.

810

### 811 *Statistics*

812 All values were expressed as mean  $\pm$  SEM. Statistical significance was assessed by non-  
813 parametric Kruskal-Wallis test with Dunn's post hoc test, Mann-Whitney test or Wilcoxon  
814 matched pairs test (GraphPad Prism 5.0 Software, USA). Significant changes in the  
815 proportions of firing patterns with age were assessed by chi-square test for large sample and  
816 by Fisher's exact test for small sample. Significance was determined at  $P < 0.05$ .

817 **Acknowledgments**

818 We thank Susanne Bolte, Jean-François Gilles and France Lam for assistance with confocal  
819 imaging (IBPS imaging facility) and IBPS rodent facility team for animal care and  
820 production. We thank University Paris Descartes for hosting Yulia Timofeeva as an invited  
821 professor. This work was supported by INSERM, CNRS, Sorbonne Université (Paris),  
822 Université de Bordeaux, Université Paris Descartes and Fondation pour la Recherche  
823 Médicale.

824

825 **Declaration of Interests**

826 The authors declare no competing interests

## 827 **References**

- 828 Allain AE, Bairi A, Meyrand P, Branchereau P. 2004. Ontogenic changes of the GABAergic  
829 system in the embryonic mouse spinal cord. *Brain research* 1000: 134-47
- 830 Allain AE, Le Corrionc H, Delpy A, Cazenave W, Meyrand P, et al. 2011. Maturation of the  
831 GABAergic transmission in normal and pathologic motoneurons. *Neural plasticity*  
832 2011: 905624
- 833 Allain AE, Segu L, Meyrand P, Branchereau P. 2010. Serotonin controls the maturation of the  
834 GABA phenotype in the ventral spinal cord via 5-HT1b receptors. *Annals of the New*  
835 *York Academy of Sciences* 1198: 208-19
- 836 Alvarez FJ, Benito-Gonzalez A, Siembab VC. 2013. Principles of interneuron development  
837 learned from Renshaw cells and the motoneuron recurrent inhibitory circuit. *Annals of*  
838 *the New York Academy of Sciences* 1279: 22-31
- 839 Angelim M, Maia L, Mouffle C, Ginhoux F, Low D, et al. 2018. Embryonic macrophages and  
840 microglia ablation alter the development of dorsal root ganglion sensory neurons in  
841 mouse embryos. *Glia* 66: 2470-86
- 842 Baer SM, Erneux T, Rinzel J. 1989. The Slow Passage through a Hopf Bifurcation: Delay,  
843 Memory Effects, and Resonance  
844 . *SIAM Journal on Applied Mathematics* 49: 55-71
- 845 Ballion B, Branchereau P, Chapron J, Viala D. 2002. Ontogeny of descending serotonergic  
846 innervation and evidence for intraspinal 5-HT neurons in the mouse spinal cord. *Brain*  
847 *research. Developmental brain research* 137: 81-8
- 848 Belleau ML, Warren RA. 2000. Postnatal development of electrophysiological properties of  
849 nucleus accumbens neurons. *Journal of neurophysiology* 84: 2204-16
- 850 Benito-Gonzalez A, Alvarez FJ. 2012. Renshaw cells and Ia inhibitory interneurons are  
851 generated at different times from p1 progenitors and differentiate shortly after exiting  
852 the cell cycle. *J Neurosci* 32: 1156-70
- 853 Bertram R, Butte MJ, Kiemel T, Sherman A. 1995. Topological and phenomenological  
854 classification of bursting oscillations. *Bulletin of mathematical biology* 57: 413-39
- 855 Bikoff JB, Gabitto MI, Rivard AF, Drobac E, Machado TA, et al. 2016. Spinal Inhibitory  
856 Interneuron Diversity Delineates Variant Motor Microcircuits. *Cell* 165: 207-19
- 857 Blankenship AG, Feller MB. 2010. Mechanisms underlying spontaneous patterned activity in  
858 developing neural circuits. *Nature reviews. Neuroscience* 11: 18-29

- 859 Boeri J, Le Corrnc H, Lejeune FX, Le Bras B, Mouffle C, et al. 2018. Persistent Sodium  
860 Current Drives Excitability of Immature Renshaw Cells in Early Embryonic Spinal  
861 Networks. *J Neurosci* 38: 7667-82
- 862 Borisyuk A, Rinzel J. 2005. Understanding neuronal dynamics by geometrical dissection of  
863 minimal models In *Models and Methods in Neurophysics*, ed. C Chow, B Gutkin, D  
864 Hansel, C Meunier, J Dalibard, pp. 19-72. Proc Les Houches Summer School 2003,  
865 (Session LXXX): Elsevier
- 866 Branchereau P, Chapron J, Meyrand P. 2002. Descending 5-hydroxytryptamine raphe inputs  
867 repress the expression of serotonergic neurons and slow the maturation of inhibitory  
868 systems in mouse embryonic spinal cord. *J Neurosci* 22: 2598-606
- 869 Branchereau P, Morin D, Bonnot A, Ballion B, Chapron J, Viala D. 2000. Development of  
870 lumbar rhythmic networks: from embryonic to neonate locomotor-like patterns in the  
871 mouse. *Brain research bulletin* 53: 711-8
- 872 Chevalier M, Toporikova N, Simmers J, Thoby-Brisson M. 2016. Development of pacemaker  
873 properties and rhythmogenic mechanisms in the mouse embryonic respiratory network.  
874 *eLife* 5
- 875 Coetzee WA, Amarillo Y, Chiu J, Chow A, Lau D, et al. 1999. Molecular diversity of K<sup>+</sup>  
876 channels. *Annals of the New York Academy of Sciences* 868: 233-85
- 877 Crill WE. 1996. Persistent sodium current in mammalian central neurons. *Annual review of*  
878 *physiology* 58: 349-62
- 879 Czarnecki A, Le Corrnc H, Rigato C, Le Bras B, Couraud F, et al. 2014. Acetylcholine  
880 controls GABA-, glutamate-, and glycine-dependent giant depolarizing potentials that  
881 govern spontaneous motoneuron activity at the onset of synaptogenesis in the mouse  
882 embryonic spinal cord. *J Neurosci* 34: 6389-404
- 883 Delpy A, Allain AE, Meyrand P, Branchereau P. 2008. NKCC1 cotransporter inactivation  
884 underlies embryonic development of chloride-mediated inhibition in mouse spinal  
885 motoneuron. *J Physiol* 586: 1059-75
- 886 Durand J, Filipchuk A, Pambo-Pambo A, Amendola J, Borisovna Kulagina I, Gueritaud JP.  
887 2015. Developing electrical properties of postnatal mouse lumbar motoneurons.  
888 *Frontiers in cellular neuroscience* 9: 349
- 889 Eccles JC, Fatt P, Landgren S. 1956. The inhibitory pathway to motoneurons. *Progress in*  
890 *neurobiology*: 72-82

- 891 Ermentrout B. 2002. *Simulating, Analyzing, and Animating Dynamical Systems: A Guide to*  
892 *XPPAUT for Researchers and Students*. pp. xiii + 298. Philadelphia: Society for  
893 Industrial and Applied Mathematics.
- 894 Gao BX, Ziskind-Conhaim L. 1998. Development of ionic currents underlying changes in  
895 action potential waveforms in rat spinal motoneurons. *Journal of neurophysiology* 80:  
896 3047-61
- 897 Gao H, Lu Y. 2008. Early development of intrinsic and synaptic properties of chicken nucleus  
898 laminaris neurons. *Neuroscience* 153: 131-43
- 899 Gillespie DT. 1976. A general method for numerically simulating the stochastic time  
900 evolution of coupled chemical reactions. *Journal of Computational Physics* 22: 403-  
901 34
- 902 Gutman GA, Chandy KG, Grissmer S, Lazdunski M, McKinnon D, et al. 2005. International  
903 Union of Pharmacology. LIII. Nomenclature and molecular relationships of voltage-  
904 gated potassium channels. *Pharmacological reviews* 57: 473-508
- 905 Hallermann S, Silver RA. 2013. Sustaining rapid vesicular release at active zones: potential  
906 roles for vesicle tethering. *Trends in neurosciences* 36: 185-94
- 907 Hanson MG, Landmesser LT. 2003. Characterization of the circuits that generate spontaneous  
908 episodes of activity in the early embryonic mouse spinal cord. *J Neurosci* 23: 587-600
- 909 Hanson MG, Landmesser LT. 2004. Normal patterns of spontaneous activity are required for  
910 correct motor axon guidance and the expression of specific guidance molecules.  
911 *Neuron* 43: 687-701
- 912 Hanson MG, Landmesser LT. 2006. Increasing the frequency of spontaneous rhythmic  
913 activity disrupts pool-specific axon fasciculation and pathfinding of embryonic spinal  
914 motoneurons. *J Neurosci* 26: 12769-80
- 915 Hanson MG, Milner LD, Landmesser LT. 2008. Spontaneous rhythmic activity in early chick  
916 spinal cord influences distinct motor axon pathfinding decisions. *Brain Res Rev* 57:  
917 77-85
- 918 Henley J, Poo MM. 2004. Guiding neuronal growth cones using Ca<sup>2+</sup> signals. *Trends in cell*  
919 *biology* 14: 320-30
- 920 Holden S, Erneux T. 1993. Slow Passage Through a Hopf Bifurcation: From Oscillatory to  
921 Steady State Solutions. *SIAM Journal on Applied Mathematics* 53: 1045-58
- 922 Huang H, Trussell LO. 2008. Control of presynaptic function by a persistent Na(+) current.  
923 *Neuron* 60: 975-9



- 924 Izhikevich EM. 2000a. Neural excitability, spiking and bursting. *Int. J. Bifurcation Chaos* 10:  
925 1171-266
- 926 Izhikevich EM. 2000b. Subcritical Elliptic Bursting of Bautin Type. *SIAM Journal on Applied*  
927 *Mathematics* 60: 503-35
- 928 Katz LC, Shatz CJ. 1996. Synaptic activity and the construction of cortical circuits. *Science*  
929 274: 1133-8
- 930 Khazipov R, Luhmann HJ. 2006. Early patterns of electrical activity in the developing  
931 cerebral cortex of humans and rodents. *Trends in neurosciences* 29: 414-18
- 932 Kole MH, Stuart GJ. 2012. Signal processing in the axon initial segment. *Neuron* 73: 235-47
- 933 Kuo JJ, Lee RH, Zhang L, Heckman CJ. 2006. Essential role of the persistent sodium current  
934 in spike initiation during slowly rising inputs in mouse spinal neurones. *J Physiol* 574:  
935 819-34
- 936 Liu SJ, Kaczmarek LK. 1998. The expression of two splice variants of the Kv3.1 potassium  
937 channel gene is regulated by different signaling pathways. *J Neurosci* 18: 2881-90
- 938 Liu X, Pfaff DW, Calderon DP, Tabansky I, Wang X, et al. 2016. Development of  
939 Electrophysiological Properties of Nucleus Gigantocellularis Neurons Correlated with  
940 Increased CNS Arousal. *Developmental neuroscience* 38: 295-310
- 941 Marcotti W, Johnson SL, Holley MC, Kros CJ. 2003a. Developmental changes in the  
942 expression of potassium currents of embryonic, neonatal and mature mouse inner hair  
943 cells. *J Physiol* 548: 383-400
- 944 Marcotti W, Johnson SL, Rusch A, Kros CJ. 2003b. Sodium and calcium currents shape  
945 action potentials in immature mouse inner hair cells. *J Physiol* 552: 743-61
- 946 Marmigere F, Ernfors P. 2007. Specification and connectivity of neuronal subtypes in the  
947 sensory lineage. *Nature reviews. Neuroscience* 8: 114-27
- 948 McKay BE, Turner RW. 2005. Physiological and morphological development of the rat  
949 cerebellar Purkinje cell. *J Physiol* 567: 829-50
- 950 Milner LD, Landmesser LT. 1999. Cholinergic and GABAergic inputs drive patterned  
951 spontaneous motoneuron activity before target contact. *J Neurosci* 19: 3007-22
- 952 Momose-Sato Y, Sato K. 2013. Large-scale synchronized activity in the embryonic brainstem  
953 and spinal cord. *Frontiers in cellular neuroscience* 7: 36
- 954 Moody WJ, Bosma MM. 2005. Ion channel development, spontaneous activity, and activity-  
955 dependent development in nerve and muscle cells. *Physiological reviews* 85: 883-941

- 956 Myers CP, Lewcock JW, Hanson MG, Gosgnach S, Aimone JB, et al. 2005. Cholinergic input  
957 is required during embryonic development to mediate proper assembly of spinal  
958 locomotor circuits. *Neuron* 46: 37-49
- 959 O'Donovan MJ. 1999. The origin of spontaneous activity in developing networks of the  
960 vertebrate nervous system. *Curr Opin Neurobiol* 9: 94-104
- 961 Osinga HM, Sherman A, Tsaneva-Atanasova K. 2012. Cross-Currents between Biology and  
962 Mathematics: The Codimension of Pseudo-Plateau Bursting. *Discrete and continuous  
963 dynamical systems. Series A* 32: 2853-77
- 964 Osinga HM, Tsaneva-Atanasova KT. 2010. Dynamics of plateau bursting depending on the  
965 location of its equilibrium. *Journal of neuroendocrinology* 22: 1301-14
- 966 Oster A, Faure P, Gutkin BS. 2015. Mechanisms for multiple activity modes of VTA  
967 dopamine neurons. *Frontiers in computational neuroscience* 9: 95
- 968 Ozaki S, Snider WD. 1997. Initial trajectories of sensory axons toward laminar targets in the  
969 developing mouse spinal cord. *The Journal of comparative neurology* 380: 215-29
- 970 Perry S, Gezelius H, Larhammar M, Hilscher MM, Lamotte d'Incamps B, et al. 2015. Firing  
971 properties of Renshaw cells defined by *Chrna2* are modulated by hyperpolarizing and  
972 small conductance ion currents *I<sub>h</sub>* and *ISK*. *The European journal of neuroscience* 41:  
973 889-900
- 974 Picken Bahrey HL, Moody WJ. 2003. Early development of voltage-gated ion currents and  
975 firing properties in neurons of the mouse cerebral cortex. *Journal of neurophysiology*  
976 89: 1761-73
- 977 Pineda R, Ribera A. 2010. Evolution of the Action Potential In *Evolution of Nervous Systems*,  
978 ed. JH Kaas, pp. 211-38: Elsevier Ltd
- 979 Prasad T, Wang X, Gray PA, Weiner JA. 2008. A differential developmental pattern of spinal  
980 interneuron apoptosis during synaptogenesis: insights from genetic analyses of the  
981 protocadherin-gamma gene cluster. *Development* 135: 4153-64
- 982 Pun S, Sigrist M, Santos AF, Ruegg MA, Sanes JR, et al. 2002. An intrinsic distinction in  
983 neuromuscular junction assembly and maintenance in different skeletal muscles.  
984 *Neuron* 34: 357-70
- 985 Ramoa AS, McCormick DA. 1994. Developmental changes in electrophysiological properties  
986 of LGNd neurons during reorganization of retinogeniculate connections. *J Neurosci*  
987 14: 2089-97

- 988 Rigato C, Buckinx R, Le-Corronc H, Rigo JM, Legendre P. 2011. Pattern of invasion of the  
989 embryonic mouse spinal cord by microglial cells at the time of the onset of functional  
990 neuronal networks. *Glia* 59: 675-95
- 991 Rinzel J. 1985. Bursting oscillations in an excitable membrane model In *Ordinary and*  
992 *Partial Differential Equations. Lecture Notes in Mathematics*, ed. B Sleeman, R Jarvis,  
993 pp. 304–16. Berlin, Heidelberg: Springer
- 994 Rousseeuw PJ. 1987. Silhouettes - a Graphical Aid to the Interpretation and Validation of  
995 Cluster-Analysis. *J Comput Appl Math* 20: 53-65
- 996 Saint-Amant L. 2010. Development of motor rhythms in zebrafish embryos. *Progress in*  
997 *brain research* 187: 47-61
- 998 Sapir T, Geiman EJ, Wang Z, Velasquez T, Mitsui S, et al. 2004. Pax6 and engrailed 1  
999 regulate two distinct aspects of rensaw cell development. *J Neurosci* 24: 1255-64
- 1000 Scain AL, Le Corronc H, Allain AE, Muller E, Rigo JM, et al. 2010. Glycine release from  
1001 radial cells modulates the spontaneous activity and its propagation during early spinal  
1002 cord development. *J Neurosci* 30: 390-403
- 1003 Sigworth FJ, Sine SM. 1987. Data transformations for improved display and fitting of single-  
1004 channel dwell time histograms. *Biophysical journal* 52: 1047-54
- 1005 Sillar KT, Simmers AJ, Wedderburn JF. 1992. The post-embryonic development of cell  
1006 properties and synaptic drive underlying locomotor rhythm generation in *Xenopus*  
1007 larvae. *Proceedings. Biological sciences* 249: 65-70
- 1008 Song ZM, Hu J, Rudy B, Redman SJ. 2006. Developmental changes in the expression of  
1009 calbindin and potassium-channel subunits Kv3.1b and Kv3.2 in mouse Renshaw cells.  
1010 *Neuroscience* 139: 531-8
- 1011 Sontheimer H, Trotter J, Schachner M, Kettenmann H. 1989. Channel expression correlates  
1012 with differentiation stage during the development of oligodendrocytes from their  
1013 precursor cells in culture. *Neuron* 2: 1135-45
- 1014 Spitzer NC. 2006. Electrical activity in early neuronal development. *Nature* 444: 707-12
- 1015 Spitzer NC, Vincent A, Lautermilch NJ. 2000. Differentiation of electrical excitability in  
1016 motoneurons. *Brain research bulletin* 53: 547-52
- 1017 Stam FJ, Hendricks TJ, Zhang J, Geiman EJ, Francius C, et al. 2012. Renshaw cell  
1018 interneuron specialization is controlled by a temporally restricted transcription factor  
1019 program. *Development* 139: 179-90

- 1020 Stern JV, Osinga HM, LeBeau A, Sherman A. 2008. Resetting behavior in a model of  
1021 bursting in secretory pituitary cells: distinguishing plateaus from pseudo-plateaus.  
1022 *Bulletin of mathematical biology* 70: 68-88
- 1023 Su J, Rubin J, Terman D. 2004. Effects of noise on elliptic bursters. *Nonlinearity* 17: 133-57
- 1024 Taddese A, Bean BP. 2002. Subthreshold sodium current from rapidly inactivating sodium  
1025 channels drives spontaneous firing of tuberomammillary neurons. *Neuron* 33: 587-600
- 1026 Tagliavini A, Tabak J, Bertram R, Pedersen MG. 2016. Is bursting more effective than  
1027 spiking in evoking pituitary hormone secretion? A spatiotemporal simulation study of  
1028 calcium and granule dynamics. *American journal of physiology. Endocrinology and*  
1029 *metabolism* 310: E515-25
- 1030 Tamamaki N, Yanagawa Y, Tomioka R, Miyazaki J, Obata K, Kaneko T. 2003. Green  
1031 fluorescent protein expression and colocalization with calretinin, parvalbumin, and  
1032 somatostatin in the GAD67-GFP knock-in mouse. *The Journal of comparative*  
1033 *neurology* 467: 60-79
- 1034 Teka W, Tsaneva-Atanasova K, Bertram R, Tabak J. 2011. From plateau to pseudo-plateau  
1035 bursting: making the transition. *Bulletin of mathematical biology* 73: 1292-311
- 1036 Tibbs GR, Barrie AP, Van Mieghem FJ, McMahon HT, Nicholls DG. 1989. Repetitive action  
1037 potentials in isolated nerve terminals in the presence of 4-aminopyridine: effects on  
1038 cytosolic free Ca<sup>2+</sup> and glutamate release. *Journal of neurochemistry* 53: 1693-9
- 1039 Tong H, McDearmid JR. 2012. Pacemaker and plateau potentials shape output of a  
1040 developing locomotor network. *Current biology : CB* 22: 2285-93
- 1041 Tsaneva-Atanasova K, Osinga HM, Riess T, Sherman A. 2010. Full system bifurcation  
1042 analysis of endocrine bursting models. *Journal of theoretical biology* 264: 1133-46
- 1043 Vinay L, Brocard F, Clarac F. 2000. Differential maturation of motoneurons innervating ankle  
1044 flexor and extensor muscles in the neonatal rat. *The European journal of neuroscience*  
1045 12: 4562-6
- 1046 Wang LY, Kaczmarek LK. 1998. High-frequency firing helps replenish the readily releasable  
1047 pool of synaptic vesicles. *Nature* 394: 384-8
- 1048 Witelski T, Bowen M. 2015. *Fast/slow Dynamical Systems. In: Methods of Mathematical*  
1049 *Modelling.* pp. 201-213. Springer, Cham.
- 1050 Yvert B, Branchereau P, Meyrand P. 2004. Multiple spontaneous rhythmic activity patterns  
1051 generated by the embryonic mouse spinal cord occur within a specific developmental  
1052 time window. *Journal of neurophysiology* 91: 2101-9
- 1053

1054 **Figure captions**

1055 **Figure 1. Delayed Rectifier and A-Type potassium currents are present in embryonic**  
1056 **V1<sup>R</sup> at E12.5**

1057 (A) Representative traces of voltage responses showing single-spiking activity (left trace),  
1058 repetitive action potential firing (middle trace) and plateau potential activity (right trace). (B1,  
1059 B2 and B3) Representative examples of the total outward K<sup>+</sup> currents obtained from  $V_H = -$   
1060 100 mV (left traces), of  $I_{Kdr}$  ( $V_H = -30$  mV, middle traces) and of isolated  $I_A$  (left traces)  
1061 recorded at E12.5 in SS V1<sup>R</sup> (A1), RS V1<sup>R</sup> (A2) and PP V1<sup>R</sup> (B3). Voltage-dependent  
1062 potassium currents were evoked in response to 10 mV membrane potential steps (200 ms)  
1063 from -100 or from -30 mV to +40 mV (10 s interval between pulses). V1<sup>R</sup> were voltage  
1064 clamped at  $V_H = -60$  mV. A prepulse of -40 mV (300 ms) was applied to activate both  $I_A$  and  
1065  $I_{Kdr}$ .  $I_{Kdr}$  was isolated by applying a prepulse of 30 mV (300 ms) to inactivate  $I_A$  (B1 insert).  
1066  $I_A$  was isolated by subtracting step-by-step the currents obtained using a prepulse of 30 mV  
1067 ( $V_H = -30$  mV) from the currents obtained using a prepulse of -40 mV ( $V_H = -100$  mV). (C1,  
1068 C2 and C3) Current-voltage relationship ( $I - V$  curves) of  $I_{Kdr}$  (filled circles) and of  $I_A$  (open  
1069 circles) recorded in SS V1<sup>R</sup> (C1), RS V1<sup>R</sup> (C2) and PP V1<sup>R</sup> (C3).  $I - V$  curves were obtained  
1070 from currents shown in A1, A2 and A3. Note that the  $I - V$  curves are similar between SS  
1071 V1<sup>R</sup>, RS V1<sup>R</sup>, PP V1<sup>R</sup>.

1072

1073 **Figure 2. Maximal  $G_{Kdr}$ ,  $G_{Nap}$  values and  $G_{Nap}/G_{Kdr}$  ratio in embryonic V1<sup>R</sup> recorded at**  
1074 **E12.5 and at E14.5**

1075 (A) Bar graph showing maximal  $G_{Kdr}$  value (Max  $G_{Kdr}$ ) in SS V1<sup>R</sup> at E12.5 (n = 9; gray bar)  
1076 and at E14.5 (n = 10; gray bar), and in RS V1<sup>R</sup> (n = 7; red bar), ME V1<sup>R</sup> (n = 3; purple bar)  
1077 and PP V1<sup>R</sup> at E12.5 (n = 7; blue bar).  $G_{Kdr}$  was calculated from  $I_{Kdr}$  at  $V_H = +20$  mV,  
1078 assuming a K<sup>+</sup> equilibrium potential of -96 mV. There is no significant difference

1079 in  $G_{Kdr}$  between SS V1<sup>R</sup> and RS V1<sup>R</sup>, while  $G_{Kdr}$  is significantly smaller in PP V1<sup>R</sup> as  
1080 compared to SS V1<sup>R</sup> and RS V1<sup>R</sup>.  $G_{Kdr}$  was significantly higher in SS V1<sup>R</sup> at E14.5 than in SS  
1081 V1<sup>R</sup>, RS V1<sup>R</sup> and PP V1<sup>R</sup> at E12.5. (Kruskall-Wallis test  $P < 0.0001$ ; SS V1<sup>R</sup> versus RS V1<sup>R</sup>  
1082 at E12.5,  $P = 0.5864$ ; SS V1<sup>R</sup> versus PP V1<sup>R</sup> at E12.5,  $P = 0.0243$ ; RS V1<sup>R</sup> versus PP V1<sup>R</sup> at  
1083 E12.5,  $P = 0.0086$ ; E14.5 SS V1<sup>R</sup> versus E12.5 SS V1<sup>R</sup>,  $P = 0.0048$ ; E14.5 SS V1<sup>R</sup> versus  
1084 E12.5 RS V1<sup>R</sup>,  $P = 0.0384$ , E14.5 SS V1<sup>R</sup> versus E12.5 PP V1<sup>R</sup>,  $P < 0.0001$ ). The increase in  
1085  $G_{Kdr}$  between E12.5 and E14.5 is likely to be due to the increase in neuronal size (input  
1086 capacitance; Figure 2A). Indeed there was no significant difference (Mann Whitney test,  $P =$   
1087 0.133) in  $G_{Kdr}$  density between SS V1<sup>R</sup> at E12.5 ( $408.5 \pm 42.95$  pS/pF,  $n = 9$ ) and at E14.5  
1088 ( $522.6 \pm 49.6$  pS/pF,  $n = 10$ ). (B) Bar graph showing the maximal  $G_{Nap}$  value (Max  $G_{Nap}$ ) in  
1089 SS V1<sup>R</sup> at E12.5 ( $n = 9$ ; gray bar) and E14.5 ( $n = 10$ ; green bar), and in RS V1<sup>R</sup> ( $n = 8$ ; red bar),  
1090 ME V1<sup>R</sup> ( $n = 3$ ; purple bar) and PP V1<sup>R</sup> ( $n = 6$ ; blue bar) at E12.5. Max  $G_{Nap}$  was calculated  
1091 from maximal  $I_{Nap}$  value measured on current evoked by assuming a Na<sup>+</sup> equilibrium  
1092 potential of +60 mV. There was no difference in  $G_{Nap}$  between RS V1<sup>R</sup> and PP V1<sup>R</sup>. On the  
1093 contrary,  $G_{Nap}$  measured in SS V1<sup>R</sup> at E12.5 or at E14.5 was significantly smaller as  
1094 compared to  $G_{Nap}$  measured at E12.5 in RS V1<sup>R</sup> or in PP V1<sup>R</sup>.  $G_{Nap}$  measured at E12.5 and  
1095 E14.5 in SS V1<sup>R</sup> were not significantly different (Kruskall-Wallis test  $P < 0.0001$ ; E12.5 SS  
1096 V1<sup>R</sup> versus E12.5 RS V1<sup>R</sup>,  $P = 0.0034$ ; E12.5 SS V1<sup>R</sup> versus E12.5 PP V1<sup>R</sup>,  $P = 0.0006$ ;  
1097 E12.5 RS V1<sup>R</sup> versus E12.5 PP V1<sup>R</sup>,  $P = 0.5494$ ; E14.5 SS V1<sup>R</sup> versus E12.5 SS V1<sup>R</sup>,  $P =$   
1098 0.5896; E14.5 SS V1<sup>R</sup> versus E12.5 RS V1<sup>R</sup>,  $P = 0.0005$ ; E14.5 SS V1<sup>R</sup> versus E12.5 PP V1<sup>R</sup>,  
1099  $P < 0.0001$ ). (C) Histograms showing the  $G_{Nap} / G_{Kdr}$  ratio in SS V1<sup>R</sup> at E12.5 ( $n = 9$ ; gray  
1100 bar) and E14.5 ( $n = 10$ ; green bar) and in RS V1<sup>R</sup> ( $n = 8$ ; red bar), ME V1<sup>R</sup> ( $n = 3$ ; purple bar)  
1101 and PP V1<sup>R</sup> ( $n = 6$ ; blue bar) at E12.5. Note that the  $G_{Nap} / G_{Kdr}$  ratio differs significantly  
1102 between SS V1<sup>R</sup>, RS V1<sup>R</sup> and PP V1<sup>R</sup> at E12.5, while it is not different between SS V1<sup>R</sup>  
1103 recorded at E12.5 and at E14.5 (Kruskall-Wallis test  $P < 0.0001$ ; SS V1<sup>R</sup> versus RS V1<sup>R</sup> at

1104 E12.5,  $P = 0.0367$ ; SS  $V1^R$  versus PP  $V1^R$  at E12.5,  $P < 0.0001$ ; RS  $V1^R$  versus PP  $V1^R$  at  
1105 E12.5,  $P = 0.0159$ ; E14.5 SS  $V1^R$  versus E12.5 SS  $V1^R$ ,  $P = 0.2319$ ; E14.5 SS  $V1^R$  versus  
1106 E12.5 RS  $V1^R$ ,  $P = 0.0017$ ; E14.5 SS  $V1^R$  versus E12.5 PP  $V1^R$   $P < 0.0001$ ). Data shown in A  
1107 and B were used to calculate  $G_{Nap} / G_{Kdr}$  ratio shown in C. ( $*P < 0.05$ ,  $**P < 0.01$ ,  $***P <$   
1108  $0.001$ ).

1109

1110 **Figure 3. Delayed Rectifier potassium current was inhibited by low concentrations of 4-**  
1111 **aminopyridine in embryonic  $V1^R$  recorded at E12.5**

1112 Example of voltage-dependent potassium currents evoked in response to 10 mV membrane  
1113 potential steps (200 ms) from -100 mV or from -30 mV to +40 mV (10 s interval between  
1114 pulses).  $V1^R$  were voltage clamped at  $V_H = -60$  mV. A prepulse of -40 mV (300 ms) was  
1115 applied to activate both  $I_A$  and  $I_{Kdr}$ .  $I_{Kdr}$  was evoked in response to 10 mV membrane  
1116 potential steps (200 ms) from -100 mV to +40 mV.  $V1^R$  were voltage clamped at  $V_H = -60$   
1117 mV. A prepulse of 30 mV ( $V_H = -30$  mV) was applied to isolate  $I_{Kdr}$ . (A1) Representative  
1118 example of the effect of 300  $\mu$ M 4-AP application on  $I_{Kdr}$  recorded from embryonic  $V1^R$  at  
1119 E12.5. (A2) Curves showing current-voltage relationships of  $I_{Kdr}$  in control and in the  
1120 presence of 300  $\mu$ M 4-AP. Measurements were performed on traces shown in A1. (B) Dose-  
1121 response relationship of 4-AP-evoked  $I_{Kdr}$  inhibition (mean + SE). Data were normalized to  
1122  $I_{Kdr}$  amplitude measured in the absence of 4-AP ( $V_H = 40$ mV) and fitted as explained in  
1123 Materials and Methods. Note that 4-AP  $IC_{50}$  is in  $\mu$ M range (2.9  $\mu$ M). 0.3  $\mu$ M 4-AP n = 3, 1  
1124  $\mu$ M 4-AP n = 3, 3  $\mu$ M 4-AP n = 9, 10  $\mu$ M 4-AP n = 13, 30  $\mu$ M 4-AP n = 7, 100  $\mu$ M 4-AP n =  
1125 7, 300  $\mu$ M 4-AP n = 7.

1126 **Figure 4. Increasing 4-AP concentration changed the firing pattern of single spiking**  
1127 **embryonic  $V1^R$  recorded at E12.5**

1128 The firing pattern of embryonic  $V1^R$  was evoked by 2 s suprathreshold depolarizing current  
1129 steps. (A1-A2) Representative traces showing examples of the effect of increasing  
1130 concentration of 4-AP (from 3 to 300  $\mu\text{M}$ ) on the firing pattern of a SS  $V1^R$  recorded at E12.5.  
1131 Note that in this case increasing 4-AP concentration converted single spiking (black trace) to  
1132 repetitive spiking (red trace), repetitive spiking to a mixed event pattern (purple trace) and  
1133 mixed events to plateau potential (blue trace). (A2) Example of SS  $V1^R$  in which increasing 4-  
1134 AP concentration converted single spiking to repetitive spiking only. (A3) Bar plots showing  
1135 the change in the firing pattern of SS  $V1^R$  according to 4-AP concentrations (control  $n = 10$ , 3  
1136  $\mu\text{M}$  4-AP  $n = 8$ , 10  $\mu\text{M}$  4-AP  $n = 10$ , 30  $\mu\text{M}$  4-AP  $n = 10$ , 100  $\mu\text{M}$  4-AP  $n = 10$ , 300  $\mu\text{M}$  4-AP  
1137  $n = 8$ ). (B) Representative traces showing the effect of 0.5  $\mu\text{M}$  TTX on a plateau potential  
1138 evoked in a SS  $V1^R$  in the presence of 300  $\mu\text{M}$  4-AP. (C) Representative traces showing the  
1139 effect of 0.5  $\mu\text{M}$  TTX on repetitive AP firing evoked in a SS  $V1^R$  in the presence of 300  $\mu\text{M}$   
1140 4-AP. In both cases, the application of TTX fully blocked the responses evoked in the  
1141 presence of 4-AP, indicating that they were underlain by the activation of voltage-gated  $\text{Na}^+$   
1142 channels.

1143

1144 **Figure 5. Cluster analysis of embryonic  $V1^R$  firing pattern in the embryonic spinal cord**  
1145 **at E12.5**

1146 (A, inserts) Cluster analysis of embryonic  $V1^R$  firing pattern was performed using three  
1147 parameters that describe the firing pattern during a 2 s suprathreshold depolarizing pulses: the  
1148 mean of the half-amplitude event duration (mean  $\frac{1}{2}\text{Ad}$ ), the coefficient of variation of  $\frac{1}{2}\text{Ad}$   
1149 ( $\text{CV } \frac{1}{2}\text{Ad}$ ) allowing to quantify the AP variation within a train (CV was set to 0 when the  
1150 number of spikes evoked by a depolarizing pulse was  $\leq 3$ ) and the duration ratio  $\text{ddr} = \Sigma \frac{1}{2}\text{Ad}$   
1151  $\text{Ad}/\text{Pw}$ , obtained by dividing the sum of  $\frac{1}{2}\text{Ad}$  by the pulse duration  $\text{Pw}$ , that indicates the  
1152 total time spent in the depolarized state. For example,  $\text{ddr} = 1$  when a plateau potential lasts as



1153 long as the depolarizing pulse. Conversely, its value is low when the depolarizing pulse  
1154 evokes a single AP only. A. Dendrogram for complete linkage hierarchical clustering of 163  
1155 embryonic V1<sup>R</sup> according to the values of log mean  $\frac{1}{2}Ad$ , of CV  $\frac{1}{2}Ad$  and of log ddr. The  
1156 colored matrix below the dendrogram shows the variations of these three parameters for all  
1157 the cells in the clusters (colored trees) extracted from the dendrogram. (B) The number of  
1158 clusters was determined by analyzing the distribution of silhouette width values (see Material  
1159 and Methods). The boxplots show the distribution of silhouette width values when the number  
1160 of clusters  $k$  varies from 2 to 12. The mean silhouette width values (red diamond shaped  
1161 points) attained their maximum when the estimated cluster number was 5. (C) 3D plot  
1162 showing cluster distribution of embryonic V1<sup>R</sup> according to log mean  $\frac{1}{2}Ad$ , CV  $\frac{1}{2}Ad$  and log  
1163 ddr. Each cluster corresponds to a particular firing pattern as illustrated in D: V1<sup>R</sup> that cannot  
1164 sustain repetitive firing of APs (1 to 3 AP/pulse only, gray), V1<sup>R</sup> that can fire tonically (red),  
1165 V1<sup>R</sup> with a firing pattern characterized by a mix of APs and relatively short plateau potentials  
1166 (dark purple), V1<sup>R</sup> with a firing pattern characterized by a mix of APs and relatively long  
1167 plateau potentials (light purple) and V1<sup>R</sup> with evoked plateau potentials only (blue). The  
1168 arrow in D indicates 3 misclassified V1<sup>R</sup> that could not sustain repetitive firing although they  
1169 were assigned to the cluster of repetitively firing V1<sup>R</sup> (see text).

1170

1171 **Figure 6. Changes in the input capacitance, the input resistance and the threshold values**  
1172 **of embryonic V1<sup>R</sup> from E11.5 to E16.5**

1173 (A) Graph showing how the input capacitance  $C_{in}$  of V1<sup>R</sup> changes with embryonic age.  $C_{in}$   
1174 significantly increased between E12.5 or E13.5 and E14.5 (Kruskall-Wallis test  $P < 0.0001$ ;  
1175 E12.5 versus E11.5  $P = 0.258$ , E12.5 versus E13.5  $P = 0.904$ , E12.5 versus E14.5  $P < 0.0001$ ,  
1176 E12.5 versus E15.5  $P < 0.0001$ , E12.5 versus E16.5  $P < 0.0001$ , E13.5 versus E14.5  $P <$   
1177  $0.0001$ , E13.5 versus E15.5  $P < 0.0001$ , E13.5 versus E16.5  $P < 0.0001$ ; E11.5  $n = 31$ , E12.5

1178  $n = 267$ , E13.5  $n = 43$ , E14.5  $n = 61$ , E15.5  $n = 16$ , E16.5  $n = 30$ ). (B) Graph showing how the  
1179 input resistance  $R_{in}$  of  $V1^R$  changes with embryonic age.  $R_{in}$  significantly increased between  
1180 E12.5 or E14.5 and E15.5 (Kruskall-Wallis test  $P < 0.0001$ ; E12.5 versus E11.5  $P > 0.999$ ,  
1181 E12.5 versus E13.5  $P = 0.724$ , E12.5 versus E14.5  $P > 0.999$ , E12.5 versus E15.5  $P = 0.0004$ ,  
1182 E12.5 versus E16.5  $P = 0.0005$ , E14.5 versus E15.5  $P = 0.0019$ , E14.5 versus E16.5  $P <$   
1183  $0.0058$ ; E11.5  $n = 31$ , E12.5  $n = 261$ , E13.5  $n = 43$ , E14.5  $n = 60$ , E15.5  $n = 16$ , E16.5  $n = 30$ ).  
1184 (C) Graph showing how the threshold of regenerative events (APs and plateau potentials) of  
1185  $V1^R$  changes with embryonic age. The average threshold became significantly more  
1186 hyperpolarized after E12.5 (Kruskall-Wallis test  $P < 0.0001$ ; E12.5 versus E11.5  $P = 0.676$ ,  
1187 E12.5 versus E13.5  $P = 0.0039$ , E12.5 versus E14.5  $P < 0.0001$ , E12.5 versus E15.5  $P <$   
1188  $0.0001$ , E12.5 versus E16.5  $P < 0.0001$ , E13.5 versus E14.5  $P > 0.999$ , E13.5 versus E15.5  $P$   
1189  $= 0.1398$ , E13.5 versus E16.5  $P = 0.0013$ ; E14.5 versus E15.5  $P > 0.999$ , E14.5 versus E16.5  
1190  $P = 0.0634$ , E15.5 versus E16.5  $P > 0.999$ ; E11.5  $n = 20$ , E12.5  $n = 162$ , E13.5  $n = 31$ , E14.5  
1191  $n = 30$ , E15.5  $n = 16$ , E16.5  $n = 30$ ). Yellow and purple bars below the graphs indicate the  
1192 two important phases of the functional development of spinal cord networks. The first one is  
1193 characterized by synchronized neuronal activity (SNA) and the second one is characterized by  
1194 the emergence of a locomotor-like activity (see text). Note that changes in  $C_{in}$  and  
1195  $R_{in}$  occurred at the end of the first developmental phase. ( $*P < 0.05$ ,  $** P < 0.01$ ,  $*** P <$   
1196  $0.001$ ; control, E12.5).

1197

### 1198 **Figure 7. Developmental changes of embryonic $V1^R$ firing patterns from E11.5 to E16.5**

1199 The intrinsic activation properties were analyzed using 2 s suprathreshold depolarizing  
1200 current steps. (A-E) Representative traces of voltage responses showing SS  $V1^R$  (black), RS  
1201  $V1^R$  (red), ME  $V1^R$  (purple) and PP  $V1^R$  (blue) at E11.5 (A), E13.5 (B), E14.5 (C) E15.5 (D)  
1202 and E16.5 (E). (F) Bar graph showing how the proportions of the different firing patterns

1203 change from E11.5 to E16.5 (E11.5 n = 22, E12.5 n = 165, E13.5 n = 32, E14.5 n = 57, E15.5  
1204 n = 15, 16.5 n = 28). Yellow and purple bars below the graphs indicate the first and the  
1205 second phase of functional embryonic spinal cord networks. The proportions of the different  
1206 firing patterns significantly changed between E11.5 to E12.5 (Fisher's exact test,  $P = 0.0052$ )  
1207 with a significant increase in the proportion of RS V1<sup>R</sup> (Fisher's exact test,  $P = 0.0336$ ) and a  
1208 significant decrease in the proportion of ME V1<sup>R</sup> (Fisher's exact test,  $P = 0.01071$ ) at E12.5.  
1209 Only two firing patterns (SS and RS) were observed after E13.5 and most embryonic V1<sup>R</sup> lost  
1210 their ability to sustain tonic firing after E13.5. However, at E16.5 the proportion of RS V1<sup>R</sup>  
1211 significantly increased at the expense of SS V1<sup>R</sup> when compared to E14.5 (Fisher's exact test,  
1212  $P = 0.0112$ ), indicating that embryonic V1<sup>R</sup> began to recover the ability to sustain tonic firing  
1213 after E15.5.

1214

1215 **Figure 8. Activated caspase-3 is not observed in embryonic V1<sup>R</sup> at E14.5**

1216 Representative confocal image of the ventral part of an isolated lumbar spinal cord of E14.5  
1217 GAD67-eGFP mouse embryo showing immunostainings using antibodies against eGFP (A),  
1218 FoxD3 (B) and activated Caspase 3 (aCaspase 3, C). (D) Superimposition of the three  
1219 stainings shows that embryonic V1<sup>R</sup> (eGFP+ and FoxD3+) were not aCaspase 3  
1220 immunoreactive. (A1, B1, C1 and D1) Enlarged images from A, B and C showing that  
1221 aCaspase 3 staining is localized in areas where eGFP and Foxd3 stainings were absent. (A2,  
1222 B2, C2 and D2) Enlarged images from A, B and C showing that aCaspase 3 staining is absent  
1223 in the area where V1<sup>R</sup> (eGFP+ and FoxD3+) are located. aCaspase 3 staining that did not co-  
1224 localize with GAD67eGFP likely indicates MN developmental cell death (Rigato et al 2011).

1225

1226 **Figure 9. 600  $\mu$ M 4-AP changed the firing pattern of single spiking embryonic V1<sup>R</sup>**  
1227 **recorded at E14.5**

1228 The firing pattern of embryonic  $V1^R$  was evoked by 2 s suprathreshold depolarizing current  
1229 steps. (A1, A2) Representative traces showing the effect of 4-AP application (600  $\mu$ M) on the  
1230 firing pattern of single SS  $V1^R$  recorded at E14.5. Note that the applications of 600  $\mu$ M 4-AP  
1231 evoked either a plateau potential (A1) or repetitive AP firing (A2), both fully blocked by TTX.  
1232 (B) Bar plots showing the proportions of the different firing patterns observed in the presence  
1233 of 600  $\mu$ M 4-AP versus control recorded in SS  $V1^R$  at E14.5 (n = 14).

1234

### 1235 **Figure 10. Embryonic $V1^R$ firing patterns predicted by computational modeling**

1236 (A) Firing patterns of 27 recorded cells, in which both  $G_{Nap}$  and  $G_{Kdr}$  were measured. Gray:  
1237 SS, red: RS, blue: PP. The three purple points located at the boundary between the RS and PP  
1238 regions correspond to mixed events (ME) where plateau potentials alternate with spiking  
1239 episodes. Note that no cell exhibited low values of both  $G_{Nap}$  and  $G_{Kdr}$  (lower left), or large  
1240 values of both conductances (upper right). (B) Bifurcation diagram of the deterministic model  
1241 when  $G_{Kdr}$  is kept fixed to 2.5 nS or 10 nS while  $G_{Nap}$  is varied.  $G_{in} = 1$  nS and  $I = 20$  pA.  
1242 For  $G_{Kdr} = 10$  nS (i.e. in the top experimental range), the red curves indicate the maximal and  
1243 minimal voltages achieved on the stable limit cycle associated with repetitive firing (solid  
1244 lines) and on the unstable limit cycle (dashed lines). The fixed point of the model is indicated  
1245 by a gray solid line when it corresponds to the stable quiescent state, a gray dashed line when  
1246 it is unstable and a solid blue line when it corresponds to a stable plateau potential. The two  
1247 HB corresponding to the change of stability of the quiescence state (HB<sub>1</sub>,  $G_{Nap} = 0.95$  nS) and  
1248 of the voltage plateau (HB<sub>2</sub>,  $G_{Nap} = 3.04$  nS) are indicated, as well as the two SN bifurcations  
1249 of limit cycles associated with the onset (SN<sub>1</sub>,  $G_{Nap} = 0.58$  nS) and offset (SN<sub>2</sub>,  $G_{Nap} = 3.14$   
1250 nS) of repetitive spiking as  $G_{Nap}$  is increased. For  $G_{Kdr} = 2.5$  nS, the model does not display  
1251 repetitive firing; it possesses a unique fixed point, which is always stable (blue-gray curve).  
1252 The transition from quiescence to plateau is gradual with no intervening bifurcation.

1253 Representative voltage traces of the three different activity patterns are shown: single spiking  
1254 in response to a 2 s current pulse (gray,  $G_{Nap} = 0.1$  nS,  $G_{Kdr} = 10$  nS), repetitive spiking  
1255 (red,  $G_{Nap} = 1.5$  nS,  $G_{Kdr} = 10$  nS) and plateau potential (blue,  $G_{Nap} = 1.5$  nS,  $G_{Kdr} = 2.5$  nS).  
1256 Note that the plateau never outlasts the current pulse. (C) Bifurcation diagram when  $G_{Nap}$  is  
1257 kept fixed at 1.5 nS and  $G_{Kdr}$  is varied ( $I = 20$  pA). Same conventions as in B. Plateau  
1258 potential is stable until point HB<sub>2</sub> ( $G_{Kdr} = 5.05$  nS), repetitive firing can be observed between  
1259 HB<sub>2</sub> and SN<sub>1</sub> ( $G_{Kdr} = 21.05$  nS). The quiescent state is stable from point HB<sub>1</sub> ( $G_{Kdr} = 15.76$   
1260 nS) onward. Increasing  $G_{Nap}$  by merely 10% from 1.5 to 1.65 nS makes the bifurcation HB<sub>2</sub>  
1261 subcritical (not shown). This is because the RS-PP transition of the model occurs near a  
1262 Bautin bifurcation (a.k.a. generalized HB) bifurcation, where the supercritical HB, subcritical  
1263 HB and the SN bifurcation of limit cycles merge as shown in D (point B<sub>2</sub>). (D) Two-  
1264 parameters bifurcation diagram of the model in the  $G_{Nap} - G_{Kdr}$  plane ( $I = 20$  pA). The black  
1265 lines indicate the bifurcations HB<sub>1</sub> and HB<sub>2</sub>. The red lines indicate the SN bifurcations of  
1266 limit cycles SN<sub>1</sub> and SN<sub>2</sub>. The shaded area indicates the region where repetitive firing can  
1267 occur. The black squares B<sub>1</sub> and B<sub>2</sub> correspond to Bautin bifurcations where supercritical HB  
1268 (occurring between B<sub>1</sub> and B<sub>2</sub>), subcritical HB (occurring on the rest of the HB<sub>1</sub> and HB<sub>2</sub> lines)  
1269 and the SN bifurcations of limit cycles SN<sub>1</sub> and SN<sub>2</sub> coalesce. Because the model is near a  
1270 Bautin bifurcation, its behavior is little affected by the nature of the bifurcation HB<sub>2</sub>. When  
1271 HB<sub>2</sub> is subcritical, the bistability region between HB<sub>2</sub> and SN<sub>2</sub> is narrow (see Fig 9, B and D)  
1272 and action potentials keep a large amplitude until their disappearance at point HB<sub>2</sub> (see Fig  
1273 9B). When HB<sub>2</sub> is supercritical, the spike amplitude vanishes at HB<sub>2</sub> but the decay is very  
1274 steep (see Fig 9C). Taking into account channel noise further softens the distinction between  
1275 these two cases. The oblique lines correspond to three different values of the ratio  $G_{Nap}/G_{Kdr}$ :  
1276 0.03 (gray), 0.2 (red) and 0.5 (blue). Voltage traces on the right display the response to a 2 s  
1277 current pulse when channel noise is taken into account for the three regimes: quiescence (top,

1278 gray trace and dot in the diagram), repetitive firing (middle, red) and plateau potential (bottom,  
1279 blue). They correspond to the three deterministic voltage traces shown in B. Note that the  
1280 one-parameter bifurcation diagrams shown in B correspond to horizontal lines through points  
1281 1 and 2 ( $G_{Kdr} = 10$  nS) and through point 3 ( $G_{Kdr} = 2.5$  nS), respectively. The bifurcation  
1282 diagram in C corresponds to a vertical line through point 2 and 3 ( $G_{Nap} = 1.5$  nS). (E)  
1283 Cumulative distribution function of the ratio  $G_{Nap}/G_{Kdr}$  for the four clusters shown in A,  
1284 showing the sequencing SS (gray)  $\rightarrow$  RS (red)  $\rightarrow$  ME (purple, 3 cells only)  $\rightarrow$  PP (blue)  
1285 predicted by the two-parameters bifurcation diagram in D. The wide PP range, as compared to  
1286 SS and RS, merely comes from the fact that  $G_{Kdr}$  is small for cells in this cluster. (F) The data  
1287 points in A are superimposed on the two-parameters bifurcation diagram shown in D,  
1288 demonstrating that our basic model accounts well for SS, RS and PP clusters (indicated with  
1289 the same color code as in A). The bifurcation diagram is simplified compared to A, only the  
1290 region where repetitive spiking is possible (i.e. between the lines  $SN_1$  and  $SN_2$  in A) being  
1291 displayed (shaded area). Notice that 3 ME cells (purple dots) are located near the transition  
1292 between the RS and PP regions (indicated here by the purple fringe along the  $SN_2$  bifurcation  
1293 line). The four arrows indicate the presumable evolution of  $G_{Nap}$  and  $G_{Kdr}$  for SS, RS, ME  
1294 and PP cells between E12.5 and E14.5-15.5.  $G_{Nap}$  eventually decreases while  $G_{Kdr}$  keeps on  
1295 increasing. G. Distribution of a sample of cells in the  $G_{Kdr} - G_{Kdr}$  plane at E14.5. All the cells  
1296 are located well within the SS region far from bifurcation lines because of the decreased  $G_{Nap}$   
1297 compared to E12.5, the increased  $G_{Kdr}$ , and the shift of the RS region (shaded) due to  
1298 capacitance increase (18 versus 13 pF).

1299

1300 **Figure 11. Effects of the slow inactivation of  $I_{Nap}$  on firing patterns predicted by**  
1301 **computational modeling**

1302 (A) Examples of repetitive plateaus (left) and mixed events (right) recorded in  $V1^R$  at E12.5  
1303 during a 2 s current pulse. (B1) Current-voltage curve of the basic model (without slow  
1304 inactivation of  $I_{Nap}$ , and without  $I_A$  or channel noise) for  $G_{Kdr} = 2.5$  nS and for  $G_{Nap} = 1.7$  nS  
1305 (lower curve) and 2.5 nS (upper curve).  $G_{in} = 2.5$  nS. Solid lines denote stable fixed points  
1306 and dashed lines unstable ones. For  $G_{Nap} = 1.7$  nS, bistability between quiescence and plateau  
1307 occurs between the SN bifurcations  $SN_1$  ( $I = 2.1$  pA) and  $SN_2$  ( $I = 8.3$  pA). When  $G_{Nap}$  is  
1308 increased to 2.5 nS, that bistability region extends to the negative current range, which  
1309 implies that once a plateau has been elicited, the model will stay in that stable state and not  
1310 return to the resting state, even though current injection is switched off (see insert). B1 Insert.  
1311 Voltage response to a 2 s current pulse of 8 pA for  $G_{Nap} = 2.5$  nS. The resting state (gray dot  
1312 on the lower curve in B1) is destabilized at pulse onset and a plateau is elicited (blue dot on the  
1313 upper curve in B1). At pulse offset, the plateau is maintained, even though the injected current  
1314 is brought back to zero, and channel noise is not sufficient to go back to the resting state. (B2)  
1315 Domain of bistability between quiescence and plateau (shaded) in the  $I - G_{Nap}$  plane for  $G_{Kdr} =$   
1316 2.5 nS. It is delimited by the two lines  $SN_1$  and  $SN_2$  where SN bifurcations of fixed points  
1317 occur. Bistability requires that  $G_{Nap}$  exceeds 1.35 nS, and the domain of bistability enlarges as  
1318  $G_{Nap}$  is increased further. The two horizontal lines correspond to the two cases shown in  
1319 B1:  $G_{Nap} = 1.7$  nS and 2.5 nS. (C) Behavior of the model when slow inactivation is  
1320 incorporated (half-inactivation voltage  $V_s = -30$  mV, steepness  $k_s = -5$  mV). The bifurcation  
1321 diagram of the basic model (without slow inactivation) for  $I = 8$  pA (compared to 20 pA in  
1322 Fig 9) and  $G_{Kdr} = 2.5$  nS (same conventions as in Fig 9B) and the stable limit cycle (black  
1323 solid curve) obtained when slow inactivation is added (voltage-independent time constant: 1 s)  
1324 are superimposed. The limit cycle is comprised of four successive phases (see labels): 1) long  
1325 plateau during which  $I_{Nap}$  slowly inactivates, 2) fast transition to the quiescent state, 3)  
1326 repolarization episode during which  $I_{Nap}$  slowly deinactivates, 4) fast transition back to the

1327 plateau. Each plateau starts with a full blown action potential (or a series of rapidly decaying  
1328 spikelets). Note that the bifurcation HB is subcritical here (unstable limit cycle in red), at  
1329 variance with square wave bursting (supercritical bifurcation and stable limit cycle); this is a  
1330 characteristic feature of pseudo-plateau bursting. Voltage responses to a 2 s current pulse are  
1331 shown on the right for different kinetics of slow inactivation. Top: voltage-independent time  
1332 constant of 1 s, Middle: same with channel noise added to fast and slow gating variables,  
1333 Bottom: time constant increases with membrane voltage from 100 ms to 1 s (midpoint: -30  
1334 mV, steepness: 15 mV). (D) Mixed events. The bifurcation diagram of the basic model  
1335 for  $G_{K_{dr}} = 2.5$  nS and  $I = 10$  pA and the stable limit cycle obtained in the presence of slow  
1336 inactivation ( $G_{Nap} = 2.5$  nS,  $V_s = -20$  mV,  $k_s = -15$  mV, voltage-independent time constant: 1  
1337 s) are superimposed. Here again, the limit cycle is comprised of four successive phases (see  
1338 labels): 1) slow inactivation of  $I_{Nap}$  that leads to the crossing of the bifurcation point HB<sub>2</sub> and  
1339 the destabilization of the plateau potential, 2) fast transition to the spiking regime, 3)  
1340 repetitive spiking during which  $I_{Nap}$  slowly de-inactivates, which leads to the crossing of the  
1341 bifurcation point SN<sub>2</sub> and terminates the spiking episode, 4) fast transition back to the stable  
1342 plateau potential. Voltage traces for a constant injected current (10 pA) are shown on the right  
1343 and in the absence of any channel noise. Top: voltage-independent time constant of 1 s,  
1344 Bottom: time constant increases with membrane voltage from 200 to 800 ms (same  $V_s$  and  $k_s$   
1345 as in C). Note that in C and D the first plateau lasts longer than the following ones, as in  
1346 electrophysiological recordings of embryonic V1<sup>R</sup> cells displaying repetitive plateaus. This  
1347 form of adaptation is caused by the slow inactivation of the persistent sodium current.

1348

1349 **Figure 12. Effect of 4-AP application on evoked GABAergic GICs or GDPs recorded in**  
1350 **MNs at E12.5.**



1351 (A) Drawing showing the cervical position of the stimulation electrode and the lumbar  
1352 position of the recording electrode. (B1) Evoked Giant Inward Current (GIC) in the presence  
1353 of 4 mM kynurenic acid in control condition, in the presence of 30  $\mu$ M 4-AP and 300  $\mu$ M 4-  
1354 AP. (B2) Bar graph showing GIC amplitude (pA) and half-width (s) ( $*P < 0.05$ ). 4-AP  
1355 applied at concentrations of 30  $\mu$ M or 300  $\mu$ M significantly increased the amplitude  
1356 (Wilcoxon test,  $P = 0.016$  and  $P = 0.047$  respectively) and half-width (Wilcoxon test,  $P =$   
1357  $0.016$  and  $P = 0.018$  respectively) of GABAergic GIC. (C1) Evoked Giant Depolarizing  
1358 Potential (GDP) in the presence of 4 mM kynurenic acid in control condition, in the presence  
1359 of 30  $\mu$ M 4-AP and 300  $\mu$ M 4-AP. (C2) Bar graph showing GDPs amplitude (mV) and half-  
1360 width (s). 4-AP applied at concentrations of 30  $\mu$ M or 300  $\mu$ M significantly increased  
1361 GABAergic GDPs half-width (Wilcoxon test  $P = 0.004$  and  $P = 0.007$  respectively), but it did  
1362 not significant change the amplitude (Wilcoxon test  $P = 0.07$  and  $P = 0.07$  respectively).

1363

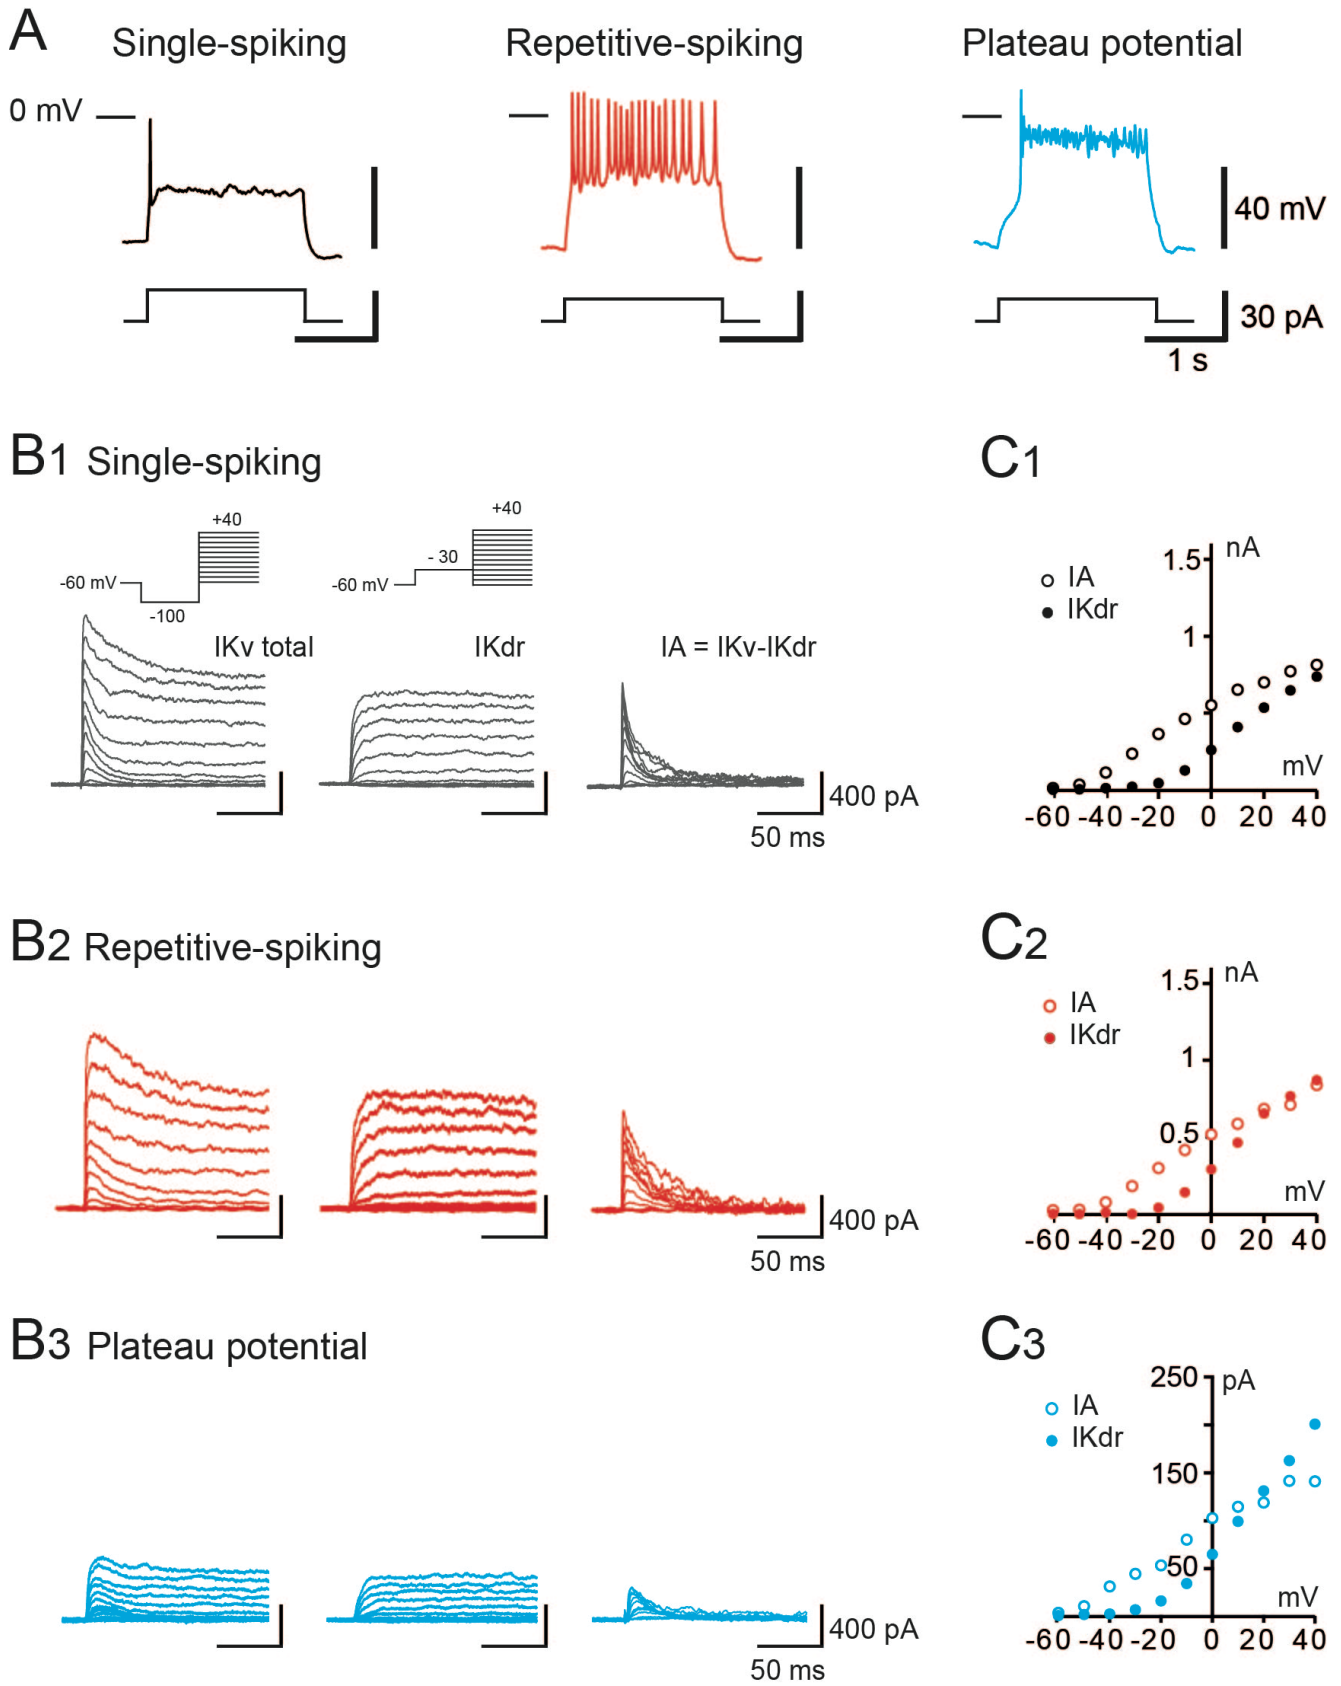

**Figure 1**

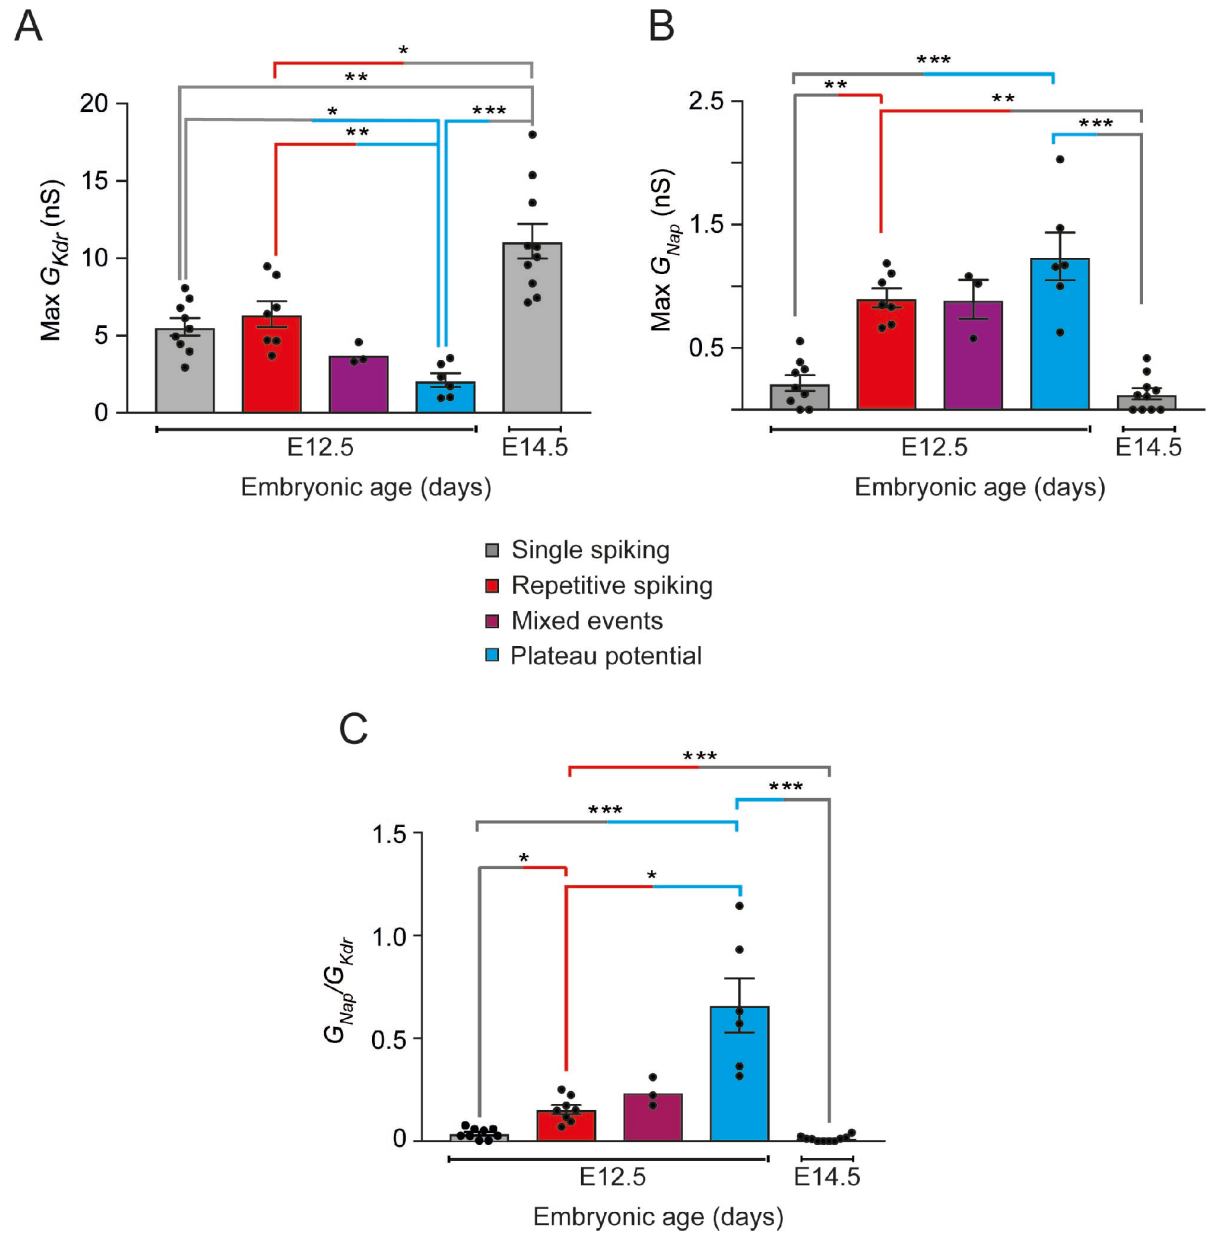

**Figure 2**

A1 E12.5

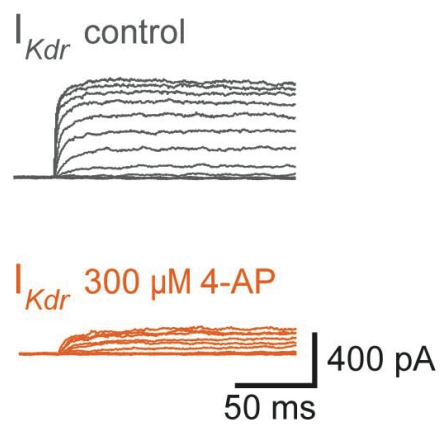

A2

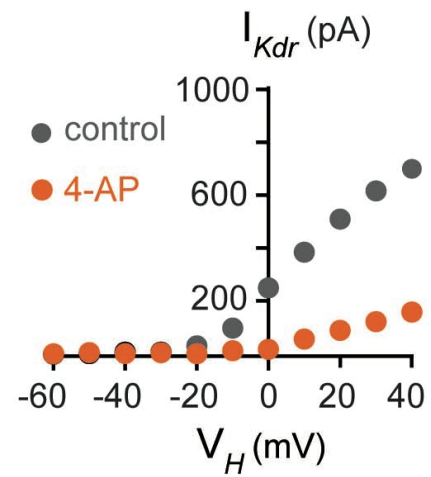

B

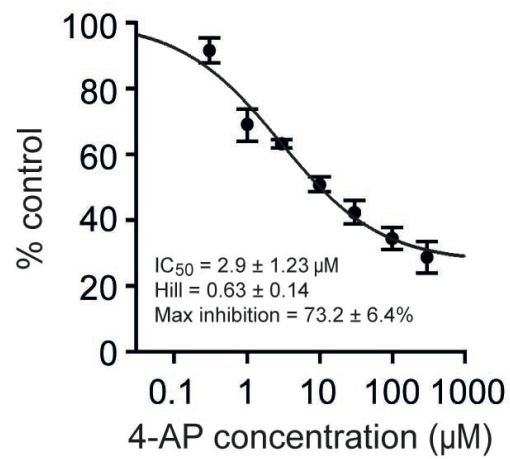

Figure 3

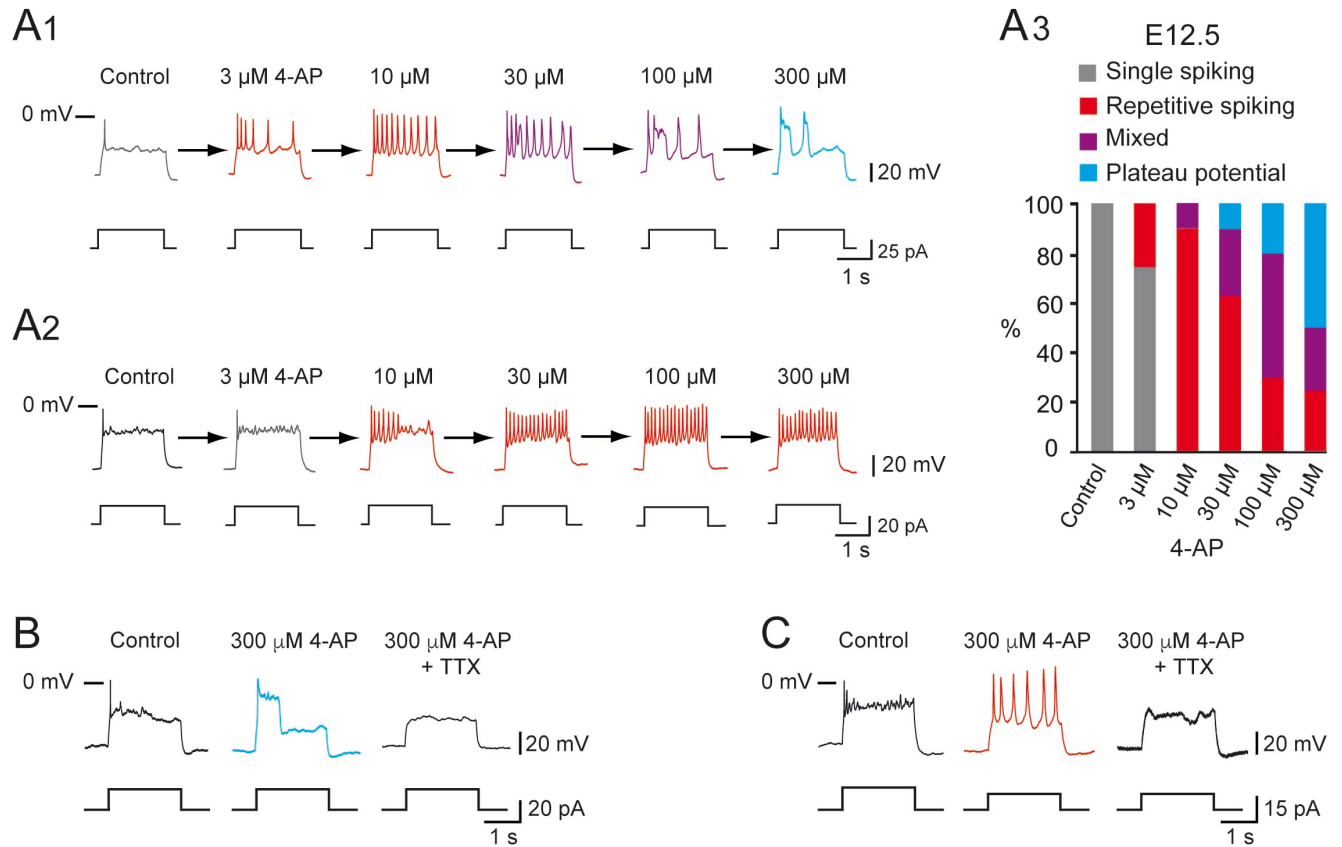

**Figure 4**

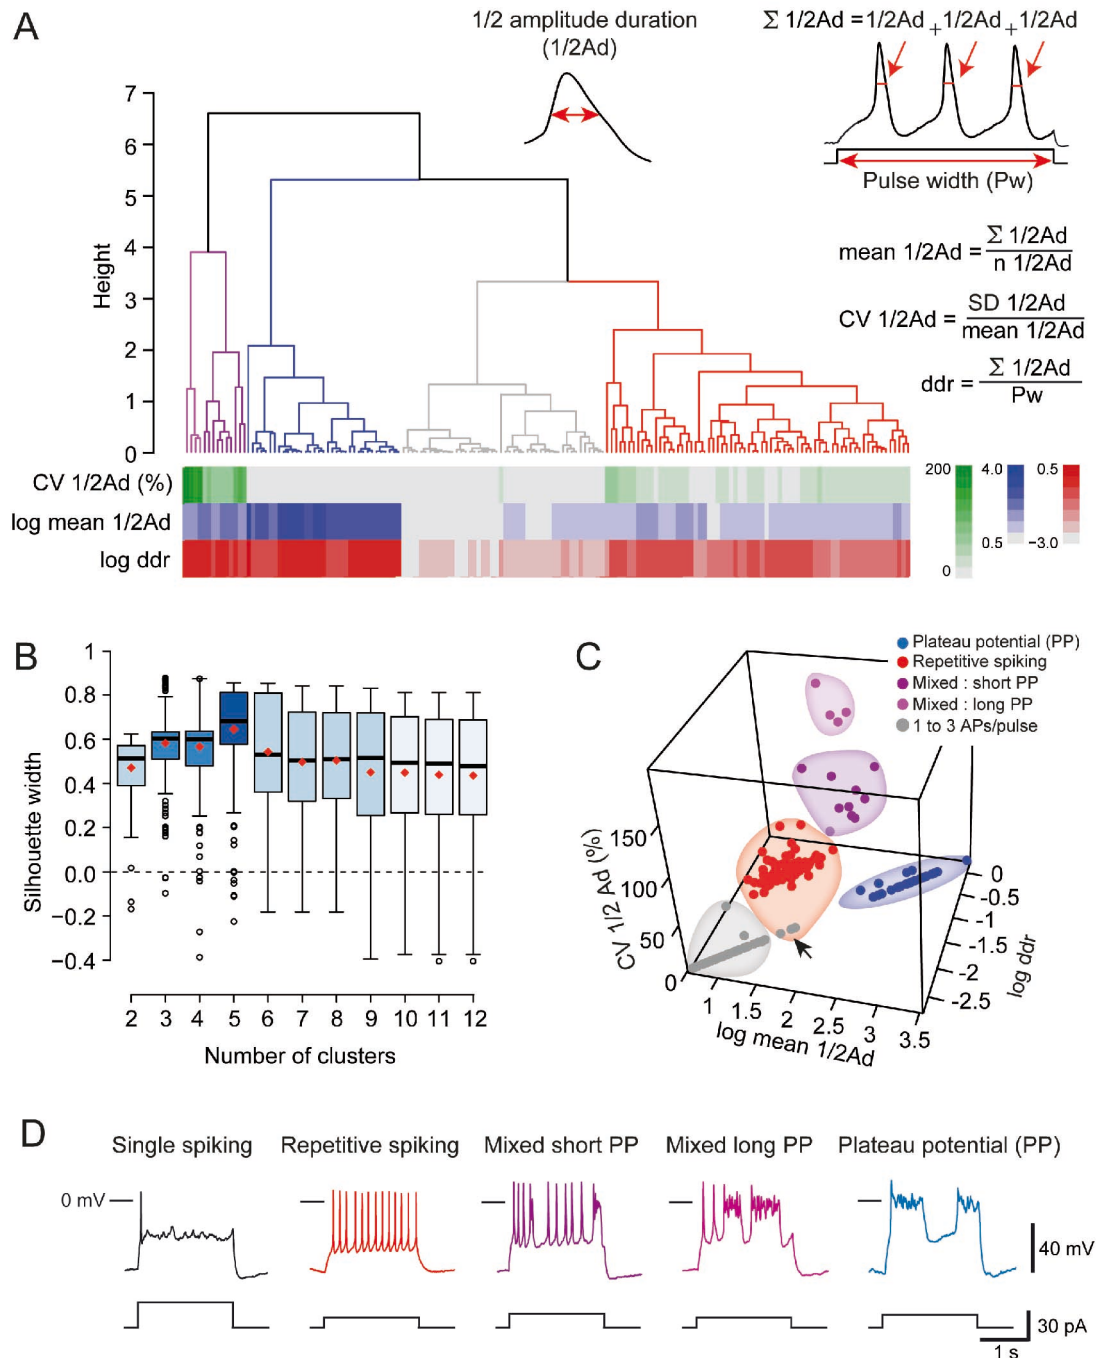

**Figure 5**

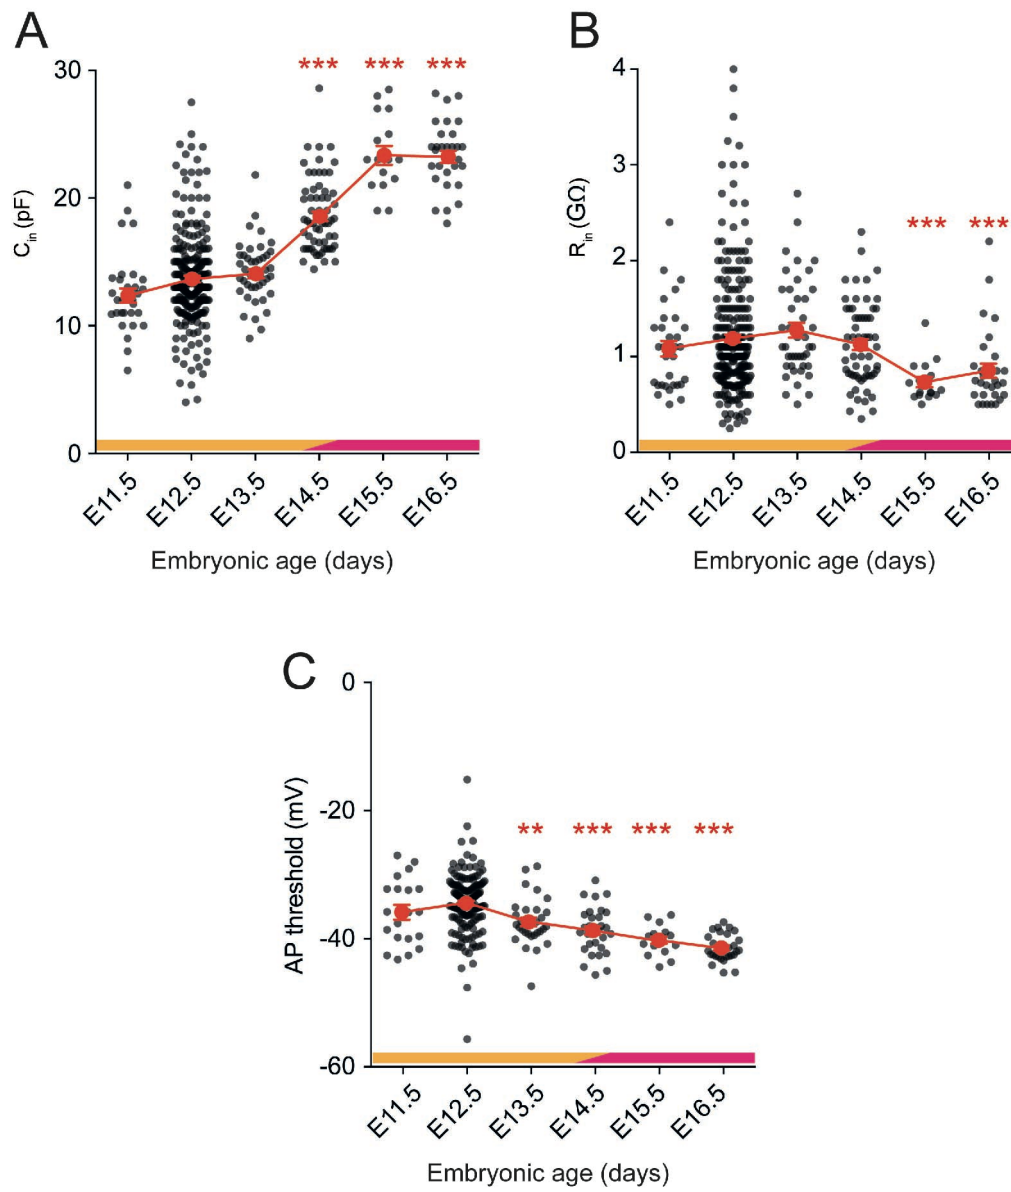

**Figure 6**

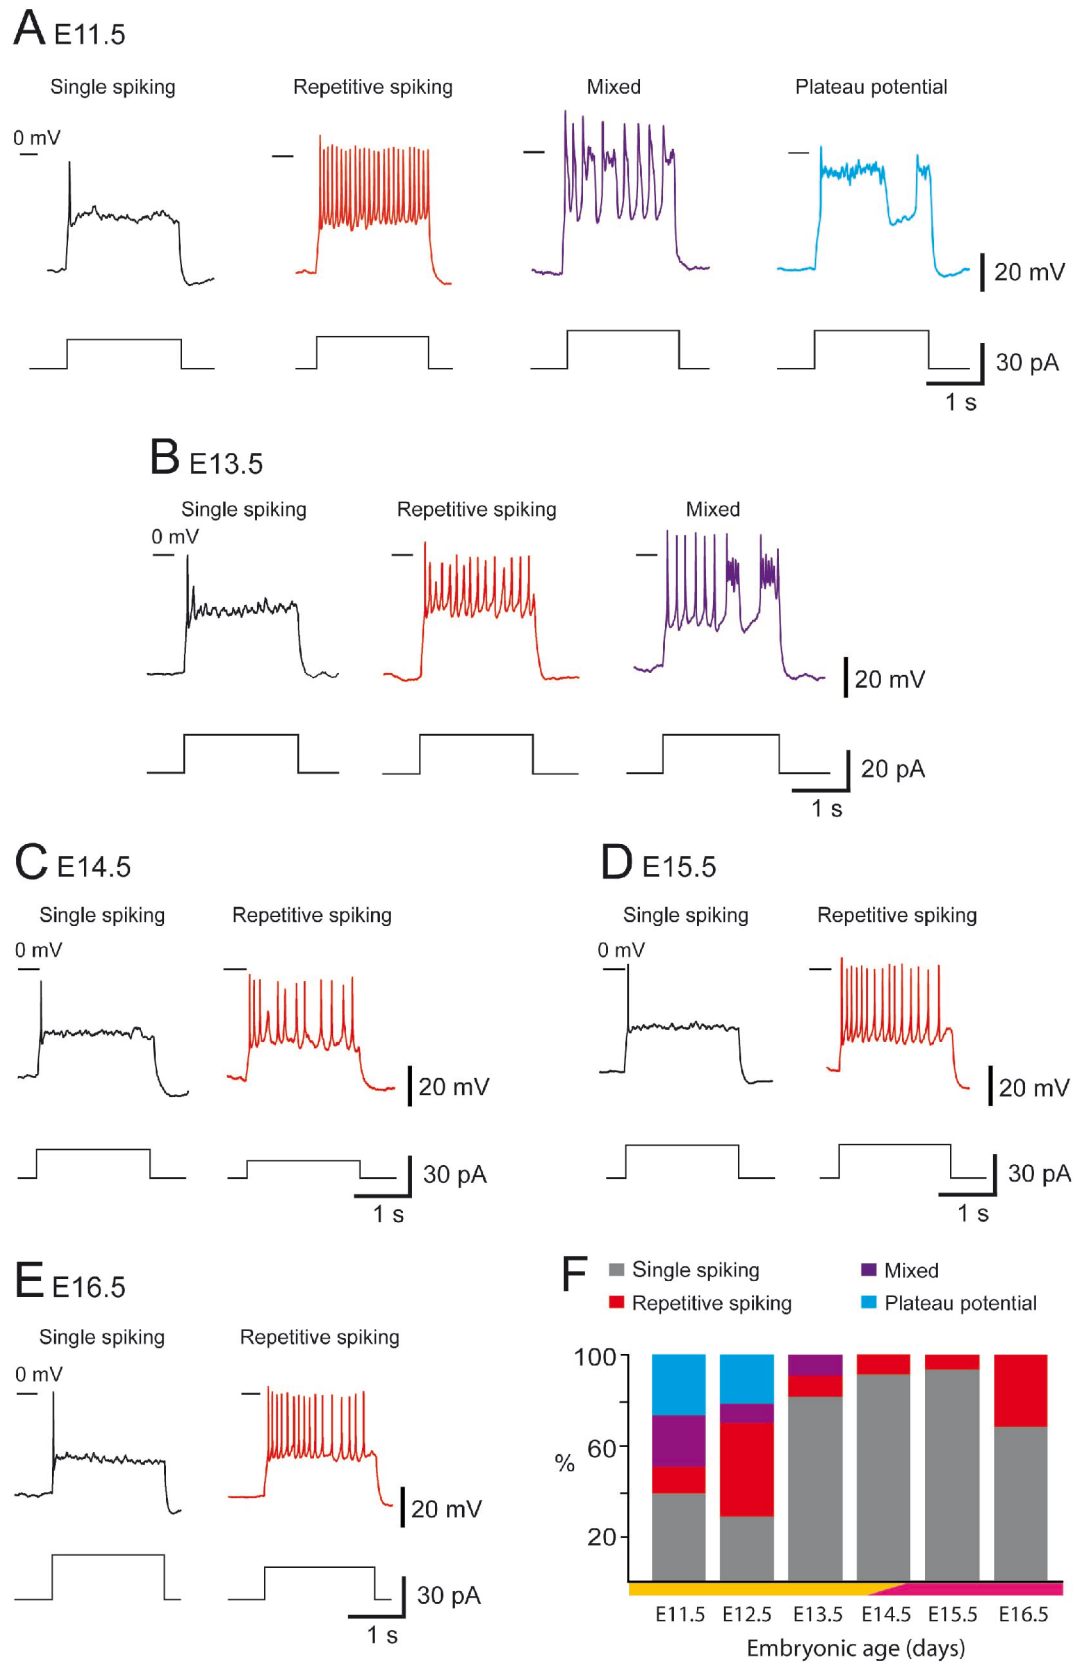

**Figure 7**



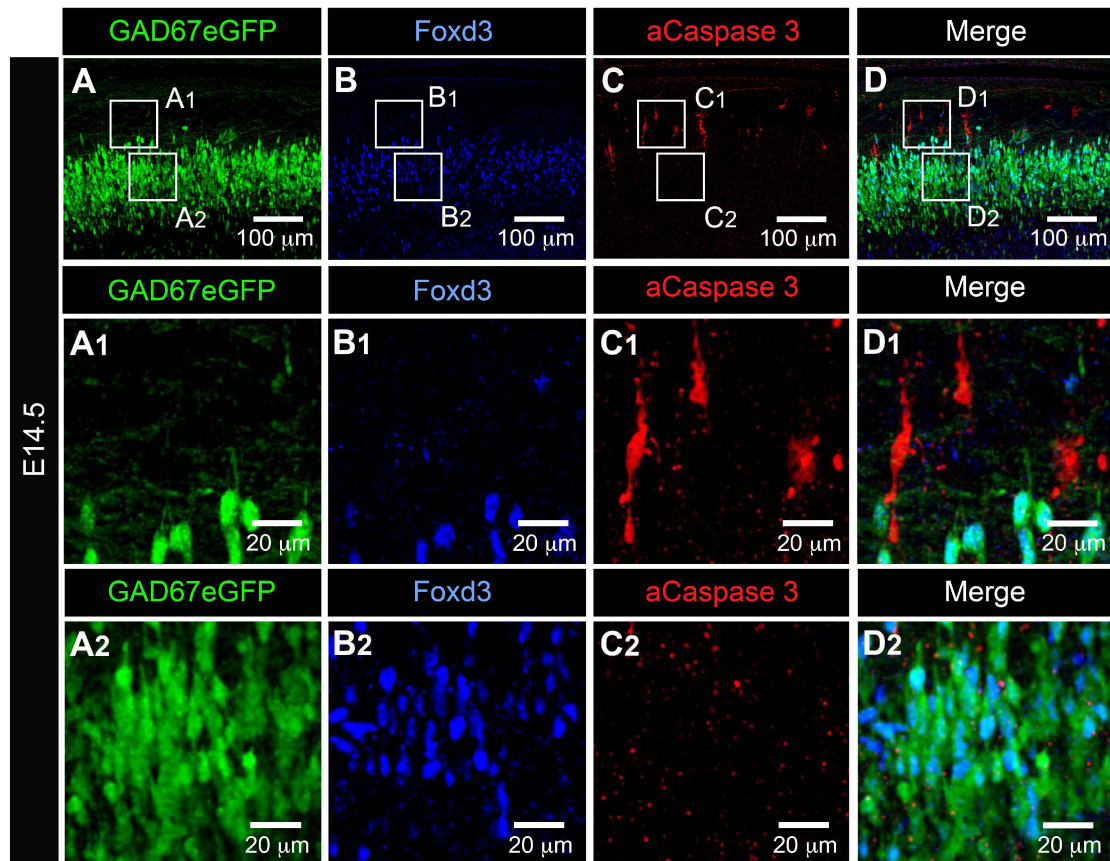

Figure 8

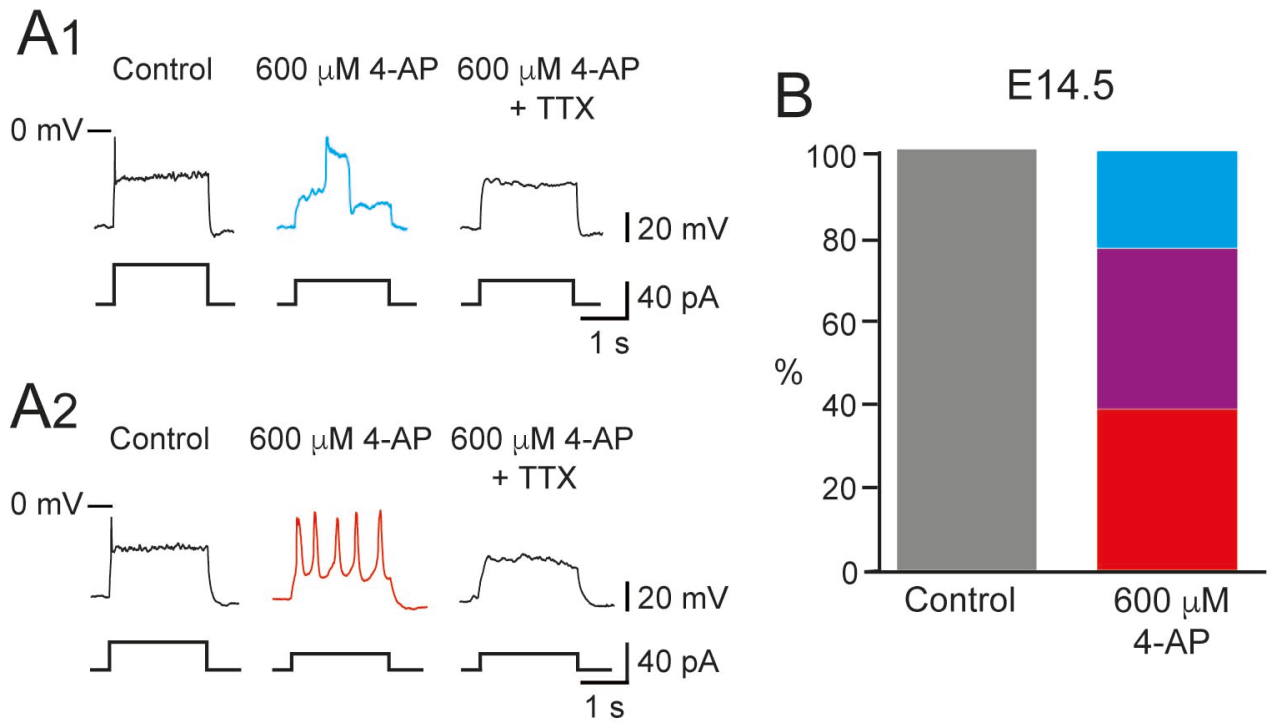

**Figure 9**

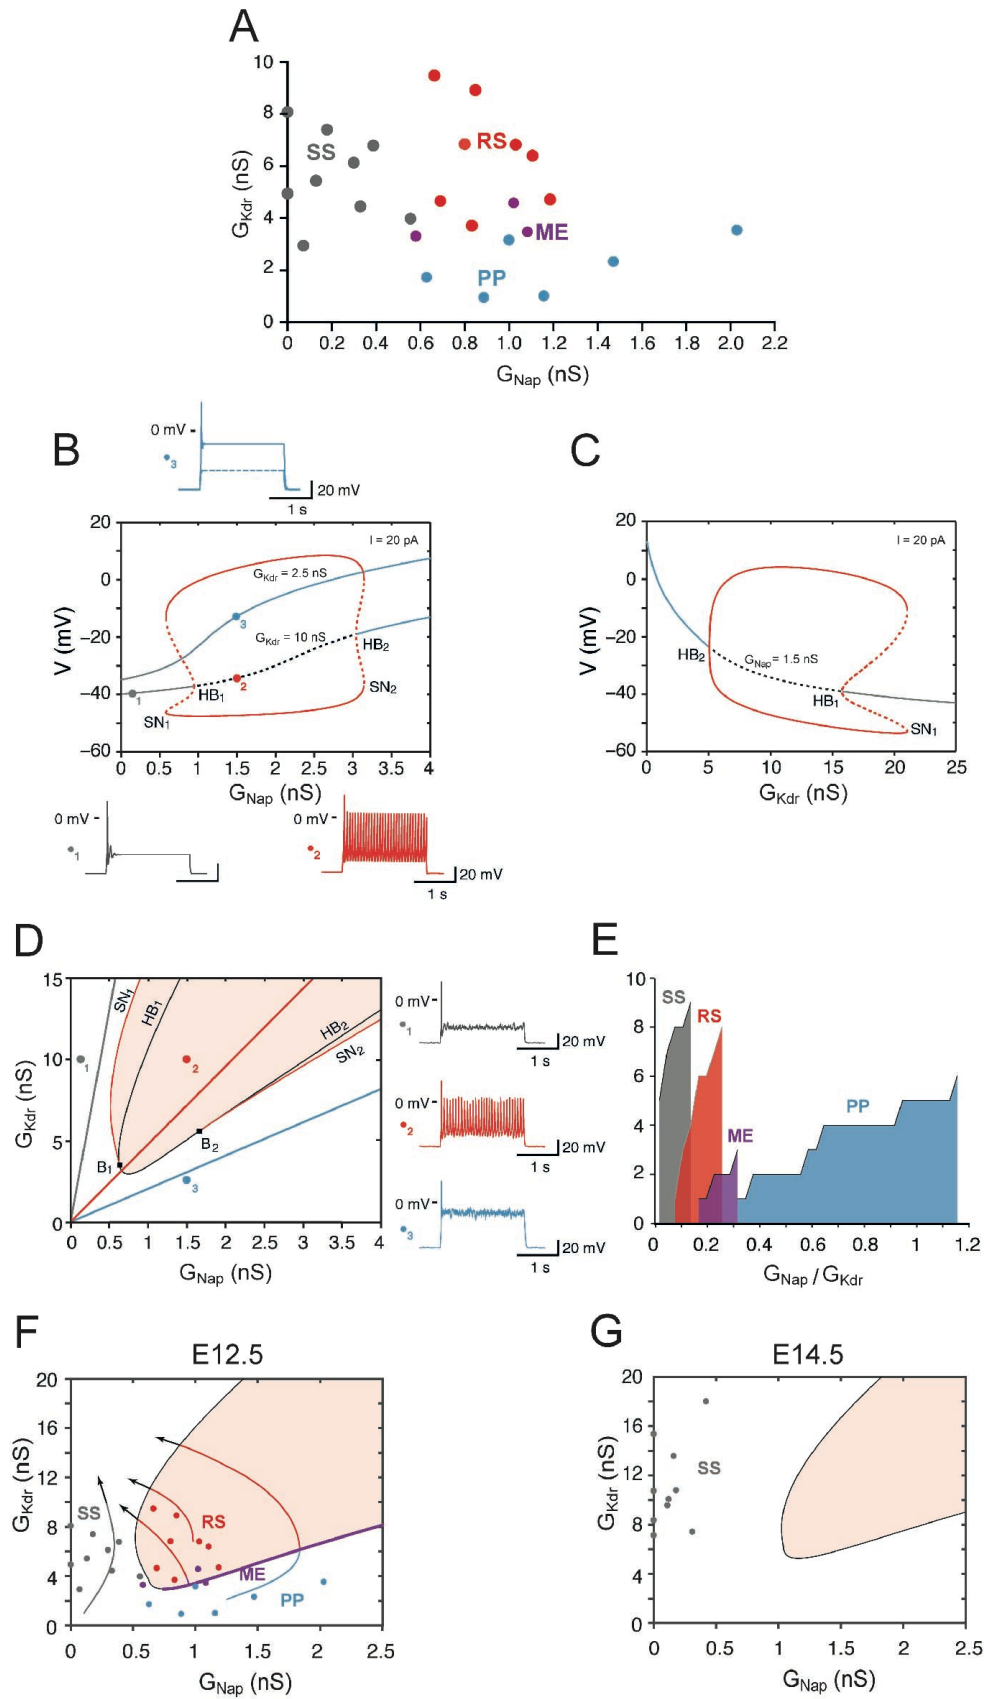

**Figure 10**

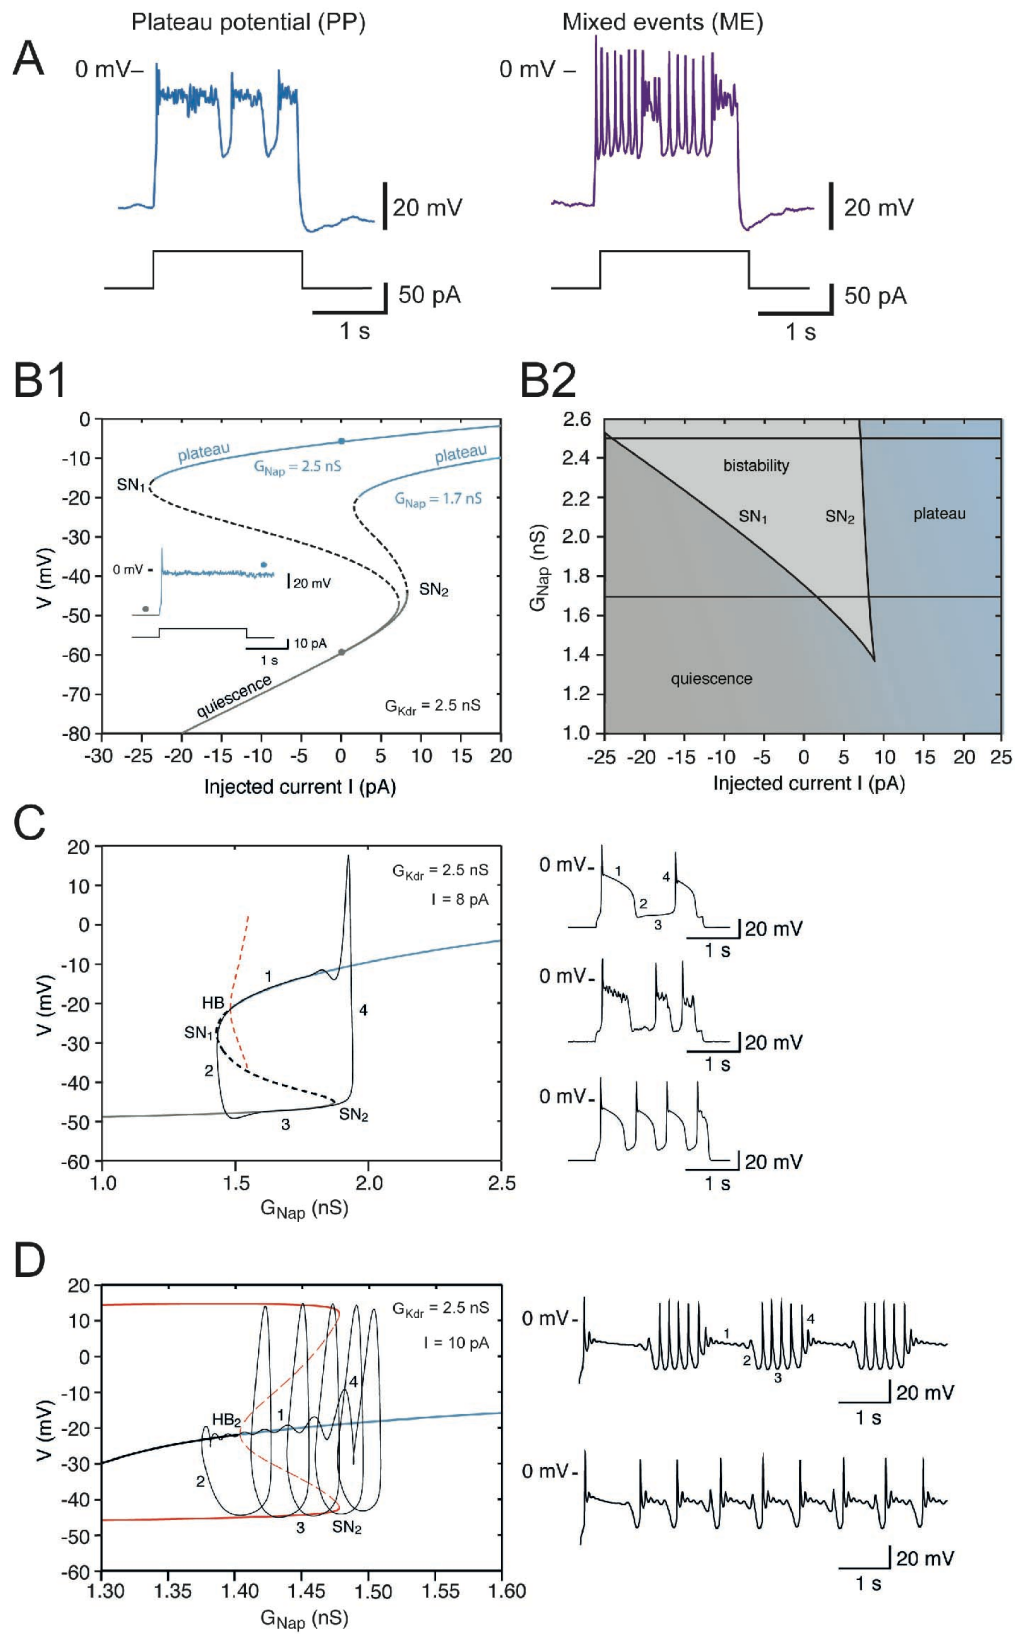

**Figure 11**

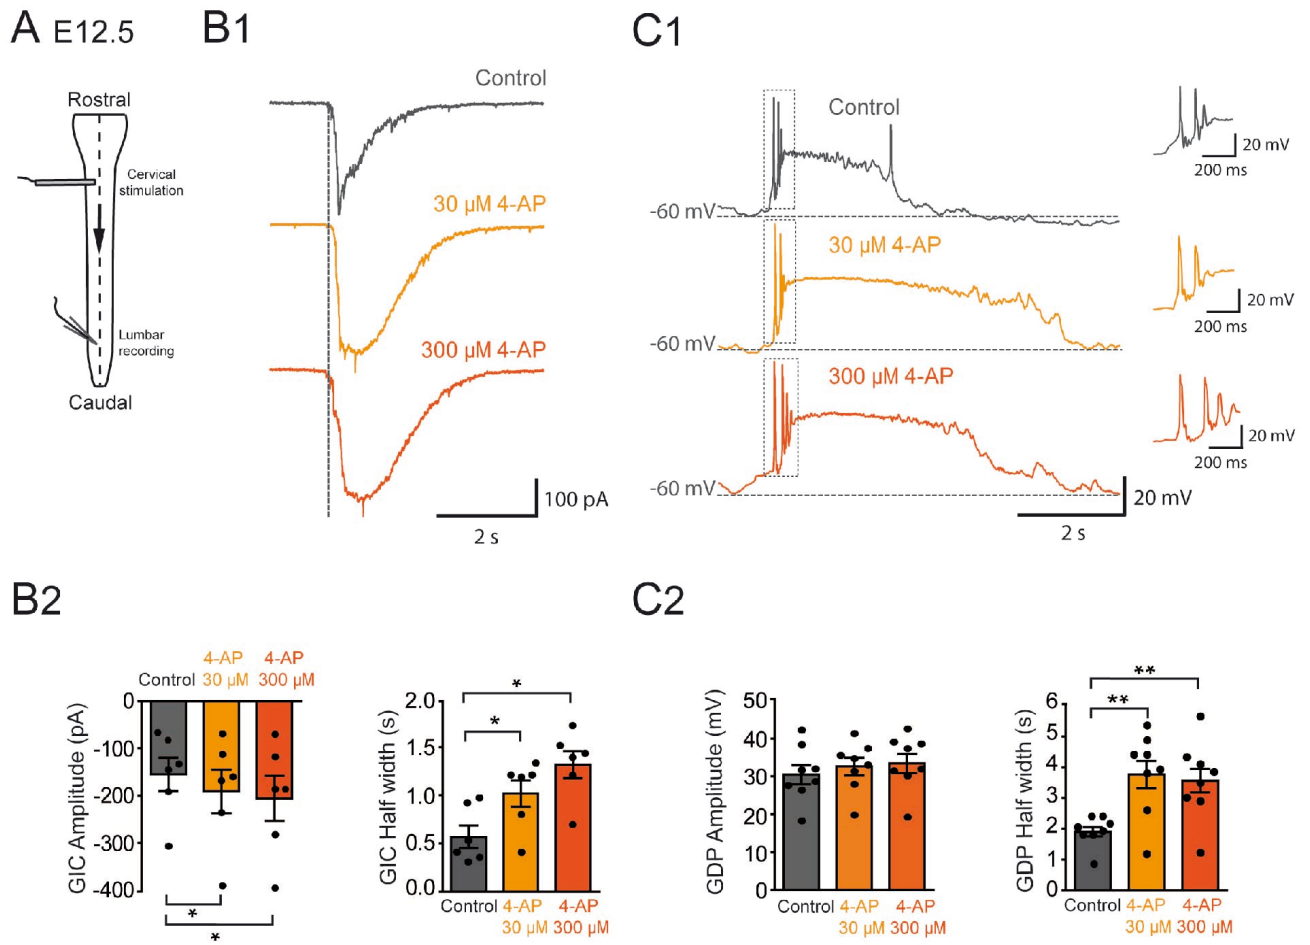

**Figure 12**

## SUPPLEMENTARY FIGURES

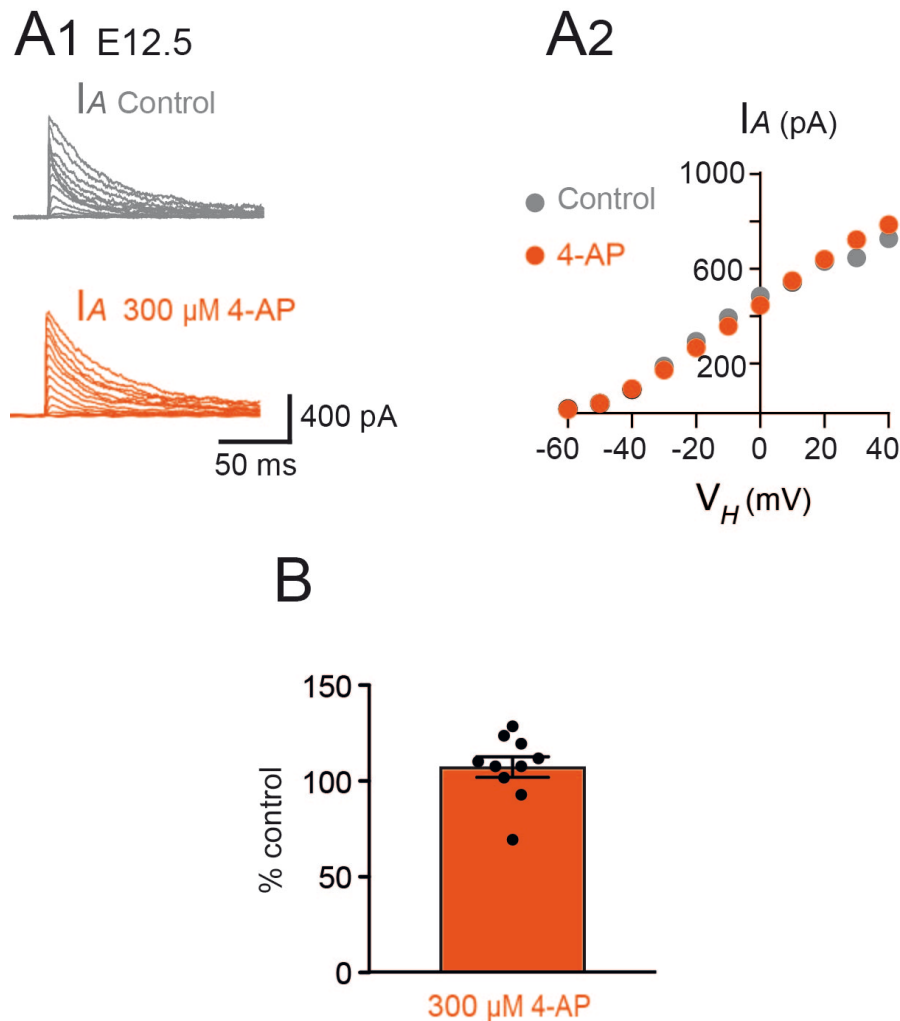

### Figure 3-Figure supplement 1. $I_A$ is insensitive to 4-AP in embryonic $V1^R$ .

$I_A$  was obtained as the difference between currents evoked from  $V_H = -100$  mV and currents evoked from  $V_H = -30$  mV (10 mV voltage step). (A1) Representative example of the effect of 300  $\mu$ M 4-AP on  $I_A$  in  $V1^R$  recorded at E12.5. (A2)  $I_A$  Current-voltage ( $I - V$ ) relationship in control conditions and in the presence of 300  $\mu$ M 4-AP. The  $I - V$  curves were obtained from the traces shown in A1. (B) Bar graph showing the percentage of  $I_A$  block elicited by 4-AP. Note that 4-AP did not significantly block  $I_A$  (Wilcoxon test  $P = 0.065$ ,  $n = 10$ ).

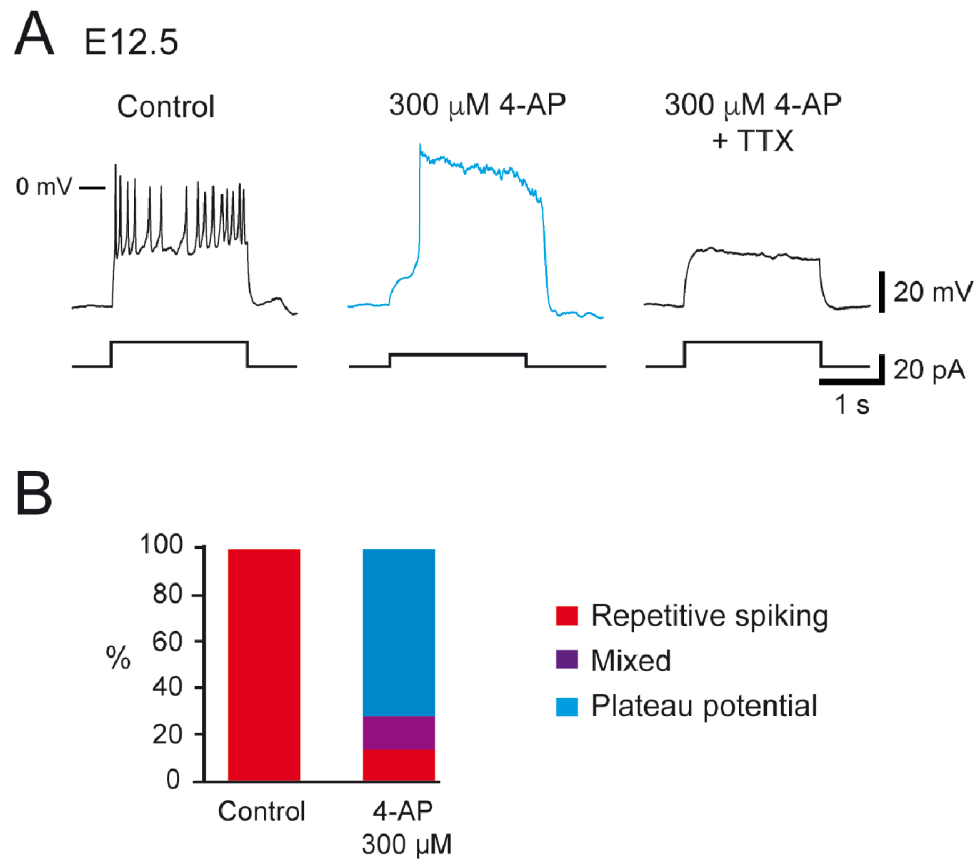

**Figure 4-Figure supplement 1. Effect of 4-AP application in repetitively spiking V1<sup>R</sup> at E12.5.**

(A) Representative traces showing the effect of 4-AP application (300  $\mu$ M) on RS V1<sup>R</sup> at E12.5. Note that plateau potential activity evoked in the presence of 4-AP (middle trace) was blocked by 0.5  $\mu$ M TTX (right trace). (B) Bar plots showing the changes in the firing pattern of RS V1<sup>R</sup> evoked by 300  $\mu$ M 4-AP application (n = 14). 4-AP application evoked a plateau potential in 71.4 % of the recorded neurons (10/14) and mixed events in 14.3% of the recorded neurons (2/14). The excitability pattern was not modified in 2 neurons.

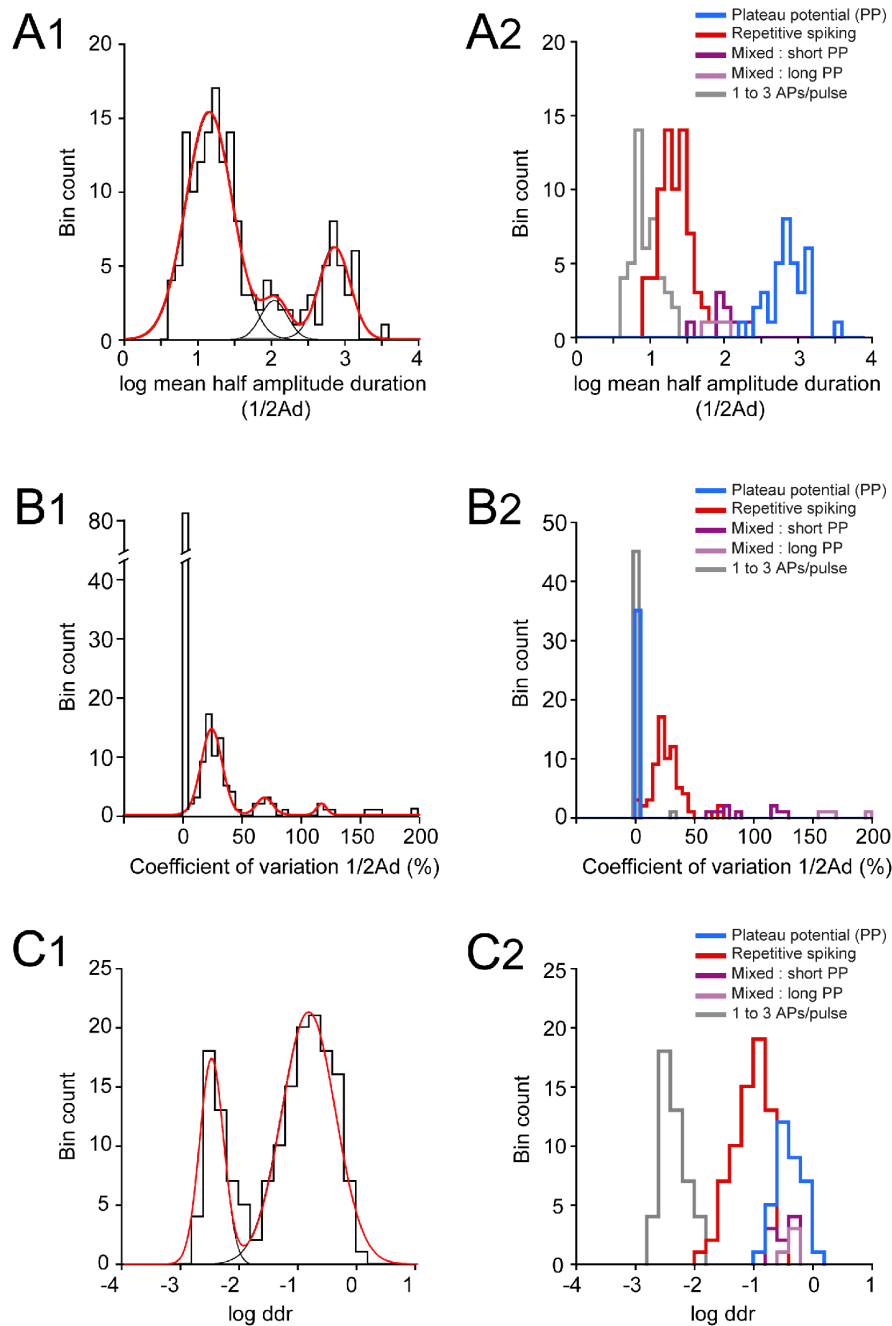

**Figure 5-Figure supplement 1 : Distributions of log  $1/2Ad$ , CV  $1/2Ad$  and log ddr values related to the cluster analysis of embryonic  $V1^R$  firing patterns.**

(A1) Histogram of log mean  $1/2Ad$  (mean half amplitude event duration) for the whole  $V1^R$  population at E12.5 ( $n=164$ ; bin width 0.1). The histogram was well fitted by the sum of three Gaussian curves with means and SDs of 1.135, 2.046 & 2.84, and 0.316, 0.181 & 0.21, respectively. (A2) Histogram of the values of log mean  $1/2Ad$  sorted after cluster analysis showing SS  $V1^R$  (black), RS  $V1^R$  (red), ME  $V1^R$  with short plateau potentials ( $ME_s V1^R$ , light purple), ME  $V1^R$  with long plateau potentials ( $ME_l V1^R$ , dark purple) and PP  $V1^R$  (blue). log



mean  $\frac{1}{2}Ad$  was significantly different between SS  $V1^R$ , PP  $V1^R$ , the whole ME  $V1^R$  population (ME<sub>s</sub> and ME<sub>l</sub>  $V1^R$ ) and PP  $V1^R$  (Kruskall-Wallis test  $P < 0.0001$ ; SS  $V1^R$  versus RS  $V1^R$ ,  $P < 0.0001$ ; SS  $V1^R$  versus ME  $V1^R$ ,  $P < 0.0001$ ; SS  $V1^R$  versus PP  $V1^R$ ,  $P < 0.0001$ ; RS  $V1^R$  versus ME  $V1^R$ ,  $P = 0.0004$ ; RS  $V1^R$  versus PP  $V1^R$ ,  $P < 0.0001$ ; ME  $V1^R$  versus PP  $V1^R$ ,  $P = 0.018$ ; SS  $V1^R$   $n = 46$ , RS  $V1^R$   $n = 69$ , ME<sub>s</sub>  $V1^R$   $n = 9$ , ME<sub>l</sub>  $V1^R$   $n = 4$ , PP  $V1^R$   $n = 35$ ). (B1) Histogram of CV  $\frac{1}{2}Ad$  for the whole  $V1^R$  population at E12.5 ( $n = 164$ ; bin width 5%). Note that a large population of  $V1^R$  had zero CV  $\frac{1}{2}Ad$  ( $n = 83$ ). The histogram for CV  $\frac{1}{2}Ad \neq 0$  was fitted by the sum of three Gaussian curves with means and SDs of 23.4, 68.4 & 117 (%) and 8.9, 6.8 & 4.1, respectively. (B2) Histograms of the values of CV  $\frac{1}{2}Ad$  sorted after cluster analysis showing SS  $V1^R$  (black), RS  $V1^R$  (red), ME<sub>s</sub>  $V1^R$  (light purple), ME<sub>l</sub>  $V1^R$  (dark purple) and PP  $V1^R$ . CV  $\frac{1}{2}Ad$  was not significantly different between SS  $V1^R$  and PP  $V1^R$  (CV  $\frac{1}{2}Ad$  of SS  $V1^R$  and PP  $V1^R$  = 0.682 % and 0% respectively: only one of the 46 SS  $V1^R$  displayed 3 PA and had a CV  $\frac{1}{2}Ad$  of 31.37). CV  $\frac{1}{2}Ad$  was significantly different between RS  $V1^R$  and the whole ME  $V1^R$  population and also between SS  $V1^R$  or PP  $V1^R$  and RS  $V1^R$  or ME  $V1^R$  (Kruskall-Wallis test  $P < 0.0001$ ; SS  $V1^R$  versus RS  $V1^R$   $P < 0.0001$ , SS  $V1^R$  versus ME  $V1^R$   $P < 0.0001$ , SS  $V1^R$  versus PP  $V1^R$   $P = 0.846$ , RS  $V1^R$  versus ME  $V1^R$   $P = 0.0003$ , RS  $V1^R$  versus PP  $V1^R$   $P < 0.0001$ , ME  $V1^R$  versus PP  $V1^R$   $P < 0.0001$ ). (C1) Histogram of log ddr (sum of  $\frac{1}{2}Ad$  divided by pulse duration) for the whole  $V1^R$  population at E12.5 ( $n = 164$ ; bin width 0.2). The histogram was fitted by the sum of two Gaussian curves with means and SDs of -2.51 & -0.851, and 0.2 & 0.46, respectively. (C2) Histograms of the values of log ddr sorted after cluster analysis showing SS  $V1^R$  (black), RS  $V1^R$  (red), ME<sub>s</sub>  $V1^R$  (light purple), ME<sub>l</sub>  $V1^R$  (dark purple) and PP  $V1^R$ . log (ddr) was not significantly different between ME  $V1^R$  and PP  $V1^R$ , while it was significantly different between SS  $V1^R$  and RS  $V1^R$ , SS  $V1^R$  and the whole ME  $V1^R$  population, SS  $V1^R$  and PP  $V1^R$ , RS  $V1^R$  and the whole ME  $V1^R$  population, RS  $V1^R$  and PP  $V1^R$  (Kruskall-Wallis test  $P < 0.0001$ ; SS  $V1^R$  versus RS  $V1^R$ ,  $P < 0.0001$ ; SS  $V1^R$  versus ME  $V1^R$ ,  $P < 0.0001$ ; SS  $V1^R$  versus PP  $V1^R$ ,  $P < 0.0001$ ; RS  $V1^R$  versus ME  $V1^R$ ,  $P < 0.0001$ ; RS  $V1^R$  versus PP  $V1^R$ ,  $P < 0.0001$ ; ME  $V1^R$  versus PP  $V1^R$ ,  $P = 0.977$ ). ME<sub>s</sub>  $V1^R$  and ME<sub>l</sub>  $V1^R$  differed only by their CV  $\frac{1}{2}Ad$  (Mann-Whitney test, log mean  $\frac{1}{2}Ad$  for ME<sub>s</sub>  $V1^R$  versus log mean  $\frac{1}{2}Ad$  for ME<sub>l</sub>  $V1^R$ ,  $P = 0.26$ ; CV  $\frac{1}{2}Ad$  for ME<sub>s</sub>  $V1^R$  versus CV  $\frac{1}{2}Ad$  ME<sub>l</sub>  $V1^R$ ,  $P = 0.0028$  and log ddr for ME<sub>s</sub>  $V1^R$  versus log ddr for ME<sub>l</sub>  $V1^R$ ,  $P = 0.1483$ ). It is noteworthy that the distribution of the values of each metric was multimodal thus indicating that each of them could partially discriminate different groups of embryonic  $V1^R$  according to their firing pattern.

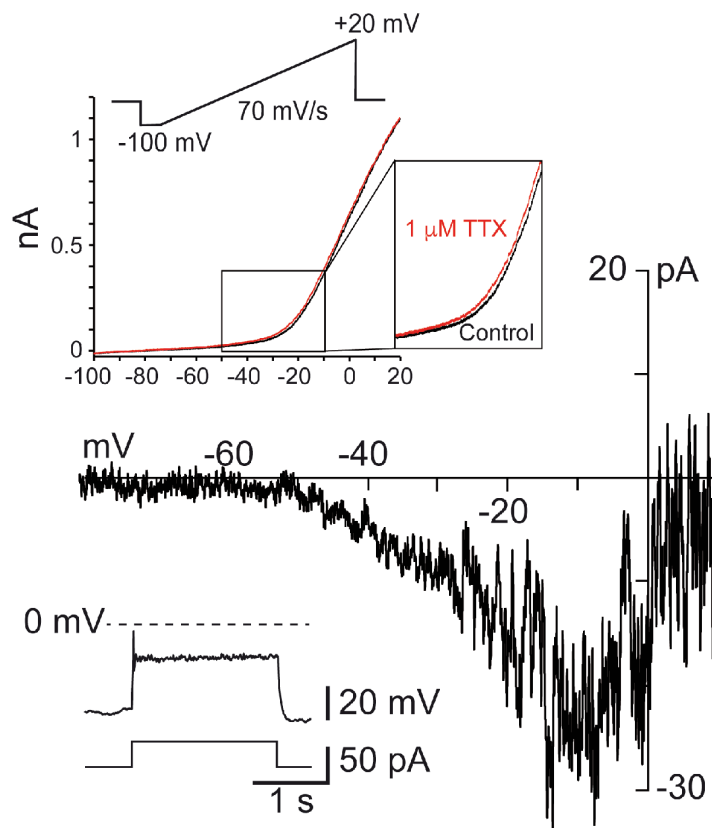

**Figure 9-Figure supplement 1.  $I_{Nap}$  is present in embryonic  $V1^R$  recorded at E14.5.**

Representative trace of  $I_{Nap}$  evoked by a slow depolarizing voltage ramp (70 mV/s, upper insert) in SS embryonic  $V1^R$  (lower insert).  $I_{Nap}$  was isolated by subtracting currents evoked by depolarizing ramps in the presence of 1  $\mu$ M TTX to the control current evoked in the absence of TTX (upper insert).

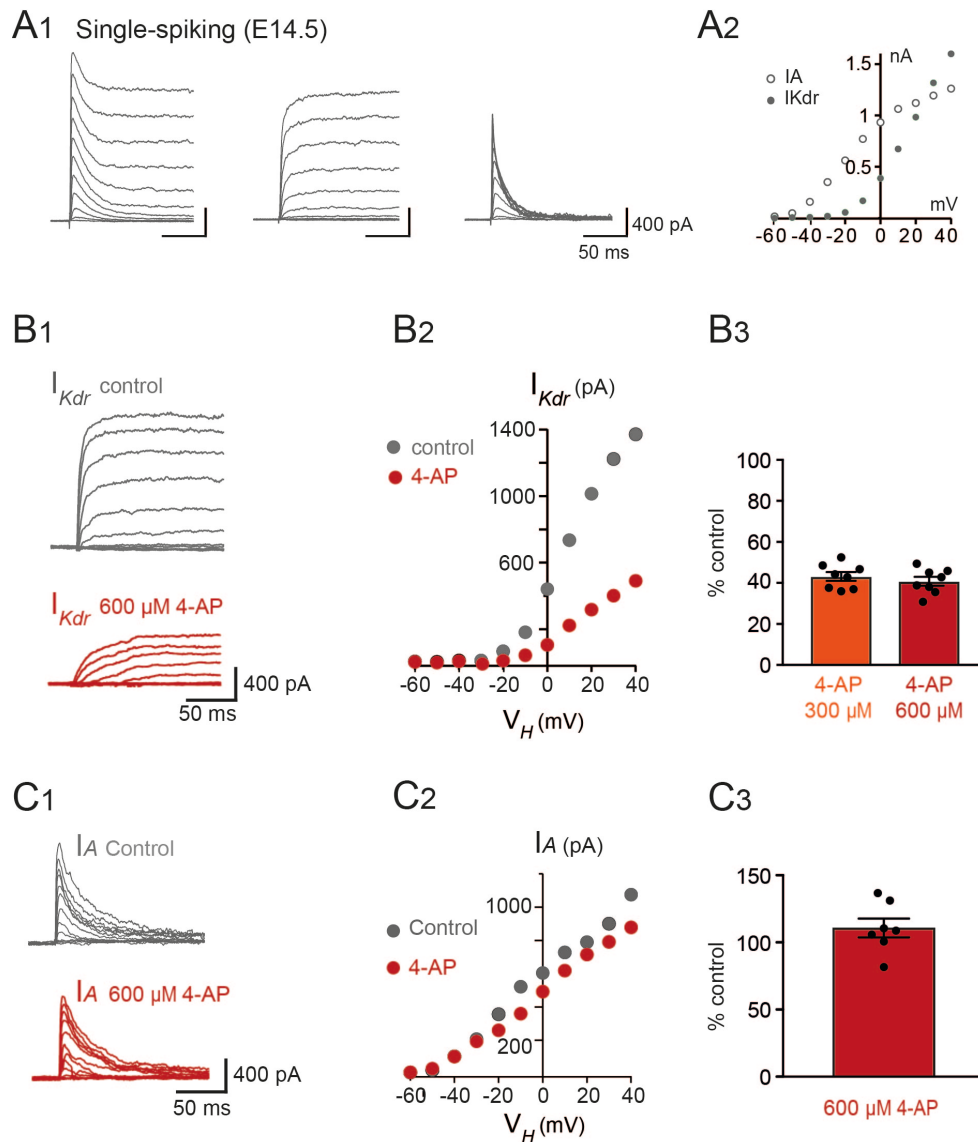

**Figure 9-Figure supplement 2.  $I_{Kdr}$  was inhibited by 4-AP in  $V1^R$  recorded at E14.5.**

(A1) Representative examples of the total outward  $K^+$  currents obtained from  $V_H = -100$  mV (left traces), of  $I_{Kdr}$  ( $V_H = -30$  mV, middle traces) and of isolated  $I_A$  (left traces) recorded in SS  $V1^R$  at E14.5. (A2) Current-voltage relationship of  $I_{Kdr}$  (filled circle) and of  $I_A$  (open circle) in SS  $V1^R$  at E14.5.  $I - V$  curves were obtained from currents shown in A1. (B1) Representative example of the effect of 4-AP at 600  $\mu$ M in  $V1^R$  at E14.5. (B2) Current-voltage curves in control condition and in the presence of 600  $\mu$ M 4-AP. (B3) Bar plots showing the percentage of  $I_{Kdr}$  inhibition evoked by 300  $\mu$ M 4-AP application ( $n = 8$ ) and by 600  $\mu$ M 4-AP application ( $n = 7$ ). The percentages of  $I_{Kdr}$  inhibition evoked by 300  $\mu$ M 4-AP and by 600  $\mu$ M 4-AP applications were not significantly different ( $P = 0.574$ ). (C1) Representative example of the effect of 600  $\mu$ M 4-AP on  $I_A$  in  $V1^R$  recorded at E14.5. (C2)  $I - V$  curves in control conditions and in the presence of 600  $\mu$ M 4-AP. These curves were obtained from the traces shown in B1. (C3) Bar graph showing the percentage of  $I_A$  block elicited by 4-AP. 4-AP did not significantly block  $I_A$  (Wilcoxon test  $P = 0.11$ ,  $n = 6$ ).

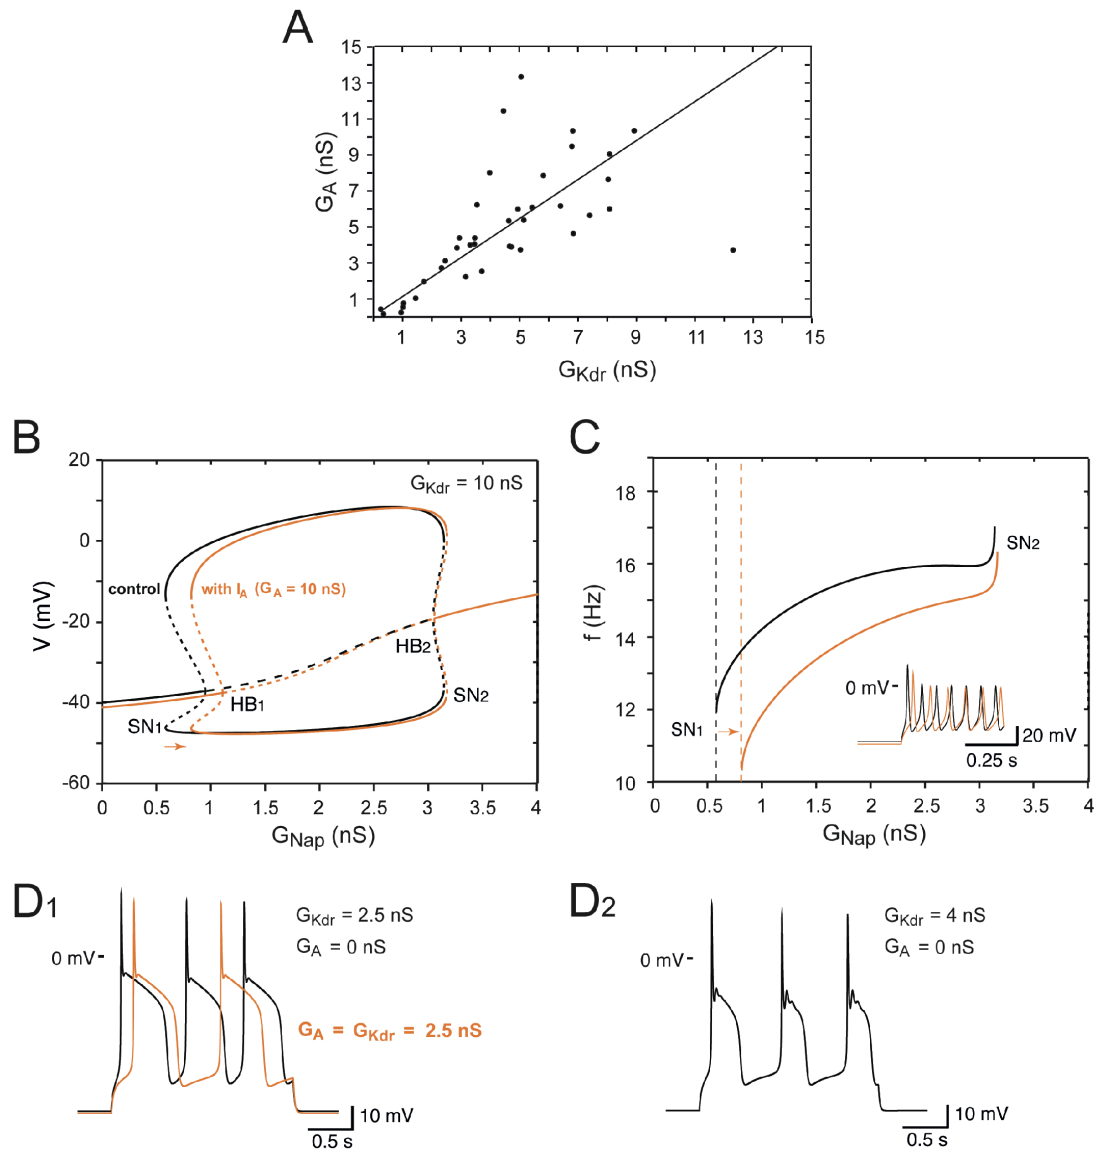

**Figure 10-Figure supplement 1. Effects of  $I_A$  on embryonic  $V1^R$  firing patterns predicted by computational modeling.**

(A) The maximal conductances of  $I_{Kdr}$  and  $I_A$  at E12.5 are linearly correlated. Best fit:  $G_A = 1.09 G_{Kdr}$  ( $R^2 = 0.81$ ,  $N=44$ ). (B) Effect of  $I_A$  on the dynamics of the basic model. The one-parameter bifurcation diagrams in control condition (black,  $G_{Kdr} = 10$  nS, no  $I_A$ , same as in Fig 9B) and with  $I_A$  added (orange,  $G_A = 10$  nS) are superimposed. The  $I_A$  current shifts the firing threshold  $SN_1$  to the right by 0.234 nS (from  $G_{Nap} = 0.582$  nS to  $G_{Nap} = 0.816$  nS, see also C) as indicated by the orange arrow, without affecting the amplitude of action potentials (see also insert in C). In contrast,  $I_A$  shifts  $SN_2$  by only 0.025 nS because it is inactivated by depolarization. (C)  $I_A$  also slows down the discharge frequency, as shown by comparing the  $G_{Nap} - V$  curves without  $I_A$  (black) and with  $I_A$  (orange). For  $G_{Nap} = 1$  nS, for instance, the firing frequency is reduced by 16.7%, from 14.19 to 11.82 Hz. Here again, the effect of  $I_A$  progressively decreases as  $G_{Nap}$  increases because of the membrane depolarization elicited by  $I_{Nap}$ . For  $G_{Nap} = 3$  nS, for instance, the firing frequency is reduced by 5% only, from 15.96 to 15.16 Hz. The frequency reduction elicited by  $I_A$  does not merely result from the increased firing threshold; when shifted to the right by 0.234 nS, the control  $G_{Nap} - V$  curve still does not overlap with the  $G_{Nap} - V$  curve obtained for  $G_A = 10$  nS (not shown). Note that

the latency of the first spike is increased (see voltage trace in insert), which is a classical effect of  $I_A$ . (D) In the pseudo-plateau bursting regime, the  $I_A$  ( $G_A = 10$  nS) lengthens the repolarizing phase without affecting the duration of plateaus much, as shown by the comparison of the voltage traces obtained without  $I_A$  (control, black) and with  $I_A$  (orange) in D1. This is because  $I_A$  is activated near rest but inactivated during voltage plateaus. In the example shown, only two plateaus occur during the 2 s current pulse, instead of three in the control condition. Note also that the latency of the first plateau is increased. Increasing  $G_{Kdr}$  to 4 nS, in the absence of  $I_A$ , similarly lengthens repolarization episodes, as shown in D2. However, plateaus are shortened and display some spikelets, at variance with D1. This is because  $I_{Kdr}$  does not inactivate (or does it only very slowly), in contrast to  $I_A$ .

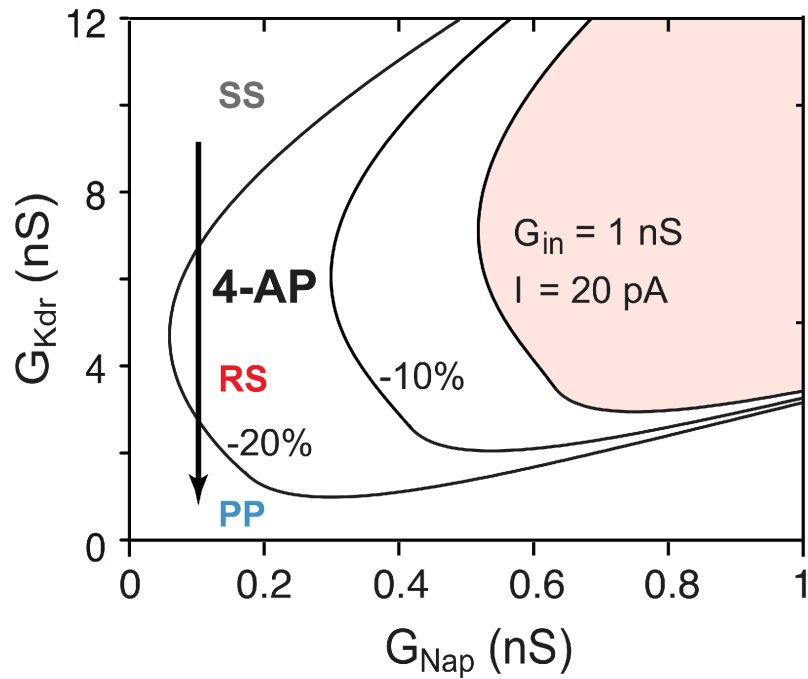

**Figure 10-Figure supplement 2. Influence of input conductance changes on the bifurcation diagram.**

The RS region of the basic model is displayed in the  $G_{Nap} - G_{Kdr}$  plane in control condition for E12.5 V1<sup>R</sup> ( $C_{in} = 13$  pF,  $G_{in} = 1$  nS,  $I = 20$  pA, shaded area), and when  $G_{in}$  and  $I$  were both reduced by 10% (middle curve) or by 20% (left curve). The reduced  $I$  accounts for the decrease in rheobase following the decrease in  $G_{in}$ . If 4-AP reduced only  $G_{Kdr}$  (as indicated by a downward arrow) the firing pattern of SS V1<sup>R</sup> would not change, the control RS region being too far to the right to be visited. In contrast, when the effects of 4-AP on the input resistance and rheobase are taken into account, the bifurcation diagram moves closer to the origin of the  $G_{Nap} - G_{Kdr}$  plane, and the RS and PP regions are then successively entered as  $G_{Kdr}$  is reduced. The same explanation holds at E14.5.
